# Supplementary material
Source: publisher figshare collection journal article supplement (https://geolsoc.figshare.com/ndownloader/files/5424254)
Supplement: Supplementary file 1 [file 5424254]

Appendix D. 40Ar/39Ar incremental heating data and analytical conditions
--- Atmospheric argon ratios and discrimination ---
(40Ar/36Ar)atm			298.61 � 0.09
(40Ar/38Ar)atm			1575.78 � 0.96
Source of spectrometer discrimination value and error			Saved with run
--- Minor irradiation parameters ---
(38Ar/37Ar)Ca			0.0000196 � 8.160000e-7
(38Ar/39Ar)K			0.0122 � 0.000027
P(36Cl/38Cl)			320 � 0
--- Decay constants ---
? 40K epsilon			5.810000e-11 � 1.700000e-12
? 40K Beta			4.962000e-10 � 8.600000e-12
? 37Ar			0.01975 � 0
? 39Ar			7.068000e-6 � 0
? 36Cl			6.308000e-9 � 0
--- Calculation options ---
Always calculate without ratios			TRUE
Calc. %40Ar* as %40*/(40*+40Atm)			TRUE
Number of trials in Monte Carlo sim.			100
37Ar/39Ar calculation			Normal
--- Isotope curve fitting ---
Parabolic vs. Linear probability cutoff			0.05
Error envelope as 1 or 2 sigma			1
Delete outliers within cycles before fit			TRUE
Number of iterations of deleting outliers after fit			1
Cutoff for detecting outliers, sigma			2
Run_ID	Sample	Locality	Irrad	Run_Date	Material	POWER	Age	� ?	� ?/ with J	J	� ? J	Mass discrimination 1AMU	Ar39_Moles	Ar40_Moles	36Ar/39Ar	� ? 36Ar/39Ar	%Ar36Ca	37Ar/39Ar	� ? 37Ar/39Ar	Ca/K	� ? Ca/K	Cl/K	� ? Cl/K	38Ar/39Ar	� ? 38Ar/39Ar	40Ar/39Ar	� ? 40Ar/39Ar	40Ar*/39Ar	� ? 40Ar*/39Ar	%40Ar*	� ? %40Ar*	37_Decay	39_Decay	40Ar beam int cps	� ? 40Ar	39Ar beam int cps	� ? 39Ar	38Ar beam int cps	� ? 38Ar	37Ar beam int cps	� ? 37Ar	36Ar beam int cps	� ? 36Ar	40ArF beam int cps	� ? 40ArF	39ArF beam int cps	� ? 39ArF
BURKO
21777-01A	10-BRK-00	Burko	58c	15/12/2012	matrix/wr	3	2.996739	0.1296894	0.1309546	0.0000632	3.83E-07	1.001145	5.14E-16	1.48E-13	0.8745072	0.0146835	0.0143658	0.4622072	0.1062485	0.905926	0.208247	0.0529317	6.04E-06	0.1961525	0.0040581	287.3944	4.773507	26.30329	1.139269	9.149346	0.3442317	78.64286	1.001563	0.347581	0.000665	0.0012094	0.0000199	0.0002372	2.95E-06	0.000559	0.000128	0.0010576	3.32E-06	0.0750507	0.0000306	0.0002785	0.0000608
21777-01B	10-BRK-00	Burko	58c	15/12/2012	matrix/wr	5	3.937435	0.1236219	0.1259022	0.0000632	3.83E-07	1.001127	6.70E-16	2.13E-13	0.9502536	0.013066	0.0133514	0.4667752	0.0815121	0.9148793	0.1597638	0.1081486	4.63E-06	0.2295465	0.0038905	318.2756	4.331531	34.56907	1.086535	10.85778	0.2831723	78.71271	1.001564	0.50239	0.000822	0.0015785	0.0000212	0.0003623	3.70E-06	0.0007368	0.0001281	0.0015	3.87E-06	0.1064731	0.0000319	0.0004042	0.0000601
21777-01C	10-BRK-00	Burko	58c	15/12/2012	matrix/wr	7	3.736527	0.0859266	0.0888586	0.0000632	3.83E-07	1.001108	1.06E-15	2.86E-13	0.7991535	0.0080327	0.0134597	0.395787	0.0518127	0.7757425	0.1015529	0.1007168	2.95E-06	0.1983533	0.0025712	271.3979	2.670626	32.80335	0.75514	12.08344	0.2219166	78.7845	1.001564	0.6744238	0.0006356	0.002485	0.0000242	0.0004929	4.18E-06	0.0009835	0.0001283	0.0019859	4.53E-06	0.1441624	0.0000326	0.0004947	0.0000623
21777-01D	10-BRK-00	Burko	58c	15/12/2012	matrix/wr	9	3.574258	0.0634026	0.0669989	0.0000632	3.83E-07	1.001052	1.64E-15	3.76E-13	0.6627854	0.0047468	0.0159257	0.3883952	0.0334557	0.7612546	0.0655731	0.059852	1.90E-06	0.1584206	0.0015436	229.2522	1.611836	31.37736	0.557144	13.6831	0.194049	79.00039	1.001565	0.8850414	0.0010096	0.0038606	0.0000267	0.0006116	4.18E-06	0.0014994	0.0001286	0.0025587	4.62E-06	0.1904907	0.0000391	0.0007681	0.0000553
21777-01E	10-BRK-00	Burko	58c	15/12/2012	matrix/wr	10	3.478144	0.0639256	0.0673097	0.0000632	3.83E-07	1.001034	1.77E-15	3.69E-13	0.597002	0.0042623	0.0245687	0.5395803	0.0338741	1.057577	0.0663933	0.037267	1.93E-06	0.1381606	0.0015217	208.7487	1.458187	30.5328	0.5617103	14.62102	0.2251149	79.07079	1.001565	0.8681313	0.001208	0.0041587	0.0000283	0.0005746	4.95E-06	0.002244	0.0001399	0.0024828	5.10E-06	0.1885132	0.0000397	0.0009081	0.0000623
21777-01F	10-BRK-00	Burko	58c	15/12/2012	matrix/wr	12	3.791116	0.0532197	0.0579644	0.0000632	3.83E-07	1.001015	2.21E-15	4.33E-13	0.5471178	0.0034193	0.0403485	0.8119276	0.0333589	1.591378	0.0653834	0.0234574	1.90E-06	0.1239345	0.0012538	196.5735	1.19554	33.2831	0.4677192	16.92192	0.1879082	79.1407	1.001566	1.020758	0.0011087	0.0051928	0.0000309	0.0006436	5.24E-06	0.0042161	0.0001712	0.002841	5.19E-06	0.217879	0.000041	0.00127	0.0000594
21777-01G	10-BRK-00	Burko	58c	15/12/2012	matrix/wr	16	3.811874	0.0382276	0.0446618	0.0000632	3.83E-07	1.000997	2.85E-15	4.95E-13	0.4703694	0.0016544	0.0815164	1.409994	0.029944	2.763588	0.0586903	0.0050544	1.70E-06	0.1030206	0.0007915	173.7752	0.5480617	33.46553	0.3359657	19.23872	0.1526135	79.21051	1.001566	1.165416	0.000743	0.0067065	0.0000206	0.0006909	4.85E-06	0.0094561	0.0001985	0.0031545	5.39E-06	0.251819	0.00005	0.001279	0.0000616
21777-01H	10-BRK-00	Burko	58c	15/12/2012	matrix/wr	20	3.892488	0.0527526	0.0577835	0.0000632	3.83E-07	1.000961	2.21E-15	4.79E-13	0.6110993	0.0039967	0.1061006	2.384082	0.0528311	4.672801	0.103549	0.0138536	3.00E-06	0.1326835	0.0012522	216.4036	1.367193	34.17403	0.46364	15.76509	0.1581507	79.35068	1.001567	1.127941	0.0005477	0.0052122	0.0000327	0.0006916	4.85E-06	0.0124263	0.0002638	0.0031852	5.67E-06	0.2458694	0.0000488	0.001106	0.0000554
21777-01I	10-BRK-00	Burko	58c	15/12/2012	matrix/wr	22	4.363902	0.0666224	0.071675	0.0000632	3.83E-07	1.000942	1.22E-15	2.57E-13	0.5806803	0.0054271	0.0813431	1.736888	0.0598742	3.4043	0.1173534	0.0074967	3.40E-06	0.1247533	0.0016692	211.5271	1.919369	38.31781	0.5856942	18.09254	0.1983377	79.42156	1.001567	0.6056727	0.0003303	0.0028633	0.0000258	0.0003572	3.51E-06	0.0049733	0.0001653	0.0016627	3.86E-06	0.1309914	0.0000338	0.0005731	0.0000601
21777-01J	10-BRK-00	Burko	58c	15/12/2012	matrix/wr	24	4.380018	0.0768316	0.0812836	0.0000632	3.83E-07	1.000924	9.77E-16	2.24E-13	0.6391737	0.0063339	0.0649036	1.525503	0.0706778	2.989985	0.1385284	0.0077903	4.02E-06	0.1359476	0.0019771	229.1583	2.200398	38.45949	0.6754517	16.76479	0.2248113	79.49167	1.001567	0.5273276	0.0003669	0.0023012	0.000022	0.0003128	3.42E-06	0.0035104	0.000159	0.0014708	3.77E-06	0.1137819	0.0000369	0.000368	0.0000615
21777-01K	10-BRK-00	Burko	58c	16/12/2012	matrix/wr	26	4.517365	0.0892339	0.093335	0.0000632	3.83E-07	1.000867	8.10E-16	1.82E-13	0.6202054	0.0071898	0.0726135	1.656041	0.076281	3.24584	0.1495109	0.0093983	4.34E-06	0.1329023	0.0021828	224.6861	2.517277	39.667	0.7845451	17.63368	0.2697639	79.7139	1.001568	0.4285492	0.0003576	0.0019073	0.0000212	0.0002535	3.05E-06	0.0031586	0.000141	0.0011829	3.67E-06	0.0925731	0.0000341	0.0003265	0.000058
21777-01L	10-BRK-00	Burko	58c	16/12/2012	matrix/wr	30	4.803622	0.0953209	0.0996622	0.0000632	3.83E-07	1.000849	7.21E-16	1.61E-13	0.6059162	0.0076185	0.0801512	1.785806	0.0893662	3.500181	0.1751578	0.0151253	5.08E-06	0.1321641	0.0023684	222.9187	2.711085	42.18397	0.8381945	18.89951	0.2802373	79.78414	1.001568	0.378575	0.0003031	0.0016983	0.0000206	0.0002244	2.95E-06	0.0030328	0.0001471	0.001029	3.40E-06	0.0812405	0.0000322	0.0003111	0.0000559
21777-01M	10-BRK-00	Burko	58c	16/12/2012	matrix/wr	35	4.719535	0.107771	0.1114976	0.0000632	3.83E-07	1.000831	6.13E-16	1.46E-13	0.6616039	0.0099989	0.0743433	1.808635	0.113892	3.544924	0.2232283	-0.0028227	6.47E-06	0.136527	0.0027859	238.8067	3.530329	41.44458	0.9476288	17.33261	0.2852485	79.85481	1.001569	0.3447514	0.0003031	0.0014436	0.0000212	0.0001971	2.77E-06	0.002611	0.0001597	0.0009551	3.13E-06	0.0743509	0.0000322	0.0003841	0.0000625
21983-01A	10-BRK-04	Burko	60a	18/01/2013	wr	3	2.451414	0.6594035	0.659411	0.0000631	8.08E-08	0.9957795	2.42E-16	1.99E-13	2.678343	0.0706863	0.0069169	0.6814258	0.0624612	1.335595	0.1224239	0.067353	3.55E-06	0.542943	0.015318	821.2753	21.58176	21.56028	5.803421	2.623951	0.2962125	12.23204	1.000897	0.4678855	0.0003196	0.0005697	0.0000151	0.0003093	3.21E-06	0.0003882	0.0000342	0.0015259	4.52E-06	0.4713205	0.0041215	0.0000126	0.0001275
21983-01B	10-BRK-04	Burko	60a	18/01/2013	wr	5	2.365025	0.5902707	0.5902785	0.0000631	8.08E-08	0.9958027	5.37E-16	4.25E-13	2.580898	0.0401354	0.0068883	0.6539302	0.0276869	1.281703	0.0542664	0.1206455	1.58E-06	0.5428549	0.0091633	791.4198	12.30163	20.79999	5.194734	2.626967	0.1802328	12.24247	1.000897	1.000012	0.0006772	0.0012636	0.0000198	0.0006859	4.58E-06	0.0008263	0.0000327	0.0032611	5.61E-06	1.009073	0.0067812	0.000989	0.0001227
21983-01C	10-BRK-04	Burko	60a	18/01/2013	wr	7	2.438823	0.4057166	0.4057286	0.0000631	8.08E-08	0.9958747	9.74E-16	5.45E-13	1.802394	0.0178851	0.0075668	0.5017448	0.0166723	0.9834199	0.0326777	0.1483966	9.51E-07	0.4049041	0.0045717	559.6146	5.611792	21.44947	3.570693	3.831538	0.2145241	12.27498	1.000898	1.283249	0.002012	0.0022931	0.0000227	0.0009285	5.07E-06	0.0011505	0.0000367	0.0041331	6.40E-06	1.284196	0.0093192	0.0021547	0.0001792
21983-01D	10-BRK-04	Burko	60a	18/01/2013	wr	9	2.358095	0.2953791	0.2953945	0.0000631	8.08E-08	0.9958973	1.63E-15	6.54E-13	1.278159	0.0091075	0.0094155	0.4427762	0.0106964	0.8678414	0.0209649	0.1100804	6.13E-07	0.2923516	0.0026649	402.3682	2.994399	20.739	2.599502	5.152622	0.269429	12.28519	1.000898	1.539703	0.0035069	0.0038266	0.0000269	0.0011187	6.45E-06	0.0016943	0.0000394	0.004891	7.69E-06	1.542025	0.0144636	0.0035666	0.0001975
21983-01E	10-BRK-04	Burko	60a	18/01/2013	wr	12	2.405297	0.4392442	0.439255	0.0000631	8.08E-08	1.0000000	2.95E-15	8.75E-13	0.9219682	0.0040519	0.0159656	0.5414993	0.0072799	1.061339	0.0142686	0.0602288	4.23E-07	0.2076594	0.0012941	296.4119	3.700541	21.15441	3.865697	7.134099	1.1753	12.29555	1.000898	2.060643	0.0244346	0.006952	0.0000295	0.0014436	6.35E-06	0.0037645	0.0000482	0.0064095	7.97E-06	2.052516	0.0243256	0.005752	0.0002956
21983-01F	10-BRK-04	Burko	60a	18/01/2013	wr	17	3.086001	0.4049313	0.4049506	0.0000631	8.08E-08	1.0000000	5.24E-15	1.23E-12	0.6937424	0.002064	0.0403149	1.028574	0.0073772	2.016005	0.0144594	0.0357258	4.52E-07	0.1559415	0.0008259	234.202	3.397449	27.14627	3.565061	11.58252	1.430376	12.30553	1.000899	2.891473	0.0416505	0.0123461	0.0000339	0.0019253	8.34E-06	0.0126988	0.0000841	0.008565	9.49E-06	2.913002	0.041952	0.0112062	0.0002643
21983-01G	10-BRK-04	Burko	60a	18/01/2013	wr	25	5.286681	0.7839329	0.7839621	0.0000631	8.08E-08	1.0000000	5.75E-15	1.96E-12	0.983881	0.0030866	0.0328692	1.18928	0.0083687	2.330989	0.0164026	-0.0027551	5.12E-07	0.1976469	0.0009033	340.1946	6.753777	46.53313	6.910258	13.66685	1.980173	12.32596	1.000899	4.607415	0.0917181	0.0135435	0.0000395	0.0026768	8.74E-06	0.016107	0.0001032	0.0133252	0.0000152	4.627178	0.0920754	0.0130779	0.0002872
21983-01H	10-BRK-04	Burko	60a	18/01/2013	wr	35	4.817219	0.9916365	0.9916557	0.0000631	8.08E-08	1.0000000	2.99E-15	1.13E-12	1.130528	0.0033011	0.0223722	0.9301993	0.0095029	1.823191	0.0186256	0.0026186	5.60E-07	0.2273	0.0012072	379.8795	8.570581	42.39543	8.738861	11.15287	2.252418	12.33595	1.0009	2.672328	0.0607139	0.0070347	0.0000189	0.001599	7.05E-06	0.0065436	0.0000646	0.0079529	8.91E-06	2.68298	0.0609422	0.0069878	0.0001864
21977-01A	10-BRK-05	Burko	60a	08/01/2013	matrix	3	3.451622	0.0670347	0.0673743	0.0000633	1.24E-07	0.9990698	3.43E-16	1.93E-14	0.0873885	0.0016855	0.094742	0.3047203	0.0457194	0.5972518	0.0896099	0.0139482	2.60E-06	0.0335575	0.0016749	56.32452	0.5441613	30.26001	0.588249	53.71344	0.9714789	10.01559	1.000825	0.0455474	0.0002189	0.0008087	6.80E-06	0.0000271	1.34E-06	0.0002464	0.0000369	0.0000707	1.23E-06	0.0105003	0.000024	0.0001893	0.0000318
21977-01B	10-BRK-05	Burko	60a	08/01/2013	matrix	5	3.100031	0.0226635	0.0234617	0.0000633	1.24E-07	0.9990425	1.19E-15	4.95E-14	0.0486402	0.0005232	0.123718	0.22157	0.0139344	0.4342771	0.0273114	0.0189439	7.92E-07	0.0279407	0.0006493	41.67793	0.1627162	27.17501	0.1988395	65.19324	0.4437184	10.02456	1.000825	0.1164518	0.0002566	0.0027941	8.97E-06	0.0000781	1.80E-06	0.0006191	0.0000389	0.0001359	1.40E-06	0.026581	0.000024	0.0006186	0.0000298
21977-01C	10-BRK-05	Burko	60a	08/01/2013	matrix	7	2.602416	0.0252289	0.0257381	0.0000633	1.24E-07	0.9989891	2.30E-15	7.78E-14	0.0369139	0.0003458	0.1477463	0.2008427	0.0074171	0.3936517	0.0145374	0.0259969	4.22E-07	0.0281515	0.0004372	33.81376	0.2272177	22.80974	0.2212863	67.44875	0.6749775	10.04212	1.000826	0.1831999	0.0009417	0.0054179	0.0000235	0.0001525	2.28E-06	0.0010881	0.0000399	0.0002	1.66E-06	0.0448292	0.0000234	0.0014902	0.0000511
21977-01D	10-BRK-05	Burko	60a	08/01/2013	matrix	9	2.431342	0.022802	0.0232935	0.0000633	1.24E-07	0.9989616	3.60E-15	1.13E-13	0.0339875	0.0002289	0.122737	0.1536966	0.0046833	0.3012454	0.0091793	0.0229042	2.66E-07	0.0265324	0.0003124	31.44421	0.2001849	21.30929	0.1999813	67.7627	0.7120283	10.05117	1.000826	0.266363	0.0015134	0.008471	0.0000245	0.0002248	2.57E-06	0.001302	0.0000395	0.0002879	1.75E-06	0.0614831	0.0000242	0.0018031	0.0000369
21977-01E	10-BRK-05	Burko	60a	08/01/2013	matrix	12	2.425255	0.017533	0.0181645	0.0000633	1.24E-07	0.9989348	5.37E-15	1.65E-13	0.0313879	0.0001994	0.1286393	0.1487773	0.0033565	0.2916035	0.0065787	0.0190363	1.91E-07	0.0247062	0.0004737	30.61504	0.1576144	21.25591	0.1537695	69.42391	0.5334988	10.05999	1.000827	0.3873592	0.0016126	0.0126526	0.0000383	0.0003126	5.93E-06	0.0018824	0.0000421	0.0003971	2.22E-06	0.0925181	0.0000318	0.0029916	0.0000429
21977-01F	10-BRK-05	Burko	60a	08/01/2013	matrix	17	2.4574	0.0068734	0.0083897	0.0000633	1.24E-07	0.9988518	8.20E-15	2.58E-13	0.0333357	0.0001286	0.1930757	0.2369608	0.0031534	0.4644432	0.0061808	0.0176355	1.80E-07	0.0245887	0.0001903	31.47005	0.0461012	21.53783	0.0602827	68.42915	0.1742088	10.08736	1.000827	0.6074293	0.0006424	0.0193018	0.0000177	0.0004746	3.65E-06	0.0045738	0.0000608	0.0006434	2.41E-06	0.1335224	0.0000335	0.0039732	0.0000312
21977-01G	10-BRK-05	Burko	60a	08/01/2013	matrix	25	2.462991	0.0087767	0.010014	0.0000633	1.24E-07	0.9988245	7.70E-15	2.69E-13	0.0449165	0.0001818	0.1709814	0.2826808	0.0305879	0.5540544	0.0599522	0.0143739	1.74E-06	0.0256567	0.0002149	34.97282	0.0844388	21.58687	0.0769758	61.71355	0.1385915	10.09642	1.000828	0.6343401	0.0002985	0.0181381	0.0000423	0.0004654	3.75E-06	0.0051273	0.0005553	0.0008147	2.70E-06	0.1366189	0.0000418	0.0037785	0.0000403
21977-01H	10-BRK-05	Burko	60a	08/01/2013	matrix	35	2.551503	0.0172941	0.0180009	0.0000633	1.24E-07	0.9987975	1.60E-15	6.14E-14	0.0540797	0.0004166	0.4968839	0.9882492	0.1635374	1.936968	0.3205332	0.0082143	9.30E-06	0.0252405	0.0005063	38.41668	0.1167553	22.36318	0.1516846	58.17232	0.3653228	10.10535	1.000828	0.1446529	0.0002457	0.0037654	9.39E-06	0.000095	1.90E-06	0.0037211	0.0006164	0.0002036	1.48E-06	0.0311913	0.0000192	0.0006834	0.0000312
21778-01A	10-BRK-06	Burko	58c	16/12/2012	matrix	3	2.516379	0.1751276	0.1756843	0.0000636	3.54E-07	1.000773	5.32E-16	3.75E-13	2.284116	0.0403073	0.0357291	3.000675	0.1336575	5.881324	0.2619687	0.0124849	7.60E-06	0.4492229	0.0088623	703.7092	12.37125	21.93899	1.52791	3.110974	0.1742303	80.07712	1.00157	0.882	0.0005476	0.0012534	0.000022	0.000563	5.04E-06	0.0037609	0.0001538	0.0028628	4.81E-06	0.1892216	0.0000389	0.0004802	0.0000538
21778-01B	10-BRK-06	Burko	58c	16/12/2012	matrix	4	2.551677	0.0509831	0.052916	0.0000636	3.54E-07	1.000755	1.12E-15	1.31E-13	0.3202406	0.003101	0.1966785	2.315936	0.0715955	4.539235	0.1403271	0.0082629	4.07E-06	0.0756408	0.001343	117.65	1.060667	22.24695	0.4448135	18.87842	0.3218515	80.1481	1.00157	0.3094259	0.0003392	0.0026301	0.0000235	0.0001989	3.05E-06	0.006091	0.0001801	0.0008423	3.13E-06	0.0666526	0.0000316	0.0007448	0.0000517
21778-01C	10-BRK-06	Burko	58c	16/12/2012	matrix	6	2.541462	0.0184705	0.0232462	0.0000636	3.54E-07	1.000699	2.77E-15	1.13E-13	0.062264	0.0004858	0.7211419	1.65111	0.0307857	3.236176	0.06034	0.0000905	1.75E-06	0.0239632	0.00044	40.59109	0.1947502	22.15783	0.1611492	54.52477	0.2930463	80.3662	1.001571	0.2652099	0.0001693	0.0065337	0.0000309	0.0001566	2.77E-06	0.0107879	0.0001944	0.0004068	2.52E-06	0.0573599	0.0000344	0.0015212	0.0000608
21778-01D	10-BRK-06	Burko	58c	16/12/2012	matrix	8	2.531607	0.0124516	0.018781	0.0000636	3.54E-07	1.000681	2.89E-15	8.42E-14	0.0242233	0.0002887	1.429971	1.273808	0.0309467	2.496664	0.0606556	0.0009187	1.76E-06	0.0170554	0.0003854	29.18243	0.0866917	22.07185	0.1086353	75.56734	0.3049985	80.43712	1.001571	0.1982708	0.0001622	0.0067942	0.0000192	0.0001159	2.59E-06	0.0086545	0.0002087	0.0001646	1.91E-06	0.0430212	0.0000322	0.0016311	0.000056
21778-01E	10-BRK-06	Burko	58c	16/12/2012	matrix	12	2.504168	0.0146161	0.0201756	0.0000636	3.54E-07	1.000663	2.53E-15	7.60E-14	0.0280481	0.0003437	1.187011	1.224353	0.0318332	2.399732	0.062393	0.0026881	1.81E-06	0.0183923	0.0004407	30.09017	0.1018936	21.83245	0.1275177	72.4953	0.3630161	80.50724	1.001572	0.1789224	0.0002191	0.0059462	0.0000186	0.0001094	2.59E-06	0.0072803	0.0001878	0.0001668	1.98E-06	0.0387796	0.0000328	0.0014094	0.000051
21778-01F	10-BRK-06	Burko	58c	16/12/2012	matrix	15	2.456001	0.0397809	0.0420545	0.0000636	3.54E-07	1.000607	9.39E-16	3.73E-14	0.0619304	0.0010755	0.8831092	2.011043	0.0756256	3.941644	0.1482261	0.0020058	4.30E-06	0.0245458	0.0009018	39.71205	0.3892662	21.41222	0.3470587	53.84257	0.7031828	80.72823	1.001573	0.0877628	0.0001567	0.00221	0.0000212	0.0000542	1.92E-06	0.0044444	0.0001615	0.0001369	1.98E-06	0.0192511	0.0000272	0.0005513	0.0000475
21778-01G	10-BRK-06	Burko	58c	16/12/2012	matrix	20	2.342539	0.0640087	0.0653176	0.0000636	3.54E-07	1.000589	5.64E-16	3.90E-14	0.16667	0.0028428	1.760699	10.78914	0.2428689	21.14672	0.4760231	0.0067776	0.0000138	0.0456828	0.0017042	69.15947	1.011821	20.42238	0.5583936	29.30318	0.6698474	80.79916	1.001573	0.0917899	0.0001597	0.0013272	0.0000192	0.0000606	2.08E-06	0.0143196	0.0002461	0.0002212	1.98E-06	0.0198665	0.0000284	0.0004581	0.0000468
21778-01H	10-BRK-06	Burko	58c	16/12/2012	matrix	25	2.138431	0.1839945	0.1843774	0.0000636	3.54E-07	1.000570	1.68E-16	1.46E-14	0.2338908	0.0111121	2.027657	17.436	0.9083856	34.17456	1.780436	0.0163202	0.0000516	0.0614417	0.0049101	86.83746	3.818841	18.6419	1.604934	21.20162	1.563401	80.87006	1.001573	0.0344396	0.0001561	0.0003966	0.0000173	0.0000244	1.63E-06	0.0069151	0.0001956	0.0000928	1.72E-06	0.0076548	0.0000266	0.0001577	0.0000438
21778-01I	10-BRK-06	Burko	58c	16/12/2012	matrix	35	2.371396	0.3231786	0.3234468	0.0000636	3.54E-07	1.000552	9.54E-17	7.56E-15	0.2035848	0.0169993	3.097785	23.18642	1.912362	45.44539	3.748229	0.0063673	0.0001087	0.0520331	0.0079888	79.24321	6.004258	20.67412	2.819363	25.65958	2.900686	80.94143	1.001574	0.0177999	0.0001486	0.0002246	0.0000169	0.0000117	1.56E-06	0.0052082	0.0001751	0.0000457	1.65E-06	0.004046	0.0000261	0.0001761	0.0000446
21978-01A	10-BRK-08	Burko	60a	15/01/2013	wr	3	6.916812	1.626753	1.626806	0.000064	1.22E-07	0.9988037	1.57E-16	6.71E-14	1.234222	0.039202	0.033316	1.512075	0.160344	2.963666	0.3142743	0.022968	9.12E-06	0.2539435	0.0119536	428.3529	14.61957	59.98825	14.13559	13.98937	3.276905	11.58324	1.000877	0.158007	0.0041255	0.0003689	8.18E-06	0.0000937	3.90E-06	0.0005578	0.0000579	0.0004553	0.0000104	0.0353483	0.0000219	0.0000115	0.0000334
21978-01B	10-BRK-08	Burko	60a	15/01/2013	wr	5	7.76153	0.3778477	0.3781348	0.000064	1.22E-07	0.9985166	1.94E-16	6.87E-14	0.9631322	0.0191398	0.0262188	0.9287193	0.0763958	1.82029	0.1497357	0.0209524	4.34E-06	0.2019006	0.0059836	354.8119	6.574187	67.33011	3.284828	18.9638	0.7246938	11.68688	1.00088	0.1617128	0.0005236	0.0004558	8.33E-06	0.000092	2.16E-06	0.0004233	0.000034	0.000439	3.50E-06	0.037075	0.0000206	-0.0000654	0.0000382
21978-01C	10-BRK-08	Burko	60a	15/01/2013	wr	7	6.515941	0.2176285	0.21798	0.000064	1.22E-07	0.9984899	3.27E-16	7.27E-14	0.556542	0.0076342	0.048596	0.9946586	0.0476672	1.949531	0.0934276	0.005797	2.71E-06	0.1196232	0.0031906	222.5743	2.609091	56.5053	1.890653	25.3693	0.6683597	11.69657	1.000881	0.1713019	0.0005316	0.0007696	8.68E-06	0.0000921	2.23E-06	0.0007655	0.0000357	0.0004283	3.37E-06	0.0389062	0.00002	0.0001297	0.0000405
21978-01D	10-BRK-08	Burko	60a	15/01/2013	wr	9	4.977552	0.1389945	0.1393158	0.000064	1.22E-07	0.9984634	5.27E-16	8.00E-14	0.3646666	0.0037935	0.0565162	0.7580372	0.0302595	1.485753	0.0593086	0.0020037	1.72E-06	0.0819644	0.0018256	151.9552	1.205876	43.1462	1.206489	28.37886	0.6341576	11.70618	1.000881	0.1884574	0.0006022	0.0012402	8.89E-06	0.0001017	2.15E-06	0.0009401	0.000037	0.0004523	3.42E-06	0.0435076	0.00002	0.0002394	0.0000316
21978-01E	10-BRK-08	Burko	60a	15/01/2013	wr	12	4.06076	0.0757067	0.0760989	0.000064	1.22E-07	0.9984364	1.04E-15	1.02E-13	0.2099378	0.0019454	0.0788812	0.6091606	0.0164186	1.193955	0.0321804	0.0018958	9.38E-07	0.0526122	0.0011305	97.8159	0.6786022	35.19036	0.656809	35.96079	0.4775946	11.71599	1.000881	0.2397132	0.0004977	0.0024507	0.0000159	0.0001289	2.64E-06	0.0014928	0.0000391	0.0005145	3.41E-06	0.0539616	0.0000206	0.0005655	0.0000368
21978-01F	10-BRK-08	Burko	60a	16/01/2013	wr	17	3.173491	0.0406082	0.0410538	0.000064	1.22E-07	0.9983832	2.28E-15	1.50E-13	0.1289995	0.0007261	0.2366578	1.122712	0.0120851	2.200515	0.0236869	0.0032367	7.11E-07	0.0377159	0.0005321	65.90269	0.198326	27.49456	0.3521321	41.68708	0.3385493	11.73533	1.000882	0.3537425	0.000506	0.0053676	0.0000119	0.0002024	2.81E-06	0.0060263	0.0000634	0.0006924	3.57E-06	0.0803183	0.0000219	0.001268	0.0000328
21978-01G	10-BRK-08	Burko	60a	16/01/2013	wr	25	3.119382	0.0227891	0.0235477	0.000064	1.22E-07	0.9983562	6.19E-15	3.00E-13	0.0719924	0.0002945	0.2492634	0.6600771	0.0321794	1.293751	0.0630715	0.0060315	1.83E-06	0.0278956	0.000267	48.45745	0.105646	27.02536	0.1976081	55.74597	0.2020436	11.74518	1.000882	0.7067819	0.0006658	0.0145856	0.0000186	0.0004069	3.82E-06	0.0096276	0.0004699	0.0010501	4.05E-06	0.1595925	0.0000305	0.0034109	0.0000297
21978-01H	10-BRK-08	Burko	60a	16/01/2013	wr	35	3.449187	0.0230677	0.0239811	0.000064	1.22E-07	0.9982731	4.31E-15	1.93E-13	0.0498968	0.0003663	0.2986087	0.5481121	0.035981	1.0743	0.0705228	0.0039242	2.05E-06	0.0229864	0.0003201	44.72968	0.1537798	29.88543	0.2000608	66.78844	0.2606336	11.77548	1.000883	0.4535793	0.0004994	0.0101405	0.000029	0.0002331	3.17E-06	0.0055581	0.0003651	0.000506	3.41E-06	0.1019513	0.0000275	0.00227	0.0000298
21779-01A	10-BRK-11	Burko	58c	16/12/2012	matrix/wr	3	3.829526	0.0790925	0.0820336	0.0000637	3.63E-07	1.000534	5.18E-16	4.67E-14	0.1902914	0.0030646	0.0698593	0.489068	0.0999247	0.9585733	0.1958523	0.0040575	5.68E-06	0.0496394	0.0018378	90.11393	1.23992	33.34161	0.689347	36.98683	0.5676221	81.01275	1.001574	0.1098924	0.000184	0.0012195	0.0000166	0.0000605	2.08E-06	0.0005964	0.0001215	0.0002321	1.98E-06	0.0243112	0.0000291	0.0001922	0.000046
21779-01B	10-BRK-11	Burko	58c	17/12/2012	matrix/wr	5	3.556479	0.0492441	0.053233	0.0000637	3.63E-07	1.000498	8.99E-16	6.79E-14	0.1493113	0.0016314	0.0761414	0.4183013	0.0600107	0.8198706	0.1176209	0.0046304	3.41E-06	0.0420742	0.0011946	75.50538	0.6268326	30.962	0.429132	40.99454	0.4489333	81.15514	1.001575	0.1598403	0.0002051	0.0021169	0.0000173	0.0000891	2.42E-06	0.0008855	0.0001268	0.0003161	2.28E-06	0.0350311	0.0000297	0.0003244	0.0000433
21779-01C	10-BRK-11	Burko	58c	17/12/2012	matrix/wr	7	2.994563	0.0318666	0.0361299	0.0000637	3.63E-07	1.000480	1.31E-15	7.24E-14	0.0980336	0.0009159	0.0669448	0.241613	0.0447853	0.4735615	0.0877792	-0.0028382	2.55E-06	0.0297889	0.0008048	55.31645	0.3302752	26.066	0.2776109	47.11412	0.412602	81.22702	1.001575	0.1704269	0.0002204	0.0030809	0.0000179	0.0000918	2.42E-06	0.0007444	0.0001378	0.000302	2.21E-06	0.0376121	0.0000311	0.0007032	0.0000448
21779-01D	10-BRK-11	Burko	58c	17/12/2012	matrix/wr	9	2.735513	0.0260577	0.0303472	0.0000637	3.63E-07	1.000462	1.85E-15	8.03E-14	0.0653798	0.0006453	0.0859151	0.2068433	0.0316492	0.4054128	0.0620324	0.0038156	1.80E-06	0.0258968	0.0005209	43.31289	0.2762373	23.80941	0.2269738	54.96354	0.4024293	81.29831	1.001575	0.1890517	0.0003313	0.0043648	0.0000267	0.000113	2.16E-06	0.0009028	0.000138	0.0002854	2.21E-06	0.0416454	0.0000304	0.0009302	0.0000433
21779-01E	10-BRK-11	Burko	58c	17/12/2012	matrix/wr	12	2.594482	0.0168052	0.0223623	0.0000637	3.63E-07	1.000406	2.62E-15	9.46E-14	0.0454929	0.0004102	0.1956332	0.3275349	0.0244135	0.6419685	0.0478505	0.0012689	1.39E-06	0.0212452	0.0003575	36.13452	0.1231214	22.58102	0.1463687	62.47821	0.3525232	81.51974	1.001576	0.2227688	0.0002872	0.006165	0.0000192	0.000131	2.16E-06	0.0020192	0.0001503	0.0002805	2.37E-06	0.0487507	0.0000248	0.0011268	0.0000411
21779-01F	10-BRK-11	Burko	58c	17/12/2012	matrix/wr	17	2.427132	0.0181666	0.022815	0.0000637	3.63E-07	1.000388	2.53E-15	8.86E-14	0.0472721	0.0004316	1.277335	2.220267	0.0381794	4.351723	0.0748316	0.0046342	2.17E-06	0.0226659	0.0004484	35.02647	0.1684716	21.12351	0.1582114	60.21329	0.3497737	81.59125	1.001577	0.2086276	0.0002617	0.0059563	0.0000275	0.000135	2.59E-06	0.0132245	0.0002189	0.0002816	2.22E-06	0.0451358	0.0000228	0.0011724	0.0000411
21779-01G	10-BRK-11	Burko	58c	17/12/2012	matrix/wr	25	2.561419	0.0153235	0.0211414	0.0000637	3.63E-07	1.000370	2.46E-15	7.93E-14	0.0347626	0.0003621	3.860477	4.934165	0.0570442	9.670963	0.1118067	0.0064673	3.25E-06	0.0208172	0.0004832	32.19527	0.1096524	22.29305	0.1334616	69.00183	0.344565	81.66292	1.001577	0.186747	0.0001926	0.0058004	0.0000186	0.0001207	2.77E-06	0.0286204	0.0003176	0.0002016	2.00E-06	0.040676	0.0000228	0.0011299	0.0000398
21779-01H	10-BRK-11	Burko	58c	17/12/2012	matrix/wr	35	2.57528	0.0250081	0.0289803	0.0000637	3.63E-07	1.000352	1.34E-15	3.86E-14	0.0227697	0.0005677	4.502282	3.769289	0.0749855	7.387806	0.1469715	0.0044032	4.27E-06	0.0178801	0.0006429	28.84755	0.1729085	22.41377	0.2178118	77.49099	0.6293378	81.73508	1.001577	0.0909298	0.0001863	0.0031521	0.0000177	0.0000564	2.00E-06	0.0118811	0.0002267	0.0000718	1.74E-06	0.0198053	0.0000222	0.0007468	0.0000405
21781-01A	10-BRK-12	Burko	58c	17/12/2012	wr	3	4.299316	0.1599726	0.1618825	0.000063	3.64E-07	1.000315	3.61E-16	9.77E-14	0.7797576	0.0185114	0.074593	2.138731	0.1774818	4.191913	0.3478644	-0.0019459	0.0000101	0.1592061	0.0048138	270.4815	6.333626	37.86866	1.410729	13.97921	0.3690232	81.87954	1.001578	0.230164	0.0002542	0.0008509	0.0000199	0.0001355	2.59E-06	0.0018199	0.0001449	0.0006635	2.71E-06	0.0505796	0.0000248	0.0002177	0.000037
21781-01B	10-BRK-12	Burko	58c	17/12/2012	wr	5	3.756689	0.155196	0.1567012	0.000063	3.64E-07	1.000297	4.00E-16	1.20E-13	0.893813	0.0198093	0.047466	1.560102	0.1641073	3.0578	0.3216504	0.0263603	9.33E-06	0.1906038	0.0052155	299.823	6.556555	33.08418	1.368194	11.02236	0.3451147	81.9524	1.001578	0.2823193	0.0002544	0.0009416	0.0000206	0.0001795	2.95E-06	0.001469	0.0001511	0.0008416	3.15E-06	0.0619391	0.0000278	0.0001336	0.0000419
21781-01C	10-BRK-12	Burko	58c	17/12/2012	wr	7	3.035177	0.1014155	0.1029158	0.000063	3.64E-07	1.000279	6.72E-16	1.74E-13	0.7761425	0.0094052	0.0289018	0.8250355	0.0850279	1.61707	0.1666547	0.0138723	4.83E-06	0.1640289	0.0028587	258.4066	3.060624	26.72467	0.8937126	10.33606	0.269173	82.02463	1.001578	0.4085954	0.0004064	0.0015812	0.0000186	0.0002594	3.32E-06	0.0013046	0.0001335	0.0012272	3.42E-06	0.0895204	0.0000255	0.0002668	0.0000362
21781-01D	10-BRK-12	Burko	58c	17/12/2012	wr	9	2.834482	0.0623661	0.0644742	0.000063	3.64E-07	1.000221	1.29E-15	2.23E-13	0.4954305	0.0041747	0.015126	0.2758422	0.0442084	0.5406506	0.0866485	0.0071569	2.51E-06	0.1085407	0.0015762	172.8701	1.388152	24.95617	0.5495329	14.4336	0.2316889	82.25407	1.001579	0.5243648	0.0002555	0.0030333	0.0000242	0.0003292	3.98E-06	0.0008367	0.0001339	0.0015028	3.98E-06	0.1155645	0.0000332	0.0007504	0.0000609
21781-01E	10-BRK-12	Burko	58c	17/12/2012	wr	12	2.587278	0.0221357	0.0266985	0.000063	3.64E-07	1.000203	3.82E-15	2.87E-13	0.1756079	0.0006156	0.0324892	0.2100878	0.0169089	0.4117722	0.0331415	0.0042669	9.61E-07	0.0469405	0.0004581	75.19663	0.1871486	22.7781	0.1950198	30.28715	0.1892527	82.32749	1.00158	0.6755306	0.0003792	0.0089835	0.0000212	0.0004217	3.98E-06	0.0018873	0.0001518	0.0015776	4.07E-06	0.1489573	0.0000318	0.0019476	0.0000546
21781-01F	10-BRK-12	Burko	58c	17/12/2012	wr	17	2.536091	0.014479	0.0205849	0.000063	3.64E-07	1.000184	5.04E-15	2.31E-13	0.0791853	0.0003501	0.3591523	1.045905	0.0207097	2.049974	0.0405909	0.0033846	1.18E-06	0.0283302	0.0003294	45.87185	0.1357937	22.32714	0.1275592	48.63741	0.2064884	82.40154	1.00158	0.5447314	0.0005114	0.0118751	0.0000327	0.0003364	3.79E-06	0.0124202	0.0002435	0.0009403	3.25E-06	0.118685	0.0000305	0.0025981	0.0000552
21781-01G	10-BRK-12	Burko	58c	17/12/2012	wr	25	2.55379	0.0159781	0.0217346	0.000063	3.64E-07	1.000166	3.97E-15	1.71E-13	0.0706602	0.0003967	1.771057	4.601185	0.0489634	9.018322	0.0959684	0.0015517	2.80E-06	0.0259383	0.0003673	43.13637	0.1575982	22.48307	0.1407681	51.95125	0.2380861	82.47552	1.00158	0.4033206	0.0003612	0.0093499	0.0000327	0.0002425	3.32E-06	0.0430206	0.0004321	0.0006607	2.90E-06	0.0877938	0.0000298	0.0022033	0.0000539
21781-01H	10-BRK-12	Burko	58c	17/12/2012	wr	35	2.557742	0.0201489	0.0249748	0.000063	3.64E-07	1.000129	1.78E-15	5.63E-14	0.0317893	0.0004721	3.647682	4.263459	0.0822753	8.35638	0.1612597	0.0024315	4.68E-06	0.0188893	0.0005613	31.59666	0.1439016	22.51788	0.1775126	71.05222	0.4771719	82.62303	1.001581	0.1326645	0.0002254	0.0041987	0.0000176	0.0000793	2.33E-06	0.0179009	0.0003371	0.0001335	1.90E-06	0.0294049	0.0000354	0.0008251	0.000061
21780-01A	10-BRK-12	Burko	58c	19/12/2012	plag	3	1.69604	0.0813775	0.0819749	0.0000634	3.70E-07	1.001282	4.77E-16	3.04E-14	0.1640865	0.0025124	0.0404304	0.244232	0.1739693	0.4786947	0.3409798	0.0194167	9.89E-06	0.0499799	0.0016437	63.80585	0.8499511	14.82967	0.7118752	23.23809	1.087593	84.5035	1.001589	0.0716641	0.0005114	0.0011232	0.0000125	0.0000561	1.73E-06	0.0002743	0.0001951	0.0001843	1.92E-06	0.0157093	0.0000308	0.0002561	0.0000566
21780-01B	10-BRK-12	Burko	58c	19/12/2012	plag	5	2.228947	0.0974855	0.098346	0.0000634	3.70E-07	1.001239	4.18E-16	4.12E-14	0.2644534	0.0041493	0.0210267	0.2047647	0.1955041	0.4013388	0.383188	0.0127606	0.0000111	0.0667058	0.0019851	98.44181	1.445832	19.49213	0.853037	19.79793	0.8166378	84.57753	1.001589	0.096934	0.0005096	0.0009847	0.0000134	0.0000657	1.73E-06	0.0002016	0.0001923	0.0002604	1.99E-06	0.0215597	0.0000302	0.0000636	0.0000488
21780-01C	10-BRK-12	Burko	58c	19/12/2012	plag	7	2.572919	0.0430476	0.0455805	0.0000634	3.70E-07	1.001197	9.48E-16	5.24E-14	0.1099557	0.001022	0.0297118	0.1204418	0.0863114	0.2360658	0.1691703	-0.0005364	4.91E-06	0.0328467	0.0007916	55.32522	0.3465222	22.50231	0.3767553	40.66984	0.6682389	84.65173	1.00159	0.1234907	0.0005279	0.0022321	0.0000101	0.0000733	1.73E-06	0.0002688	0.0001924	0.0002454	1.99E-06	0.0275937	0.0000292	0.0004693	0.0000532
21780-01D	10-BRK-12	Burko	58c	19/12/2012	plag	9	2.599721	0.0243923	0.0287084	0.0000634	3.70E-07	1.001155	1.91E-15	7.88E-14	0.0621881	0.0005225	0.0456239	0.1046433	0.044781	0.2051008	0.0877707	0.0038132	2.55E-06	0.0252953	0.000463	41.29742	0.2246221	22.73688	0.2134864	55.05327	0.4760253	84.72541	1.00159	0.1854539	0.0005701	0.0044907	0.00002	0.0001136	2.01E-06	0.0004699	0.0002009	0.0002793	1.99E-06	0.0413891	0.0000297	0.0009097	0.0000525
21780-01E	10-BRK-12	Burko	58c	19/12/2012	plag	12	2.592877	0.0134666	0.0202319	0.0000634	3.70E-07	1.001070	3.56E-15	9.75E-14	0.015692	0.0002164	0.0709989	0.041292	0.0234654	0.0809323	0.0459922	0.0026543	1.33E-06	0.0160872	0.0002564	27.35947	0.1095279	22.67698	0.1178615	82.88502	0.4008525	84.87383	1.001591	0.2295763	0.0005784	0.0083911	0.0000258	0.000135	2.11E-06	0.0003465	0.0001967	0.0001317	1.77E-06	0.0498218	0.0000262	0.0016531	0.0000453
21780-01F	10-BRK-12	Burko	58c	19/12/2012	plag	17	2.59829	0.0072968	0.0167981	0.0000634	3.70E-07	1.001027	6.42E-15	1.54E-13	0.0039774	0.0001077	0.1329103	0.0197672	0.0130766	0.0387437	0.0256302	0.0025389	7.43E-07	0.0138284	0.000166	23.91086	0.055814	22.72436	0.0638628	95.03929	0.2924431	84.94885	1.001591	0.3616609	0.0006793	0.0151254	0.00002	0.0002092	2.49E-06	0.000299	0.0001976	0.0000602	1.63E-06	0.079072	0.0000269	0.0032317	0.0000411
21780-01G	10-BRK-12	Burko	58c	19/12/2012	plag	25	2.602213	0.007416	0.0168707	0.0000634	3.70E-07	1.000985	1.25E-14	2.93E-13	0.0023365	0.000058	0.2247279	0.0196361	0.0066626	0.0384868	0.0130587	0.0017341	3.79E-07	0.0132399	0.0001299	23.45521	0.0630623	22.75869	0.0649063	97.032	0.3099732	85.02355	1.001591	0.6893559	0.0014864	0.0293903	0.0000455	0.0003891	3.76E-06	0.0005771	0.0001956	0.0000687	1.70E-06	0.1543519	0.000029	0.0063099	0.0000398
21780-01H	10-BRK-12	Burko	58c	19/12/2012	plag	35	2.58664	0.0093147	0.0177102	0.0000634	3.70E-07	1.000851	5.22E-15	1.20E-13	0.001294	0.0001241	0.4952509	0.0238937	0.0158924	0.0468317	0.0311491	0.003153	9.03E-07	0.0135315	0.0001982	23.00722	0.0733552	22.6224	0.0815235	98.32873	0.3038251	85.25775	1.001592	0.2827277	0.0005184	0.0122886	0.0000316	0.0001663	2.39E-06	0.0002936	0.0001951	0.0000159	1.52E-06	0.0626035	0.0000226	0.0028355	0.0000436
21980-01A	10-BRK-14	Burko	60a	16/01/2013	wr	3	1.352828	1.800332	1.800334	0.0000628	1.14E-07	0.9979777	1.68E-16	3.33E-13	6.614777	0.1862284	0.0050602	1.230924	0.0921823	2.41261	0.1806774	0.0266483	5.25E-06	1.274838	0.0375393	1987.065	55.94741	11.93619	15.89054	0.600169	0.2191419	11.8839	1.000886	0.7849133	0.0007247	0.000395	0.0000112	0.0005036	4.38E-06	0.0004862	0.0000338	0.0026129	5.23E-06	0.7499009	0.014554	0.0011898	0.0001132
21980-01B	10-BRK-14	Burko	60a	16/01/2013	wr	5	2.927166	0.6987212	0.6987414	0.0000628	1.14E-07	0.9979506	5.37E-16	4.19E-13	2.527154	0.0283826	0.0071367	0.6634063	0.0287075	1.300276	0.0562667	0.0133004	1.64E-06	0.4956545	0.0067559	780.4061	8.784716	25.83807	6.172611	3.309291	0.1955377	11.89391	1.000886	0.9876221	0.0007716	0.0012655	0.0000141	0.0006273	4.87E-06	0.0008396	0.0000352	0.0031982	5.94E-06	0.9475558	0.017521	0.0017536	0.0001026
21980-01C	10-BRK-14	Burko	60a	16/01/2013	wr	7	3.580552	0.4413015	0.4413494	0.0000628	1.14E-07	0.9978968	6.87E-16	3.34E-13	1.524056	0.0107937	0.0223108	1.250436	0.0301613	2.450854	0.0591162	0.0158477	1.74E-06	0.3064223	0.0032732	486.5807	3.443632	31.61123	3.899938	6.490841	0.2115914	11.91377	1.000887	0.7873031	0.0006402	0.001618	0.000011	0.0004958	4.00E-06	0.0020232	0.0000469	0.002466	5.16E-06	0.7693788	0.0126898	0.0009799	0.000117
21980-01D	10-BRK-14	Burko	60a	16/01/2013	wr	9	3.512647	0.4089086	0.4089583	0.0000628	1.14E-07	0.9978696	7.52E-16	3.35E-13	1.388578	0.013383	0.0424509	2.167476	0.0352016	4.248253	0.0689951	0.0217294	2.06E-06	0.2827401	0.0035635	445.4313	4.293555	31.01114	3.613534	6.951331	0.2049485	11.92385	1.000887	0.7889871	0.0005677	0.0017713	0.0000167	0.0005008	4.10E-06	0.0038392	0.0000508	0.0024596	5.07E-06	0.7795777	0.012704	0.0017732	0.0001415
21980-01E	10-BRK-14	Burko	60a	16/01/2013	wr	12	3.473788	0.3675833	0.3676374	0.0000628	1.14E-07	0.9978421	1.34E-15	5.35E-13	1.239914	0.0101125	0.0393406	1.793678	0.0257852	3.515609	0.0505389	0.0169383	1.52E-06	0.2529314	0.0026813	400.7345	3.300834	30.66774	3.248272	7.643139	0.1692823	11.934	1.000888	1.260162	0.0007664	0.0031446	0.0000251	0.0007954	5.35E-06	0.0056405	0.0000675	0.0038991	6.67E-06	1.253397	0.0218828	0.0034067	0.0001294
21980-01F	10-BRK-14	Burko	60a	17/01/2013	wr	17	3.06828	0.2349706	0.2350367	0.0000628	1.14E-07	0.9977572	2.79E-15	6.90E-13	0.7364801	0.0043424	0.05101	1.381504	0.0139994	2.707747	0.0274388	0.0285737	8.63E-07	0.1615597	0.0013195	246.867	1.524783	27.08474	2.075929	10.96065	0.225501	11.9655	1.000889	1.623627	0.0025461	0.0065769	0.0000368	0.0010626	5.94E-06	0.0090861	0.0000765	0.0048438	8.83E-06	1.69783	0.0535549	0.0066338	0.0002674
21980-01G	10-BRK-14	Burko	60a	17/01/2013	wr	25	3.159402	0.4301444	0.4301827	0.0000628	1.14E-07	1.0000000	1.43E-14	1.39E-12	0.2334738	0.0013482	0.0573295	0.4924248	0.0030574	0.9651525	0.0059925	0.0164865	2.12E-07	0.0621083	0.0005104	97.55838	3.729386	27.88981	3.800451	28.57801	3.984614	11.97569	1.000889	3.282633	0.1262383	0.0336479	0.0000685	0.0020898	0.0000161	0.0165691	0.0000957	0.0078559	0.0000421	3.191024	0.1239852	0.0304797	0.0013363
21980-01H	10-BRK-14	Burko	60a	17/01/2013	wr	35	1.391571	0.1129565	0.1129848	0.0000628	1.14E-07	0.9977037	3.36E-15	3.10E-13	0.2688746	0.0013535	0.1229405	1.215611	0.0106218	2.382597	0.0208187	0.0119352	6.76E-07	0.0672179	0.0006071	92.45817	0.692308	12.27815	0.9970264	13.26831	0.7069061	11.98536	1.000889	0.7307865	0.0046256	0.007904	0.0000271	0.0005313	4.30E-06	0.0096081	0.0000767	0.0021252	7.71E-06	0.951099	0.0438799	0.0084712	0.0004622
21979-01A	10-BRK-14	Burko	60a	15/01/2013	plag	3	3.540866	2.996722	2.99673	0.0000638	1.25E-07	0.9987351	8.90E-17	9.48E-14	3.466904	0.1634493	0.0076367	0.9737064	0.274822	1.908464	0.538651	-0.0418467	0.0000156	0.6547082	0.0343799	1065.939	51.84304	30.78632	26.0808	2.886192	2.398189	11.60791	1.000878	0.2232922	0.0042847	0.0002095	9.40E-06	0.0001371	3.78E-06	0.000204	0.0000569	0.0007262	0.0000108	0.049822	0.0000297	0.000024	0.0000434
21979-01B	10-BRK-14	Burko	60a	16/01/2013	plag	5	3.658992	0.1876229	0.1877596	0.0000638	1.25E-07	0.9982462	5.06E-16	1.09E-13	0.6141809	0.007089	0.0440374	0.9947052	0.0328567	1.949622	0.0643991	0.0136369	1.88E-06	0.1332491	0.0025446	215.1124	2.296967	31.81442	1.63301	14.77927	0.4686752	11.78532	1.000883	0.2562187	0.00049	0.0011911	0.0000124	0.0001587	2.54E-06	0.0011848	0.0000372	0.0007315	3.67E-06	0.2578269	0.0077846	0.0015939	0.0001135
21979-01C	10-BRK-14	Burko	60a	16/01/2013	plag	7	3.701572	0.0988724	0.0991376	0.0000638	1.25E-07	0.9982191	7.97E-16	8.53E-14	0.2507855	0.0027146	0.1283269	1.183512	0.0238291	2.319684	0.046705	0.0022188	1.37E-06	0.0604408	0.0013063	106.9496	0.905026	32.18503	0.8605737	30.06852	0.5773187	11.79523	1.000884	0.2008304	0.0005035	0.0018778	0.0000149	0.0001135	2.28E-06	0.0022224	0.0000412	0.0004709	3.47E-06	0.2009757	0.0050245	0.0021661	0.0001032
21979-01D	10-BRK-14	Burko	60a	16/01/2013	plag	9	3.857648	0.0633275	0.0637764	0.0000638	1.25E-07	0.9981661	1.12E-15	7.82E-14	0.1225104	0.0014326	0.2402352	1.082365	0.0176796	2.121435	0.034652	0.0047389	1.03E-06	0.0370058	0.000867	70.01339	0.4949631	33.54356	0.5512431	47.87383	0.5928247	11.81465	1.000884	0.1841363	0.0004955	0.00263	0.0000167	0.0000973	2.20E-06	0.0028466	0.0000429	0.0003222	3.17E-06	0.1801158	0.0034067	0.0037986	0.0001124
21979-01E	10-BRK-14	Burko	60a	16/01/2013	plag	12	4.128553	0.0279729	0.0291173	0.0000638	1.25E-07	0.9981392	3.50E-15	1.88E-13	0.0596009	0.0004345	0.2233627	0.4897664	0.0059449	0.9599421	0.0116519	0.0008435	3.51E-07	0.0237653	0.0003436	53.64774	0.1509432	35.90187	0.2435305	66.89907	0.2799264	11.82453	1.000884	0.4420777	0.00057	0.0082404	0.0000149	0.0001958	2.80E-06	0.0040359	0.0000484	0.0004911	3.46E-06	0.4278724	0.0075814	0.0093333	0.0001758
21979-01F	10-BRK-14	Burko	60a	16/01/2013	plag	17	4.885578	0.0972072	0.0976765	0.0000638	1.25E-07	1.0000000	2.11E-14	1.00E-12	0.016741	0.0000808	0.174959	0.1080155	0.0012255	0.2117104	0.0024019	0.0017488	7.28E-08	0.0159711	0.0001144	47.4816	0.8435445	42.49386	0.8466362	89.4899	2.375691	11.83451	1.000885	2.357837	0.0419067	0.0496579	0.0000575	0.0007931	5.45E-06	0.0053638	0.0000605	0.0008313	3.87E-06	2.343112	0.0416468	0.0533919	0.0009257
21979-01G	10-BRK-14	Burko	60a	16/01/2013	plag	25	4.463751	0.0929159	0.0933259	0.0000638	1.25E-07	1.0000000	3.84E-14	1.58E-12	0.0075505	0.0000411	0.1456107	0.0407525	0.0006027	0.079875	0.0011814	0.0022247	3.53E-08	0.0143963	0.0000785	41.07132	0.8077308	38.82035	0.8090713	94.51826	2.702073	11.86429	1.000886	3.714396	0.0732379	0.0904377	0.0000704	0.001302	6.62E-06	0.0036856	0.0000544	0.0006829	3.65E-06	3.692291	0.072805	0.0934076	0.0018318
21979-01H	10-BRK-14	Burko	60a	16/01/2013	plag	35	3.738559	0.0249386	0.0259907	0.0000638	1.25E-07	0.9980047	7.85E-15	2.68E-13	0.0054676	0.00016	0.0364794	0.0076649	0.0017603	0.0150231	0.0034501	0.0055009	1.00E-07	0.0151327	0.000189	34.13957	0.2134902	32.50697	0.217067	95.2193	0.5923354	11.87395	1.000886	0.6309077	0.0026424	0.0184802	0.0000794	0.0002797	3.25E-06	0.0001416	0.0000326	0.000101	2.93E-06	0.7062998	0.0140412	0.0196101	0.0003958
21981-01A	10-BRK-16	Burko	60a	17/01/2013	matrix	3	0.5813796	0.9843325	0.984333	0.0000621	1.06E-07	0.9976764	4.16E-16	3.87E-13	3.102329	0.0590489	0.0037723	0.430587	0.0384837	0.8439504	0.075428	0.1015126	2.19E-06	0.6350775	0.0130796	931.5409	17.78531	5.190355	8.789194	0.5570095	0.224311	11.99552	1.00089	0.9117433	0.0010506	0.0009787	0.0000186	0.0006216	4.88E-06	0.0004214	0.0000369	0.0030364	5.90E-06	0.2046206	0.000161	0.000154	0.0000382
21981-01B	10-BRK-16	Burko	60a	17/01/2013	matrix	5	1.653823	0.5122978	0.5123055	0.0000621	1.06E-07	0.9976220	7.74E-16	3.68E-13	1.542806	0.0175805	0.017316	0.9825085	0.0254152	1.925717	0.0498138	0.0307667	1.47E-06	0.3151308	0.0043594	475.3771	5.493783	14.76914	4.577073	3.104662	0.2606689	12.01581	1.00089	0.8661722	0.0014846	0.0018221	0.0000205	0.0005742	4.49E-06	0.0017902	0.0000418	0.0028111	5.74E-06	0.1937583	0.000151	0.0005795	0.0000405
21981-01C	10-BRK-16	Burko	60a	17/01/2013	matrix	7	1.923756	0.2393205	0.2393429	0.0000621	1.06E-07	0.9975950	1.22E-15	2.73E-13	0.689629	0.0056579	0.0477331	1.210556	0.020948	2.37269	0.0410581	0.0170433	1.23E-06	0.1487124	0.0019144	222.9988	1.851978	17.18101	2.138505	7.697928	0.306746	12.02586	1.00089	0.6418823	0.001207	0.0028784	0.0000224	0.0004281	4.31E-06	0.0034845	0.0000539	0.001985	5.23E-06	0.1441723	0.000141	0.0007497	0.0000354
21981-01D	10-BRK-16	Burko	60a	17/01/2013	matrix	9	2.054488	0.1607366	0.1607746	0.0000621	1.06E-07	0.9975682	1.80E-15	2.77E-13	0.4550966	0.0026999	0.0650951	1.08947	0.0142336	2.135362	0.0278978	0.0135683	8.60E-07	0.1030752	0.001273	154.1437	0.9197108	18.34924	1.436404	11.89482	0.2730887	12.03587	1.000891	0.6530057	0.0009433	0.0042363	0.0000224	0.0004367	4.79E-06	0.0046154	0.0000551	0.0019279	5.07E-06	0.1465213	0.0001113	0.0010532	0.0000361
21981-01E	10-BRK-16	Burko	60a	17/01/2013	matrix	12	2.305566	0.0281922	0.0284639	0.0000621	1.06E-07	1.0000000	2.76E-15	2.38E-13	0.219895	0.0009721	0.1286287	1.040215	0.0106835	2.03882	0.0209396	0.0044727	6.07E-07	0.0553701	0.0006106	86.15699	0.2546024	20.59313	0.2519712	23.88439	0.2858938	12.06763	1.000892	0.5601121	0.0006022	0.0065011	0.0000179	0.00036	3.84E-06	0.0067625	0.0000669	0.0014296	4.95E-06	0.1245469	0.0000598	0.0015023	0.0000404
21981-01F	10-BRK-16	Burko	60a	17/01/2013	matrix	17	2.31445	0.0182663	0.0186861	0.0000621	1.06E-07	1.0000000	4.38E-15	2.28E-13	0.1053561	0.0005326	0.3659378	1.41775	0.0096738	2.778791	0.0189606	0.00636	5.50E-07	0.0343005	0.0003599	51.99767	0.1706404	20.67254	0.1632586	39.71712	0.2974353	12.07782	1.000892	0.536624	0.0008052	0.0103202	0.0000301	0.000354	3.57E-06	0.0146314	0.0000902	0.0010873	4.49E-06	0.1194747	0.0000684	0.0023249	0.0000431
21981-01G	10-BRK-16	Burko	60a	17/01/2013	matrix	25	2.349551	0.0111109	0.0118084	0.0000621	1.06E-07	1.0000000	7.06E-15	2.64E-13	0.0552692	0.0002836	0.1639251	0.3334203	0.056013	0.6535038	0.1097854	0.0047723	3.18E-06	0.0243056	0.0002502	37.45886	0.1005728	20.98626	0.0993077	56.01259	0.2342992	12.08798	1.000892	0.6225648	0.0006728	0.01662	0.0000408	0.000404	4.04E-06	0.0055414	0.0009308	0.0009186	4.14E-06	0.1381336	0.0000316	0.0036481	0.0000516
21981-01H	10-BRK-16	Burko	60a	17/01/2013	matrix	35	2.359745	0.0259589	0.0262676	0.0000621	1.06E-07	1.0000000	2.30E-15	1.00E-13	0.0767588	0.0006977	0.9545018	2.693951	0.01735	5.280143	0.0340059	0.006815	9.86E-07	0.0289864	0.0005161	43.73987	0.1468549	21.07737	0.2320179	48.09647	0.5290851	12.09798	1.000893	0.2366074	0.0005583	0.0054094	0.0000129	0.0001568	2.77E-06	0.0145727	0.0000872	0.0004152	3.64E-06	0.0522337	0.0000262	0.0010987	0.0000397
MONDULI
21982-01A	10-MON-02	Monduli	60a	17/01/2013	wr	3	2.204058	0.1986001	0.198645	0.0000623	1.19E-07	0.9955260	6.10E-16	1.34E-13	0.6670841	0.0099237	0.0142023	0.3486445	0.0229102	0.6833433	0.0449039	0.0117987	1.30E-06	0.1426667	0.0027007	218.7819	3.154114	19.61642	1.768648	8.964005	0.39797	12.11845	1.000893	0.3144033	0.0003459	0.0014371	0.0000208	0.000205	2.55E-06	0.000501	0.0000323	0.0009586	4.03E-06	0.0715965	0.0000468	0.0004963	0.0000389
21982-01B	10-MON-02	Monduli	60a	17/01/2013	wr	5	2.458269	0.1320346	0.1321185	0.0000623	1.19E-07	0.9955490	1.18E-15	1.87E-13	0.4566746	0.0037627	0.0110898	0.1865247	0.0118803	0.3655883	0.0232854	0.0109091	6.76E-07	0.102494	0.0013567	158.2308	1.211625	21.88047	1.17601	13.82643	0.3320113	12.12871	1.000893	0.4398935	0.0004689	0.0027801	0.0000207	0.0002849	3.12E-06	0.0005186	0.000033	0.0012696	4.64E-06	0.0989138	0.000066	0.0007474	0.0000389
21982-01C	10-MON-02	Monduli	60a	17/01/2013	wr	7	2.464866	0.0544944	0.0546984	0.0000623	1.19E-07	0.9955721	2.79E-15	2.11E-13	0.1797296	0.0010525	0.0143222	0.0949691	0.0053472	0.1861395	0.0104805	0.0045707	3.05E-07	0.047831	0.0005786	75.59983	0.3788435	21.93923	0.4853744	29.01853	0.2713497	12.13901	1.000894	0.4970969	0.0004512	0.0065754	0.0000306	0.0003145	3.50E-06	0.0006245	0.0000352	0.0011818	4.24E-06	0.1125284	0.0000478	0.0014957	0.0000369
21982-01D	10-MON-02	Monduli	60a	17/01/2013	wr	9	2.489656	0.0287364	0.029129	0.0000623	1.19E-07	0.9956422	4.67E-15	2.25E-13	0.0874934	0.000446	0.0190596	0.0616404	0.0030476	0.1208152	0.0059734	0.0012157	1.74E-07	0.0291967	0.0003484	48.28118	0.1689039	22.16003	0.2559543	45.89652	0.2295595	12.17038	1.000895	0.5307414	0.0002946	0.0109927	0.0000332	0.000321	3.70E-06	0.0006776	0.0000336	0.0009618	3.94E-06	0.1203561	0.0000219	0.0022516	0.0000319
21982-01E	10-MON-02	Monduli	60a	17/01/2013	wr	12	2.47164	0.0217169	0.0222265	0.0000623	1.19E-07	0.9956651	6.52E-15	2.64E-13	0.0616283	0.0003083	0.0258678	0.0589417	0.0023342	0.1155258	0.0045751	0.0045232	1.33E-07	0.0254359	0.0002455	40.3974	0.1294461	21.99957	0.1934301	54.45654	0.208607	12.18064	1.000895	0.6206274	0.0004414	0.0153631	0.0000406	0.0003908	3.60E-06	0.0009055	0.0000359	0.0009468	4.00E-06	0.1402125	0.0000264	0.0033974	0.0000358
21982-01F	10-MON-02	Monduli	60a	17/01/2013	wr	17	2.451117	0.0154693	0.0161655	0.0000623	1.19E-07	0.9956880	9.89E-15	3.33E-13	0.0397965	0.0001958	0.0639223	0.0938572	0.0018542	0.1839601	0.0036341	0.0008611	1.07E-07	0.0200346	0.0001849	33.69207	0.0859904	21.81677	0.1377817	64.75048	0.1818769	12.19092	1.000895	0.7842778	0.0005662	0.0232778	0.0000415	0.0004664	4.19E-06	0.0021848	0.0000431	0.0009264	4.22E-06	0.1756486	0.000028	0.0050179	0.0000326
21982-01G	10-MON-02	Monduli	60a	18/01/2013	wr	25	2.427711	0.010647	0.0116175	0.0000623	1.19E-07	0.9957111	1.58E-14	4.42E-13	0.0213499	0.0001119	0.4656821	0.3658557	0.002074	0.7170773	0.0040651	0.0011863	1.36E-07	0.01664	0.0001338	27.94898	0.0643792	21.6083	0.0948298	77.29522	0.1970868	12.20129	1.000896	1.039677	0.0013191	0.0371991	0.0000359	0.000619	4.87E-06	0.0136095	0.0000755	0.0007942	4.07E-06	0.2349128	0.0000297	0.0081764	0.000029
21982-01H	10-MON-02	Monduli	60a	18/01/2013	wr	35	2.438463	0.0091587	0.0102801	0.0000623	1.19E-07	0.9957568	9.26E-15	2.37E-13	0.0131029	0.0001488	0.2100159	0.1015015	0.0184322	0.198943	0.0361272	0.0009019	1.05E-06	0.0149899	0.0001533	25.60764	0.0541158	21.70407	0.0815744	84.75244	0.197702	12.22183	1.000896	0.5581461	0.0004147	0.0217961	0.0000244	0.0003267	3.31E-06	0.0022123	0.0004035	0.0002856	3.22E-06	0.1256117	0.0000241	0.0049244	0.0000347
21782-01A	10-MON-03	Monduli	58c	17/12/2012	matrix	3	2.363149	0.1034952	0.1045457	0.0000629	3.94E-07	1.000111	5.49E-16	1.07E-13	0.5813385	0.0095469	0.0969389	2.072182	0.1272363	4.061477	0.2493832	0.0080906	7.23E-06	0.1250692	0.0030848	194.2352	3.098018	20.83998	0.9132944	10.71348	0.3822707	82.69708	1.001581	0.2511015	0.0002738	0.0012928	0.0000206	0.0001617	3.05E-06	0.0026789	0.0001589	0.0007515	3.08E-06	0.0556059	0.000034	0.0001045	0.000066
21782-01B	10-MON-03	Monduli	58c	18/12/2012	matrix	5	2.428981	0.0162305	0.0222332	0.0000629	3.94E-07	1.000092	2.94E-15	1.21E-13	0.0669875	0.0004085	0.5206443	1.282561	0.0302103	2.51382	0.0592122	0.0024404	1.72E-06	0.0256835	0.0004208	41.30108	0.1274925	21.42093	0.1432317	51.8189	0.281947	82.77178	1.001582	0.2857593	0.0002741	0.0069189	0.0000199	0.0001777	2.86E-06	0.008874	0.0002074	0.0004635	2.49E-06	0.0624808	0.0000361	0.0013983	0.0000669
21782-01C	10-MON-03	Monduli	58c	18/12/2012	matrix	7	2.441325	0.0075866	0.0170526	0.0000629	3.94E-07	1.000000	5.38E-15	1.40E-13	0.0154551	0.0001322	1.507982	0.8571714	0.0173196	1.680056	0.0339464	0.0023217	9.84E-07	0.0158945	0.000239	26.06291	0.0659472	21.52987	0.0669513	82.5592	0.1640058	82.99977	1.001583	0.3303076	0.0001938	0.0126735	0.0000312	0.0002014	2.99E-06	0.0108633	0.0002179	0.0001959	1.60E-06	0.073232	0.0000405	0.0027378	0.0000624
21782-01D	10-MON-03	Monduli	58c	18/12/2012	matrix	9	2.429468	0.0054867	0.016158	0.0000629	3.94E-07	1.000000	5.47E-15	1.31E-13	0.0084589	0.0000969	2.44697	0.7613089	0.0145358	1.492165	0.0284902	0.0018355	8.26E-07	0.014405	0.0002105	23.87843	0.0416708	21.42523	0.0484189	89.68038	0.1820528	83.07419	1.001583	0.3075256	0.0003123	0.0128788	0.0000183	0.0001855	2.70E-06	0.0098047	0.0001867	0.0001089	1.24E-06	0.0682675	0.000041	0.0028572	0.0000701
21782-01E	10-MON-03	Monduli	58c	18/12/2012	matrix	12	2.431797	0.0076222	0.0170152	0.0000629	3.94E-07	1.000000	4.98E-15	1.19E-13	0.0087104	0.0001005	2.473595	0.7924619	0.0180475	1.553225	0.0353731	0.0011765	1.03E-06	0.0142241	0.0002247	23.97107	0.0660764	21.44578	0.0672648	89.41749	0.2004093	83.14905	1.001583	0.2810796	0.0003322	0.0117258	0.0000292	0.0001668	2.60E-06	0.0092922	0.0002104	0.0001021	1.15E-06	0.0618851	0.0000416	0.0024964	0.0000731
21782-01F	10-MON-03	Monduli	58c	18/12/2012	matrix	17	2.417828	0.0112978	0.0188789	0.0000629	3.94E-07	1.000000	2.92E-15	8.10E-14	0.0217982	0.0002076	1.835959	1.47168	0.0265424	2.884492	0.0520231	0.0022999	1.51E-06	0.0170641	0.0003279	27.69057	0.102222	21.32251	0.099701	76.92418	0.2517364	83.2237	1.001584	0.1906866	0.0002134	0.0068863	0.0000242	0.0001175	2.22E-06	0.0101345	0.0001793	0.0001501	1.33E-06	0.0423218	0.0000434	0.0014597	0.0000786
21782-01G	10-MON-03	Monduli	58c	18/12/2012	matrix	25	2.393793	0.0334926	0.0366879	0.0000629	3.94E-07	1.000000	1.25E-15	4.52E-14	0.0513978	0.0007032	2.386681	4.510259	0.0983444	8.840107	0.1927551	0.0023771	5.59E-06	0.0225764	0.000664	36.025	0.2885407	21.11041	0.2955611	58.41257	0.7945678	83.37155	1.001584	0.1063403	0.0005498	0.0029518	0.0000181	0.0000666	1.92E-06	0.0133136	0.0002786	0.0001517	1.86E-06	0.023582	0.0000463	0.0004257	0.0000787
21782-01H	10-MON-03	Monduli	58c	18/12/2012	matrix	35	2.39327	0.1561652	0.1568812	0.0000629	3.94E-07	1.000000	2.42E-16	9.75E-15	0.0672098	0.0031482	3.422413	8.456932	0.4468494	16.57559	0.8758249	0.0150836	0.0000254	0.029794	0.0021704	40.36223	1.262152	21.10579	1.378105	51.97743	3.477591	83.44585	1.001585	0.0229637	0.0005617	0.0005689	0.0000111	0.000017	1.19E-06	0.0048115	0.0002363	0.0000382	1.63E-06	0.0052205	0.0000458	0.0001824	0.0000814
21996-01A	10-MON-04	Monduli	60b	11/02/2013	matrix	3	2.640471	0.2189075	0.2189362	0.000063	8.47E-08	1.000000	2.07E-16	2.27E-14	0.2903417	0.0083302	0.0113024	0.120978	0.0530995	0.2371169	0.104075	-0.0013531	3.02E-06	0.0667482	0.0034625	109.9246	2.798845	23.23679	1.92785	21.13716	1.665129	19.6473	1.001066	0.0534968	0.0005299	0.0004867	0.0000113	0.0000325	1.49E-06	0.0000589	0.0000257	0.0001413	2.35E-06	0.0114676	0.0000272	0.000349	0.0000434
21996-01B	10-MON-04	Monduli	60b	11/02/2013	matrix	5	3.001442	0.2333296	0.2333644	0.000063	8.47E-08	1.000000	1.90E-16	1.91E-14	0.2476858	0.0070805	0.0289997	0.2644062	0.0684736	0.5182362	0.1342083	0.0085302	3.89E-06	0.0620671	0.0033753	100.3518	2.331106	26.41607	2.055272	26.31869	1.981568	19.67164	1.001067	0.0450043	0.0005434	0.0004485	8.75E-06	0.0000278	1.40E-06	0.0001186	0.0000305	0.0001111	2.30E-06	0.0095017	0.0000255	0.0000427	0.0000403
21996-01C	10-MON-04	Monduli	60b	11/02/2013	matrix	7	2.502132	0.1298356	0.1298791	0.000063	8.47E-08	1.000000	4.12E-16	2.50E-14	0.129807	0.0033391	0.0734553	0.3508837	0.0362255	0.687732	0.071002	0.0156043	2.06E-06	0.0421649	0.0020523	60.74693	1.146279	22.01853	1.143334	36.23771	1.809055	19.9279	1.001071	0.0588711	0.0006655	0.0009691	0.0000143	0.0000409	1.88E-06	0.00034	0.0000346	0.0001258	2.64E-06	0.0143376	0.0000875	0.0001242	0.0000515
21996-01D	10-MON-04	Monduli	60b	11/02/2013	matrix	9	2.4368	0.0599557	0.0600449	0.000063	8.47E-08	1.000000	1.04E-15	4.34E-14	0.067763	0.0012912	0.1028871	0.2566529	0.0165007	0.5030397	0.0323415	0.0098784	9.39E-07	0.028437	0.0008905	41.65389	0.5084776	21.44322	0.5279511	51.471	1.197523	19.94163	1.001072	0.1022506	0.0007926	0.0024548	0.0000224	0.0000698	2.07E-06	0.00063	0.0000399	0.0001663	2.77E-06	0.0244033	0.000131	0.0005422	0.000052
21996-01E	10-MON-04	Monduli	60b	12/02/2013	matrix	12	2.437893	0.020069	0.0203344	0.000063	8.47E-08	1.006019	3.31E-15	1.30E-13	0.0594312	0.0004502	0.0921755	0.2017325	0.0059398	0.3953957	0.0116421	0.0065563	3.38E-07	0.0257148	0.0003723	39.18086	0.1754182	21.45285	0.1767218	54.74653	0.3713015	19.99583	1.001073	0.3051933	0.000599	0.0077893	0.0000301	0.0002003	2.75E-06	0.0015714	0.0000456	0.0004629	3.00E-06	0.0686738	0.0001209	0.0016239	0.0000403
21996-01F	10-MON-04	Monduli	60b	12/02/2013	matrix	17	2.475666	0.0129761	0.0133954	0.000063	8.47E-08	1.006011	8.05E-15	3.07E-13	0.0548381	0.00024	0.0877174	0.1771797	0.0035542	0.3472721	0.0069662	0.0092041	2.03E-07	0.0257584	0.0001999	38.14427	0.1089587	21.78547	0.1142657	57.10722	0.2209448	20.01282	1.001073	0.7229442	0.0009601	0.0189529	0.0000447	0.0004882	3.54E-06	0.0033581	0.0000665	0.0010393	3.79E-06	0.1568928	0.0001607	0.0040126	0.0000369
21996-01G	10-MON-04	Monduli	60b	12/02/2013	matrix	25	2.475741	0.0089055	0.0095061	0.000063	8.47E-08	1.005995	8.26E-15	2.80E-13	0.0406855	0.0001566	0.1227551	0.1839479	0.002963	0.3605379	0.0058076	0.0071419	1.69E-07	0.0223651	0.0001805	33.91818	0.0570511	21.78614	0.0784211	64.22439	0.1742447	20.04722	1.001074	0.6595246	0.0006271	0.0194446	0.0000225	0.0004349	3.42E-06	0.0035768	0.0000571	0.0007911	2.89E-06	0.142064	0.000056	0.0040779	0.000041
21996-01H	10-MON-04	Monduli	60b	12/02/2013	matrix	35	2.473738	0.0119716	0.0124242	0.000063	8.47E-08	1.005988	3.14E-15	9.18E-14	0.0250331	0.0002359	0.3109779	0.2865361	0.0075588	0.5616107	0.0148152	0.0032101	4.30E-07	0.0180391	0.0003363	29.21666	0.0955063	21.76849	0.1054206	74.49374	0.2726265	20.06425	1.001074	0.2161893	0.0002529	0.0073995	0.0000215	0.0001335	2.43E-06	0.0021202	0.0000552	0.0001852	1.66E-06	0.0461832	0.0000248	0.0015545	0.0000424
21996-01I	10-MON-04	Monduli	60b	12/02/2013	matrix	45	2.459352	0.0116953	0.0121529	0.000063	8.47E-08	1.005980	3.36E-15	1.01E-13	0.0283971	0.0002403	0.6778726	0.7080387	0.0098188	1.387756	0.0192449	0.0032905	5.61E-07	0.0186871	0.0002768	30.0538	0.0877058	21.64181	0.1029868	71.97567	0.2783679	20.08138	1.001074	0.2375915	0.0003033	0.0079055	0.0000196	0.0001477	2.13E-06	0.0055974	0.0000759	0.0002245	1.81E-06	0.0503145	0.0000262	0.001682	0.0000417
21996-01J	10-MON-04	Monduli	60b	20/02/2013	matrix	35	2.426775	0.0203235	0.0205832	0.000063	8.47E-08	1.000000	5.35E-15	1.71E-13	0.0366527	0.0002358	2.31552	3.120556	0.0252279	6.11629	0.0494467	0.0058638	1.61E-06	0.021041	0.0003475	31.99971	0.1416306	21.35495	0.1789615	66.58823	0.3080173	23.79695	1.001135	0.4031798	0.0008104	0.0125995	0.000041	0.0002651	4.22E-06	0.0393174	0.0002863	0.0004618	2.53E-06	0.0859618	0.0001404	0.0027791	0.000031
21990-01A	10-MON-07	Monduli	60b	18/01/2013	matrix	3	-5.006501	1.287095	1.287125	0.0000631	1.11E-07	0.9960312	2.50E-16	1.34E-13	1.936808	0.0508493	0.0094468	0.6730037	0.0543949	1.319087	0.106614	-0.0354464	3.09E-06	0.3669745	0.0105966	534.4287	17.44517	-43.88858	11.26744	-8.208326	2.015511	12.34589	1.0009	0.3150289	0.0063037	0.0005895	0.0000155	0.0002163	2.72E-06	0.0003967	0.0000305	0.0011417	4.18E-06	0.0797748	0.000033	0.0002794	0.0000635
21990-01B	10-MON-07	Monduli	60b	20/01/2013	matrix	4	-0.1807232	0.4630118	0.4630119	0.0000631	1.11E-07	0.9970942	2.14E-16	1.81E-13	2.843005	0.0823951	0.0076737	0.8024069	0.0673152	1.572718	0.1319379	0.0243761	3.83E-06	0.5593218	0.0173901	847.2997	24.43563	-1.586396	4.064136	-0.187123	0.3139857	12.83852	1.000914	0.4268284	0.0002846	0.0005038	0.0000146	0.0002818	3.30E-06	0.0004042	0.0000319	0.0014322	4.39E-06	0.0972565	0.0000404	0.0001203	0.000058
21990-01C	10-MON-07	Monduli	60b	20/01/2013	matrix	5	1.209403	0.3785637	0.3785697	0.0000631	1.11E-07	0.9971170	2.74E-16	1.89E-13	2.277974	0.0563839	0.0092803	0.7775479	0.0509776	1.523994	0.099916	-0.0135364	2.90E-06	0.4391763	0.0117403	690.7778	16.97743	10.62029	3.325445	1.536591	0.3192788	12.84932	1.000914	0.4460982	0.0003433	0.0006458	0.000016	0.0002836	3.01E-06	0.0005021	0.0000306	0.0014711	4.63E-06	0.1005425	0.0000404	0.0001049	0.000058
21990-01D	10-MON-07	Monduli	60b	20/01/2013	matrix	6	1.740839	0.217909	0.2179306	0.0000631	1.11E-07	0.9971397	4.44E-16	1.75E-13	1.268559	0.0175854	0.0157382	0.7343328	0.0349424	1.439292	0.0684872	-0.0135231	1.99E-06	0.2478988	0.0048402	394.0269	5.315484	15.28931	1.914758	3.878252	0.3302598	12.86007	1.000914	0.4124068	0.000272	0.0010466	0.0000142	0.0002595	3.69E-06	0.0007686	0.0000352	0.0013277	4.47E-06	0.0927541	0.0000404	0.0000857	0.0000608
21990-01E	10-MON-07	Monduli	60b	20/01/2013	matrix	8	2.002729	0.127623	0.1276716	0.0000631	1.11E-07	0.9971626	8.76E-16	2.27E-13	0.809584	0.0062278	0.0214808	0.6396891	0.0197703	1.253791	0.0387499	0.0008166	1.13E-06	0.1658716	0.0020733	259.2813	1.904792	17.59069	1.121581	6.781338	0.255561	12.87092	1.000915	0.5348907	0.0004618	0.002063	0.0000151	0.0003422	3.49E-06	0.0013197	0.0000398	0.0016702	4.31E-06	0.1204545	0.0000461	0.0003028	0.0000594
21990-01F	10-MON-07	Monduli	60b	20/01/2013	matrix	10	2.222973	0.0847444	0.0848346	0.0000631	1.11E-07	0.9972076	1.57E-15	2.87E-13	0.547817	0.0026323	0.0275163	0.5545189	0.012062	1.086857	0.0236415	-0.0029527	6.88E-07	0.1149705	0.0010146	183.058	0.7909756	19.52637	0.7448446	10.6626	0.223215	12.89223	1.000915	0.6760516	0.0004709	0.0036931	0.0000155	0.0004246	3.30E-06	0.0020479	0.0000438	0.0020231	4.80E-06	0.1522411	0.0000513	0.0006779	0.000058
21990-01G	10-MON-07	Monduli	60b	20/01/2013	matrix	12	2.287507	0.0490514	0.0492163	0.0000631	1.11E-07	0.9972303	2.64E-15	2.91E-13	0.3019814	0.0014102	0.046492	0.5164979	0.0076494	1.012336	0.0149929	0.0003341	4.38E-07	0.0695197	0.0006824	110.2196	0.4597694	20.09359	0.4311433	18.22392	0.2164701	12.90304	1.000916	0.6860176	0.0005899	0.0062241	0.000025	0.0004327	3.88E-06	0.0032147	0.000046	0.0018796	4.56E-06	0.1539112	0.000048	0.0013251	0.0000573
21990-01H	10-MON-07	Monduli	60b	20/01/2013	matrix	14	2.364911	0.0287027	0.0290028	0.0000631	1.11E-07	0.9972534	3.84E-15	2.61E-13	0.1580385	0.0006718	0.0872135	0.5070629	0.0058824	0.9938433	0.0115296	-0.0000729	3.38E-07	0.0421025	0.0004069	67.91787	0.2204604	20.77395	0.2522968	30.57617	0.220167	12.91399	1.000916	0.6137077	0.0004534	0.009036	0.0000276	0.0003804	3.49E-06	0.0045818	0.0000514	0.001428	4.24E-06	0.137525	0.0000403	0.0019723	0.0000559
21990-01I	10-MON-07	Monduli	60b	21/01/2013	matrix	17	2.356157	0.02374	0.0240993	0.0000631	1.11E-07	0.9973027	4.72E-15	2.54E-13	0.1111821	0.0005328	0.161201	0.6592533	0.0063332	1.292137	0.012413	-0.0004794	3.66E-07	0.0330769	0.0003151	53.83457	0.190913	20.69701	0.2086734	38.42806	0.2571314	12.93746	1.000917	0.598194	0.0007511	0.0111117	0.0000357	0.0003675	3.30E-06	0.0073254	0.0000665	0.0012354	4.40E-06	0.1349198	0.000044	0.0023546	0.0000587
21990-01J	10-MON-07	Monduli	60b	21/01/2013	matrix	20	2.325549	0.0198676	0.0202848	0.0000631	1.11E-07	0.9973261	4.35E-15	2.00E-13	0.0857173	0.0004464	0.3060822	0.96491	0.0083352	1.891224	0.0163369	0.0019291	4.84E-07	0.0290694	0.000343	45.93235	0.154319	20.42797	0.1746327	44.44421	0.2517603	12.94861	1.000917	0.470625	0.000419	0.010246	0.000032	0.0002978	3.40E-06	0.0098865	0.0000798	0.0008783	3.66E-06	0.1064541	0.0000369	0.0022474	0.0000472
21990-01K	10-MON-07	Monduli	60b	21/01/2013	matrix	25	2.358388	0.0193229	0.0197635	0.0000631	1.11E-07	0.9973496	3.15E-15	1.18E-13	0.0560294	0.00047	0.5330871	1.098441	0.0097956	2.152945	0.0191994	0.0039685	5.69E-07	0.0241414	0.0003575	37.3429	0.1013895	20.71662	0.1698475	55.43445	0.3785553	12.95982	1.000917	0.2769882	0.0002801	0.0074174	0.0000175	0.0001791	2.63E-06	0.0081476	0.0000702	0.0004156	3.35E-06	0.0628729	0.0000313	0.0016327	0.0000488
21990-01L	10-MON-07	Monduli	60b	21/01/2013	matrix	35	2.344228	0.047994	0.048171	0.0000631	1.11E-07	0.9973731	9.67E-16	3.07E-14	0.0378937	0.001299	1.326365	1.848157	0.0265613	3.622388	0.0520602	0.0034119	1.52E-06	0.0204823	0.0006824	31.73114	0.2331099	20.59215	0.4218628	64.81186	1.260512	12.97102	1.000918	0.072236	0.0002354	0.0022765	0.000015	0.0000466	1.53E-06	0.0042073	0.000054	0.0000863	2.90E-06	0.0162737	0.0000309	0.000499	0.0000477
21992-01A	10-MON-10	Monduli	60b	21/01/2013	wr	3	0.6992824	0.5202265	0.5202286	0.0000631	1.35E-07	0.9975148	2.76E-16	2.65E-13	3.193353	0.0766647	0.0146135	1.71599	0.0711196	3.363341	0.1393944	0.0333389	4.05E-06	0.6287663	0.0164582	959.5694	22.95577	6.1484	4.574948	0.6399647	0.24832	13.03887	1.000919	0.623941	0.0004997	0.0006502	0.0000156	0.0004088	4.38E-06	0.0011158	0.0000379	0.0020764	4.92E-06	0.1400854	0.0000496	0.0001023	0.0000524
21992-01B	10-MON-10	Monduli	60b	21/01/2013	wr	5	1.998315	0.1520891	0.1521496	0.0000631	1.35E-07	0.9975383	9.67E-16	2.81E-13	0.9134301	0.0065743	0.0417689	1.403013	0.0243445	2.749906	0.0477152	-0.0017731	1.39E-06	0.1846264	0.0020516	290.205	2.005503	17.5764	1.338457	6.05052	0.2354804	13.05011	1.00092	0.6609317	0.0005179	0.0022775	0.0000156	0.0004205	3.69E-06	0.0031953	0.0000511	0.0020803	4.92E-06	0.1484915	0.0000472	0.0005796	0.0000509
21992-01C	10-MON-10	Monduli	60b	21/01/2013	wr	6	2.418587	0.0565262	0.056764	0.0000631	1.35E-07	0.9975618	1.77E-15	1.87E-13	0.2824349	0.0015369	0.1052814	1.093535	0.013523	2.143329	0.026505	0.002667	7.79E-07	0.0665966	0.0006655	105.5087	0.447054	21.27542	0.4975739	20.14908	0.3000642	13.06144	1.00092	0.4402786	0.0003317	0.0041729	0.000017	0.0002779	2.54E-06	0.0045632	0.0000534	0.0011786	4.28E-06	0.0983366	0.0000418	0.0008383	0.0000539
21992-01D	10-MON-10	Monduli	60b	21/01/2013	wr	8	2.413402	0.0202835	0.0209341	0.0000631	1.35E-07	0.9975854	4.27E-15	1.91E-13	0.0787863	0.0004141	0.2997617	0.8686078	0.0084429	1.702471	0.0165481	0.0007646	4.90E-07	0.0273584	0.000342	44.67323	0.1120891	21.22978	0.1785456	47.49379	0.2809993	13.07276	1.00092	0.4495076	0.0004823	0.0100621	0.0000204	0.0002753	3.40E-06	0.00874	0.0000832	0.0007928	3.84E-06	0.1009581	0.0000425	0.0022037	0.0000524
21992-01E	10-MON-10	Monduli	60b	21/01/2013	wr	10	2.406965	0.0136913	0.014633	0.0000631	1.35E-07	0.9976312	5.93E-15	1.93E-13	0.0384829	0.0002686	0.5403059	0.7647638	0.0059964	1.498937	0.0117529	0.0007727	3.53E-07	0.0197279	0.0002344	32.59161	0.0919117	21.17312	0.1205172	64.93103	0.2582647	13.09483	1.000921	0.4552858	0.0004475	0.0139694	0.000034	0.0002756	3.21E-06	0.0106833	0.0000797	0.0005376	3.51E-06	0.1022491	0.0000396	0.0033999	0.0000574
21992-01F	10-MON-10	Monduli	60b	21/01/2013	wr	12	2.384112	0.0106061	0.0117754	0.0000631	1.35E-07	0.9976543	6.28E-15	1.53E-13	0.0115069	0.000205	1.783656	0.7549011	0.0054361	1.479606	0.0106547	0.0021096	3.22E-07	0.0150774	0.0002075	24.33619	0.0731205	20.97196	0.0933585	86.13228	0.2849293	13.106	1.000921	0.3596718	0.00038	0.0147793	0.0000386	0.0002228	3.02E-06	0.0111569	0.0000749	0.0001701	3.00E-06	0.0804764	0.0000375	0.0034514	0.0000502
21992-01G	10-MON-10	Monduli	60b	21/01/2013	wr	14	2.394599	0.0119275	0.0129871	0.0000631	1.35E-07	0.9976778	4.93E-15	1.16E-13	0.0087919	0.0002599	2.68914	0.8695503	0.0068706	1.704319	0.0134663	0.002101	4.05E-07	0.0145552	0.0001982	23.60671	0.0730032	21.06427	0.1049905	89.1775	0.3580066	13.1173	1.000922	0.2738849	0.0002976	0.011602	0.0000313	0.0001689	2.26E-06	0.0100885	0.000075	0.000102	3.00E-06	0.0606632	0.000035	0.0026726	0.0000587
21992-01H	10-MON-10	Monduli	60b	21/01/2013	wr	17	2.390443	0.0188842	0.0195684	0.0000631	1.35E-07	0.9977505	2.91E-15	7.46E-14	0.0159366	0.0003425	2.352071	1.378417	0.011792	2.701697	0.0231124	0.0037673	6.93E-07	0.0164631	0.0003197	25.65467	0.1286368	21.02769	0.1662258	81.8863	0.7157269	13.15247	1.000923	0.1756473	0.0008131	0.0068466	0.0000115	0.0001127	2.19E-06	0.0094375	0.0000792	0.0001091	2.34E-06	0.03912	0.000028	0.0014431	0.0000467
21992-01I	10-MON-10	Monduli	60b	21/01/2013	wr	20	2.379395	0.0316873	0.032096	0.0000631	1.35E-07	0.9977738	1.76E-15	4.94E-14	0.0244385	0.0005885	2.061636	1.852662	0.020012	3.631217	0.0392236	0.0053747	1.16E-06	0.0186092	0.0003748	28.05072	0.2282846	20.93044	0.2789221	74.52	1.046488	13.16377	1.000923	0.1163725	0.0007938	0.0041486	0.0000183	0.0000772	1.52E-06	0.007686	0.0000759	0.0001014	2.40E-06	0.0259552	0.0000259	0.0009311	0.0000422
21992-01J	10-MON-10	Monduli	60b	21/01/2013	wr	25	2.386961	0.059334	0.0595547	0.0000631	1.35E-07	0.9977969	8.63E-16	3.05E-14	0.0489004	0.001137	1.724331	3.100352	0.0362358	6.076689	0.0710222	-0.0001461	2.10E-06	0.0212903	0.0006597	35.30182	0.405652	20.99703	0.5222804	59.34869	1.572237	13.17494	1.000923	0.0717454	0.0007787	0.0020323	7.90E-06	0.0000433	1.34E-06	0.006301	0.0000696	0.0000994	2.28E-06	0.0159489	0.0000255	0.0003337	0.0000474
21992-01K	10-MON-10	Monduli	60b	21/01/2013	wr	35	2.404724	0.1880206	0.1880914	0.0000631	1.35E-07	0.9978199	2.60E-16	1.18E-14	0.0828718	0.0036423	1.379884	4.204502	0.0932694	8.240824	0.1828081	0.0126224	5.33E-06	0.032086	0.0018758	45.49574	1.289065	21.1534	1.655045	46.35706	3.812835	13.18609	1.000923	0.0278992	0.0007651	0.0006132	4.87E-06	0.0000197	1.14E-06	0.0025783	0.0000535	0.0000508	2.20E-06	0.0062628	0.0000269	0.0000504	0.0000428
21993-01A	10-MON-11	Monduli	60b	08/02/2013	matrix	3	5.719875	6.65745	6.657463	0.0000629	1.46E-07	1.001999	9.48E-18	4.55E-14	15.89125	6.65974	0.0026108	1.525679	1.309073	2.990331	2.565784	-0.2811662	0.0000744	2.926573	1.229794	4795.576	2009.544	50.46737	58.8329	1.051232	0.9705338	18.66767	1.001048	0.1070993	0.0005782	0.0000223	9.30E-06	0.0000654	2.07E-06	0.0000341	0.0000255	0.0003549	2.88E-06	0.0226101	0.0000326	-0.0001231	0.000036
21993-01B	10-MON-11	Monduli	60b	08/02/2013	matrix	5	18.73261	3.85775	3.857993	0.0000629	1.46E-07	1.002017	6.15E-17	1.81E-13	9.29274	1.116185	0.0033511	1.14522	0.2496894	2.244631	0.4893911	0.3994934	0.0000142	1.910882	0.2309899	2940.556	352.6931	165.8786	34.33831	5.636472	0.7567019	18.67977	1.001048	0.4257978	0.0013219	0.0001448	0.0000173	0.0002767	4.24E-06	0.0001658	0.0000301	0.0013456	9.82E-06	0.0927422	0.0004702	-0.0000522	0.000022
21993-01C	10-MON-11	Monduli	60b	08/02/2013	matrix	7	7.195664	2.359368	2.359427	0.0000629	1.46E-07	1.002034	1.16E-16	1.75E-13	4.842167	0.2401225	0.0114903	2.045836	0.1862294	4.009839	0.3650096	0.4146703	0.0000106	1.072696	0.0557519	1509.176	73.37415	63.51447	20.86716	4.202434	1.238729	18.69084	1.001048	0.4127516	0.0023656	0.0002735	0.0000131	0.0002934	5.63E-06	0.0005595	0.0000431	0.0013243	0.0000151	0.0945482	0.0009601	0.0001056	0.000025
21993-01D	10-MON-11	Monduli	60b	08/02/2013	matrix	9	3.597345	0.4535766	0.4536537	0.0000629	1.46E-07	1.002052	5.05E-16	1.45E-13	0.857193	0.0161743	0.0358911	1.131421	0.0537433	2.217584	0.1053369	0.1011181	3.06E-06	0.2094603	0.0046534	287.571	4.670156	31.72128	4.003613	11.02192	1.27492	18.70245	1.001049	0.3416715	0.0023654	0.0011881	0.0000172	0.0002489	4.14E-06	0.0013443	0.0000606	0.0010185	0.0000122	0.0763422	0.0008301	0.000231	0.000026
21993-01E	10-MON-11	Monduli	60b	08/02/2013	matrix	12	2.731616	0.0932922	0.093508	0.0000629	1.46E-07	1.002094	1.80E-15	1.43E-13	0.1865626	0.0022977	0.1535941	1.053821	0.0263146	2.065489	0.0515767	0.0158407	1.50E-06	0.0529731	0.0009391	79.68806	0.6123521	24.08152	0.8230729	30.19737	0.9304618	18.73009	1.001049	0.337117	0.0016918	0.0042305	0.0000236	0.0002241	3.74E-06	0.0044581	0.0001082	0.0007892	8.65E-06	0.0723963	0.0006301	0.0007507	0.00003
21993-01F	10-MON-11	Monduli	60b	08/02/2013	matrix	17	2.371871	0.0307905	0.0312803	0.0000629	1.46E-07	1.002113	5.03E-15	1.39E-13	0.0229321	0.0003327	1.202374	1.014042	0.0155689	1.987523	0.0305151	0.0081333	8.99E-07	0.019309	0.0003642	27.65902	0.2746299	20.90798	0.2715961	75.53933	1.001402	18.74258	1.001049	0.32738	0.0024619	0.0118363	0.0000736	0.0002285	4.04E-06	0.0120025	0.0001677	0.0002714	3.55E-06	0.0785123	0.0005101	0.002905	0.000032
21993-01G	10-MON-11	Monduli	60b	08/02/2013	matrix	25	2.391688	0.0142844	0.0153283	0.0000629	1.46E-07	1.002130	8.46E-15	2.00E-13	0.0089776	0.0001415	2.297204	0.7585421	0.0075164	1.486743	0.0147321	0.0041201	4.43E-07	0.0152912	0.0002666	23.69133	0.12344	21.08278	0.1260012	88.94411	0.4374231	18.75421	1.00105	0.4718954	0.0014106	0.0199185	0.0000795	0.0003046	5.13E-06	0.015109	0.0001362	0.0001788	2.72E-06	0.1068573	0.0003402	0.0044382	0.000028
21993-01H	10-MON-11	Monduli	60b	10/02/2013	matrix	35	2.365201	0.0198538	0.020601	0.0000629	1.46E-07	0.008913	3.81E-15	9.79E-14	0.0163618	0.0002772	1.209722	0.7280254	0.0094958	1.42693	0.0186117	0.0026358	5.44E-07	0.0161799	0.0002755	25.66576	0.18495	20.84914	0.1751247	81.19349	0.4418074	19.21896	1.001058	0.230519	0.0005825	0.0089816	0.0000595	0.0001453	2.26E-06	0.0065388	0.000073	0.000147	2.29E-06	0.051082	0.0000272	0.0019014	0.0000302
21993-01I	10-MON-11	Monduli	60b	10/02/2013	matrix	45	2.35913	0.0216187	0.0223035	0.0000629	1.46E-07	1.003209	2.25E-15	7.45E-14	0.0414151	0.0004855	0.8057416	1.227164	0.0192832	2.405241	0.0377951	0.0026512	1.10E-06	0.0209125	0.0005055	33.04546	0.1338711	20.79559	0.1906925	62.8767	0.5593867	19.48073	1.001063	0.17545	0.0005295	0.0053094	0.0000133	0.000111	2.65E-06	0.0065154	0.0001007	0.0002199	2.52E-06	0.0380915	0.0000256	0.0008929	0.0000513
21993-01J	10-MON-11	Monduli	60b	20/02/2013	matrix	35	2.358022	0.0643551	0.0645882	0.0000629	1.46E-07	1.004506	1.38E-15	1.22E-13	0.2267875	0.001095	0.627061	5.228624	0.0567733	10.2481	0.1112757	0.0101294	3.37E-06	0.0584567	0.0009288	88.00561	0.302411	20.78582	0.5676573	23.53113	0.3034514	23.75037	1.001134	0.2868999	0.0002024	0.00326	9.31E-06	0.0001906	2.93E-06	0.0170454	0.000177	0.0007393	2.83E-06	0.0617215	0.000022	0.0007025	0.000024
22033-01A	MR103	Monduli	60E	18/03/2013	plag	3	6.323582	0.7903801	0.7905373	0.0000624	1.56E-07	1.004028	4.80E-17	2.19E-14	1.34383	0.0429707	0.1674982	8.275666	0.7361734	16.2203	1.4429	-0.0009647	0.0000418	0.2661868	0.0142568	456.5657	13.81621	56.28726	7.047643	12.25588	1.48064	39.50999	1.001317	0.0516492	0.0004442	0.0001131	3.24E-06	0.0000301	1.35E-06	0.0009362	0.0000784	0.000152	2.06E-06	0.0113702	0.0000513	0.0516492	0.0004442
22033-01B	MR103	Monduli	60E	18/03/2013	plag	5	2.428376	0.2602044	0.260275	0.0000624	1.56E-07	1.004069	1.23E-16	9.47E-15	0.1897287	0.0069887	1.687197	11.76907	0.4565228	23.06737	0.8947847	-0.001995	0.000026	0.0469876	0.0034839	77.11106	1.986031	21.59205	2.315181	27.76718	2.963645	39.59185	1.001317	0.0222929	0.0003874	0.0002891	5.35E-06	0.0000136	9.67E-07	0.0034024	0.0001151	0.0000549	1.74E-06	0.00515	0.0000234	0.0222929	0.0003874
22033-01C	MR103	Monduli	60E	18/03/2013	plag	7	2.404438	0.2210727	0.2211541	0.0000624	1.56E-07	1.004083	1.39E-16	6.11E-15	0.0793303	0.00519	4.484645	13.08004	0.3556128	25.63688	0.6970011	0.0111209	0.0000202	0.0305366	0.00308	43.80739	1.261686	21.37906	1.966978	48.34932	4.601435	39.61853	1.001318	0.0143836	0.0003821	0.0003283	3.24E-06	0.00001	9.98E-07	0.0042947	0.0001081	0.000026	1.68E-06	0.0033048	0.0000216	0.0143836	0.0003821
22033-01D	MR103	Monduli	60E	18/03/2013	plag	9	2.317118	0.253715	0.2537808	0.0000624	1.56E-07	1.004095	1.20E-16	4.88E-15	0.0713908	0.005874	4.894342	12.84631	0.4152218	25.17878	0.8138347	0.0029491	0.0000236	0.0262237	0.0031249	40.6893	1.472109	20.60216	2.257301	50.17126	5.71381	39.64416	1.001318	0.0114811	0.0003851	0.0002822	3.37E-06	7.40E-06	8.70E-07	0.0036248	0.0001082	0.0000201	1.64E-06	0.0028391	0.0000284	0.0114811	0.0003851
22033-01E	MR103	Monduli	60E	18/03/2013	plag	12	2.491367	0.213305	0.2133956	0.0000624	1.56E-07	1.004108	1.43E-16	6.27E-15	0.0766098	0.0049535	4.480367	12.61944	0.4078319	24.73411	0.7993505	0.0035825	0.0000232	0.0274403	0.0029074	43.80596	1.245777	22.15252	1.897957	50.11673	4.454478	39.66965	1.001318	0.0147632	0.0003847	0.000337	3.44E-06	9.25E-06	9.67E-07	0.0042529	0.0001297	0.0000258	1.65E-06	0.0033755	0.0000228	0.0147632	0.0003847
22033-01F	MR103	Monduli	60E	18/03/2013	plag	15	2.210115	0.2018813	0.2019567	0.0000624	1.56E-07	1.004134	1.53E-16	7.30E-15	0.0982174	0.0048328	3.940954	14.23085	0.421789	27.89247	0.8267065	-0.0003007	0.000024	0.0301305	0.0024962	47.62492	1.307487	19.65018	1.796031	40.84341	3.787292	39.72123	1.001319	0.0171829	0.0003854	0.0003608	5.44E-06	0.0000109	8.78E-07	0.0051344	0.0001299	0.0000354	1.66E-06	0.003776	0.0000189	0.0171829	0.0003854
22033-01G	MR103	Monduli	60E	18/03/2013	plag	17	2.419732	0.2129359	0.2130215	0.0000624	1.56E-07	1.004148	1.52E-16	8.61E-15	0.1231607	0.0053121	3.477207	15.74501	0.480013	30.86023	0.9408255	0.0004252	0.0000273	0.035046	0.0027691	56.7732	1.434685	21.51514	1.894597	37.47287	3.314453	39.74807	1.001319	0.0202794	0.0003869	0.0003572	5.71E-06	0.0000125	9.60E-07	0.0056241	0.0001447	0.000044	1.76E-06	0.0045556	0.0000206	0.0202794	0.0003869
22033-01H	MR103	Monduli	60E	18/03/2013	plag	21	2.394273	0.0986226	0.0988034	0.0000624	1.56E-07	1.004160	3.26E-16	1.27E-14	0.0647208	0.002307	6.776764	16.12523	0.3181178	31.60546	0.6235109	0.0046196	0.0000181	0.0254026	0.0014612	39.06181	0.6346539	21.28862	0.8774824	53.87594	2.263911	39.77396	1.001319	0.0299738	0.0003886	0.0007673	7.18E-06	0.0000195	1.10E-06	0.0123736	0.0002132	0.0000497	1.71E-06	0.0067243	0.0000194	0.0299738	0.0003886
22033-01I	MR103	Monduli	60E	18/03/2013	plag	25	2.370932	0.2044918	0.2045773	0.0000624	1.56E-07	1.004201	1.50E-16	4.91E-15	0.0440904	0.0047192	9.898622	16.0457	0.4131844	31.44957	0.8098413	-0.0061436	0.0000235	0.0177849	0.0024927	32.70374	1.151545	21.08094	1.819417	63.72632	5.854405	39.85517	1.00132	0.0115686	0.0003838	0.0003537	3.51E-06	6.29E-06	8.72E-07	0.005676	0.000134	0.0000156	1.66E-06	0.002432	0.0000208	0.0115686	0.0003838
22033-01J	MR103	Monduli	60E	19/03/2013	plag	30	2.514584	0.3909874	0.3910377	0.0000624	1.56E-07	1.004214	7.68E-17	2.43E-15	0.0367629	0.0088667	13.16316	17.79135	0.7181501	34.87104	1.407574	0.0096879	0.0000408	0.0217846	0.0045032	31.60971	2.231735	22.35911	3.478994	69.8417	11.76709	39.88197	1.00132	0.005716	0.0003839	0.0001808	3.19E-06	3.94E-06	8.04E-07	0.0032172	0.0001159	6.65E-06	1.60E-06	0.001123	0.0000202	0.005716	0.0003839
22033-01K	MR103	Monduli	60E	19/03/2013	plag	35	2.439819	0.5216045	0.52164	0.0000624	1.56E-07	1.004227	5.75E-17	1.83E-15	0.0394251	0.0118222	11.66856	16.91333	0.8027129	33.15013	1.573317	-0.0081722	0.0000456	0.0161661	0.0060025	31.83269	2.983792	21.69386	4.641029	67.33158	15.53529	39.90783	1.00132	0.0043122	0.0003857	0.0001355	3.03E-06	2.19E-06	8.05E-07	0.0022912	0.0000952	5.34E-06	1.60E-06	0.0007791	0.0000202	0.0043122	0.0003857
22034-01A	MR104	Monduli	60E	11/03/2013	matrix	3	4.091648	0.2649176	0.2651447	0.0000625	1.68E-07	1.002487	2.33E-16	7.77E-14	0.9976324	0.0097482	0.0858551	3.149297	0.1489299	6.172622	0.2919026	0.0301735	8.47E-06	0.2115279	0.0044135	333.9004	2.841498	36.33384	2.355137	10.8573	0.679513	34.31401	1.001266	0.1830106	0.0007089	0.0005481	4.10E-06	0.0001159	2.24E-06	0.0017261	0.0000804	0.0005468	3.40E-06	0.0410756	0.0000677	0.1830106	0.0007089
22034-01B	MR104	Monduli	60E	11/03/2013	matrix	5	2.635607	0.0603386	0.0607515	0.0000625	1.68E-07	1.002487	8.91E-16	6.35E-14	0.1611824	0.0014596	0.3935493	2.332436	0.0627886	4.571574	0.1230657	0.0098154	3.57E-06	0.0460339	0.0010403	71.29792	0.3961957	23.39475	0.5359821	32.75858	0.7447725	34.33537	1.001266	0.1495836	0.0006714	0.002098	6.62E-06	0.0000966	2.15E-06	0.0048935	0.0001305	0.0003382	2.87E-06	0.0336099	0.0000537	0.1495836	0.0006714
22034-01C	MR104	Monduli	60E	11/03/2013	matrix	7	2.415459	0.0409086	0.0414187	0.0000625	1.68E-07	1.002487	1.11E-15	4.57E-14	0.0672224	0.0009677	0.6936588	1.714649	0.043058	3.360713	0.0843937	0.0069511	2.45E-06	0.0272659	0.0006573	41.34794	0.2404412	21.43932	0.3633428	51.78867	0.8995352	34.38009	1.001267	0.1076798	0.0005507	0.0026042	6.80E-06	0.000071	1.69E-06	0.0044654	0.0001112	0.0001751	2.48E-06	0.0241097	0.0000308	0.1076798	0.0005507
22034-01D	MR104	Monduli	60E	11/03/2013	matrix	9	2.42819	0.0460976	0.0465556	0.0000625	1.68E-07	1.002487	9.46E-16	3.44E-14	0.0501512	0.0010711	0.8052909	1.485121	0.0404304	2.910837	0.0792436	0.0023315	2.30E-06	0.0224473	0.0006873	36.38538	0.2688275	21.55239	0.4094335	59.17226	1.177198	34.40245	1.001267	0.0810788	0.000548	0.0022283	6.17E-06	0.00005	1.52E-06	0.0033093	0.0000894	0.0001118	2.37E-06	0.0184013	0.0000287	0.0810788	0.000548
22034-01E	MR104	Monduli	60E	11/03/2013	matrix	12	2.40402	0.0454405	0.045896	0.0000625	1.68E-07	1.002487	9.88E-16	3.58E-14	0.0503628	0.001062	0.7427099	1.375512	0.0483418	2.696004	0.0947498	0.0019892	2.75E-06	0.0223738	0.0006625	36.24468	0.2877296	21.33772	0.403592	58.81488	1.140735	34.42472	1.001267	0.084363	0.0005451	0.0023276	0.0000104	0.0000521	1.52E-06	0.0032016	0.0001113	0.0001172	2.42E-06	0.0190969	0.0000302	0.084363	0.0005451
22034-01F	MR104	Monduli	60E	11/03/2013	matrix	15	2.381021	0.0261572	0.0269259	0.0000625	1.68E-07	1.002487	1.82E-15	6.07E-14	0.042357	0.0006043	2.40293	3.74228	0.0484293	7.334868	0.0949214	0.0036306	2.76E-06	0.0213266	0.0004663	33.42222	0.175997	21.13344	0.2323189	63.0648	0.6901095	34.65945	1.00127	0.142922	0.0005404	0.0042763	0.0000153	0.0000912	1.96E-06	0.0160029	0.0001984	0.0001811	2.50E-06	0.0322121	0.0000205	0.142922	0.0005404
22034-01G	MR104	Monduli	60E	11/03/2013	matrix	17	2.355655	0.0327662	0.0333702	0.0000625	1.68E-07	1.002487	1.33E-15	4.36E-14	0.0413532	0.0007499	3.776677	5.742158	0.0681286	11.25463	0.1335321	0.0023233	3.88E-06	0.0206043	0.000514	32.70561	0.1933871	20.90815	0.291014	63.66871	0.9317038	34.68212	1.00127	0.102562	0.0005474	0.0031359	7.43E-06	0.0000646	1.60E-06	0.0180069	0.0002087	0.0001297	2.33E-06	0.0231347	0.0000219	0.102562	0.0005474
22034-01H	MR104	Monduli	60E	11/03/2013	matrix	19	2.345328	0.035271	0.0358279	0.0000625	1.68E-07	1.002487	1.26E-15	4.11E-14	0.0421759	0.0008135	4.713038	7.308297	0.0779445	14.32426	0.1527712	0.0035359	4.45E-06	0.0211148	0.0005453	32.70955	0.2069704	20.81643	0.3132587	63.3109	0.9984369	34.7047	1.00127	0.0967426	0.0005469	0.0029576	7.89E-06	0.0000624	1.60E-06	0.0216152	0.0002225	0.0001247	2.38E-06	0.0217771	0.0000212	0.0967426	0.0005469
22034-01I	MR104	Monduli	60E	11/03/2013	matrix	21	2.399521	0.0553016	0.055675	0.0000625	1.68E-07	1.002487	7.60E-16	2.49E-14	0.0413016	0.0012543	5.744759	8.723413	0.1055802	17.09789	0.2069372	0.003915	6.02E-06	0.0210223	0.0008989	32.79094	0.3234313	21.29776	0.4911741	64.54868	1.587519	34.72727	1.00127	0.0586546	0.000542	0.0017887	5.61E-06	0.0000376	1.60E-06	0.015604	0.0001818	0.0000739	2.23E-06	0.0131971	0.0000205	0.0586546	0.000542
22034-01J	MR104	Monduli	60E	12/03/2013	matrix	25	2.352858	0.063195	0.0635095	0.0000625	1.68E-07	1.002487	6.72E-16	2.15E-14	0.0406749	0.0014196	7.105689	10.62619	0.1421594	20.82733	0.2786324	0.0008536	8.10E-06	0.0197706	0.0008086	32.00912	0.3967509	20.88331	0.5612675	64.75025	1.82492	34.77266	1.001271	0.0506513	0.0005385	0.0015824	9.70E-06	0.0000313	1.26E-06	0.0168149	0.000199	0.0000644	2.21E-06	0.0114914	0.0000213	0.0506513	0.0005385
22034-01K	MR104	Monduli	60E	12/03/2013	matrix	30	2.357329	0.0894692	0.0896925	0.0000625	1.68E-07	1.002487	4.77E-16	1.56E-14	0.043064	0.0019569	7.408694	11.73003	0.1722033	22.99085	0.3375184	0.0079367	9.81E-06	0.022621	0.0011383	32.65585	0.5689148	20.92303	0.7946237	63.53831	2.559231	34.79526	1.001271	0.0366951	0.0005696	0.0011237	8.46E-06	0.0000254	1.26E-06	0.0131809	0.0001653	0.0000484	2.17E-06	0.0086067	0.0000226	0.0366951	0.0005696
22034-01L	MR104	Monduli	60E	12/03/2013	matrix	35	2.382504	0.1023318	0.1025312	0.0000625	1.68E-07	1.002487	4.06E-16	1.38E-14	0.0471501	0.0022938	7.23597	12.5436	0.1923326	24.58546	0.376972	0.0043163	0.000011	0.0221138	0.001283	34.01944	0.6281834	21.14662	0.9088756	61.60729	2.795848	34.81798	1.001271	0.0325533	0.0005405	0.0009569	7.33E-06	0.0000212	1.21E-06	0.012003	0.0001586	0.0000451	2.17E-06	0.0074251	0.0000213	0.0325533	0.0005405
22045-01A	MR220	Monduli	60F	16/03/2013	matrix	3	1.687698	0.0870434	0.0872269	0.0000622	2.09E-07	1.003367	6.24E-16	5.48E-14	0.2436337	0.002545	0.0459258	0.4116946	0.049888	0.8069213	0.0977805	0.0130418	2.84E-06	0.062849	0.0012783	87.75153	0.5717407	15.03717	0.7759084	17.13121	0.8624067	38.2184	1.001305	0.1289787	0.0005174	0.0014698	7.37E-06	0.0000924	1.81E-06	0.0006051	0.000073	0.0003581	3.27E-06	0.0290951	0.0000718	0.1289787	0.0005174
22045-01B	MR220	Monduli	60F	16/03/2013	matrix	5	2.808091	0.0368488	0.0380303	0.0000622	2.09E-07	1.003380	1.79E-15	7.95E-14	0.0651251	0.0008942	0.1344431	0.3222297	0.0196905	0.6315703	0.0385933	0.0160631	1.12E-06	0.0300671	0.0006049	44.44333	0.4048767	25.02751	0.3286756	56.30129	0.5631669	38.24348	1.001305	0.1872495	0.0005106	0.0042132	0.0000361	0.0001267	2.28E-06	0.0013576	0.0000818	0.0002744	2.92E-06	0.0423095	0.0002006	0.1872495	0.0005106
22045-01C	MR220	Monduli	60F	16/03/2013	matrix	7	2.765257	0.0286081	0.0300702	0.0000622	2.09E-07	1.003393	2.76E-15	9.79E-14	0.0361751	0.000484	0.2296923	0.3058152	0.0133046	0.5993979	0.026077	0.0105968	7.56E-07	0.0226968	0.0003671	35.41823	0.2961139	24.64545	0.2551664	69.57033	0.5303503	38.2685	1.001305	0.2305389	0.0007706	0.006509	0.0000491	0.0001477	2.09E-06	0.0019906	0.000085	0.0002355	2.59E-06	0.0520895	0.0002306	0.2305389	0.0007706
22045-01D	MR220	Monduli	60F	16/03/2013	matrix	9	2.710027	0.0183261	0.0204511	0.0000622	2.09E-07	1.003419	4.09E-15	1.17E-13	0.0148381	0.0002414	0.4529939	0.2474491	0.0116765	0.4850002	0.022886	0.0085213	6.64E-07	0.0179402	0.0002568	28.56004	0.1680042	24.15284	0.1634523	84.55586	0.4129872	38.31846	1.001306	0.2750958	0.000702	0.0096322	0.0000501	0.0001728	2.28E-06	0.0023835	0.0001114	0.0001429	2.20E-06	0.0615658	0.0001907	0.2750958	0.000702
22045-01E	MR220	Monduli	60F	17/03/2013	matrix	12	2.601237	0.0153511	0.0176516	0.0000622	2.09E-07	1.003432	5.26E-15	1.35E-13	0.0084807	0.0001706	0.9104078	0.2841875	0.009118	0.5570074	0.0178713	0.0037799	5.19E-07	0.015099	0.0002129	25.68794	0.1368233	23.18256	0.1369098	90.23111	0.407225	38.34354	1.001306	0.3183569	0.0008409	0.0123932	0.0000561	0.0001871	2.48E-06	0.003522	0.0001115	0.0001051	2.06E-06	0.0718498	0.0002405	0.3183569	0.0008409
22045-01F	MR220	Monduli	60F	17/03/2013	matrix	15	2.448679	0.0162725	0.018223	0.0000622	2.09E-07	1.003445	4.50E-15	1.21E-13	0.0173353	0.0002321	1.645906	1.049313	0.0195311	2.056653	0.0382809	0.0040338	1.11E-06	0.0168334	0.0002421	26.89774	0.1516354	21.82202	0.1451148	81.07117	0.390065	38.36869	1.001306	0.2847253	0.0006768	0.0105855	0.0000531	0.0001782	2.38E-06	0.0111075	0.0001982	0.0001835	2.27E-06	0.0638188	0.000131	0.2847253	0.0006768
22045-01G	MR220	Monduli	60F	17/03/2013	matrix	17	2.44588	0.0142465	0.0164346	0.0000622	2.09E-07	1.003486	2.84E-15	7.82E-14	0.0199304	0.000313	2.316022	1.697362	0.0296668	3.326829	0.058147	0.0055241	1.69E-06	0.0178127	0.0003335	27.58504	0.0973337	21.79706	0.1270475	78.92436	0.4308353	38.44761	1.001307	0.184186	0.0003903	0.006677	0.0000182	0.0001189	2.19E-06	0.0113333	0.0001949	0.0001331	2.06E-06	0.0412884	0.0000248	0.184186	0.0003903
22045-01H	MR220	Monduli	60F	17/03/2013	matrix	21	2.467181	0.0129793	0.0153873	0.0000622	2.09E-07	1.003499	3.28E-15	9.23E-14	0.0213285	0.0002648	3.286563	2.577439	0.0353778	5.051781	0.0693404	0.0074486	2.02E-06	0.0187056	0.0003024	28.107	0.0981976	21.98701	0.1157483	78.08472	0.3632378	38.47255	1.001307	0.2172877	0.0004044	0.0077307	0.0000222	0.0001446	2.28E-06	0.0199255	0.0002664	0.0001649	1.99E-06	0.048214	0.0000354	0.2172877	0.0004044
22045-01I	MR220	Monduli	60F	17/03/2013	matrix	25	2.46645	0.0193646	0.0210535	0.0000622	2.09E-07	1.003512	1.97E-15	5.52E-14	0.0211823	0.0004223	3.595651	2.800487	0.0449802	5.488955	0.0881611	0.0018989	2.56E-06	0.0167551	0.0003767	28.03525	0.133105	21.9805	0.172691	78.24892	0.593868	38.4975	1.001307	0.1299348	0.0004009	0.0046347	0.0000162	0.0000777	1.71E-06	0.0129794	0.0002026	0.0000982	1.93E-06	0.0289031	0.0000214	0.1299348	0.0004009
22045-01J	MR220	Monduli	60F	17/03/2013	matrix	30	2.510237	0.0303728	0.0315154	0.0000622	2.09E-07	1.003525	1.16E-15	3.35E-14	0.0226242	0.0006673	3.268365	2.718862	0.055804	5.32897	0.1093759	0.0054347	3.18E-06	0.0182509	0.0004722	28.86345	0.2051244	22.37099	0.2708682	77.35837	0.9370822	38.52265	1.001308	0.078825	0.0003977	0.002731	0.0000133	0.0000498	1.26E-06	0.0074251	0.0001474	0.0000618	1.80E-06	0.017383	0.0000214	0.078825	0.0003977
22045-01K	MR220	Monduli	60F	17/03/2013	matrix	35	2.494513	0.0328171	0.0338642	0.0000622	2.09E-07	1.003551	9.84E-16	2.86E-14	0.0239071	0.0007636	3.518432	3.092809	0.0566894	6.061907	0.1111112	0.0047383	3.23E-06	0.0182387	0.0006254	29.0703	0.1881625	22.23077	0.2926636	76.30613	1.079144	38.57296	1.001308	0.067377	0.0003946	0.0023177	5.79E-06	0.0000423	1.44E-06	0.0071683	0.0001297	0.0000554	1.76E-06	0.0152776	0.0000227	0.067377	0.0003946
22046-01A	MR226	Monduli	60F	17/03/2013	matrix	3	7.503935	0.8544797	0.8548696	0.0000619	2.13E-07	1.003564	1.53E-16	2.81E-13	5.947341	0.1171903	0.0133962	2.92945	0.2136011	5.741721	0.4186581	0.1749814	0.0000121	1.199439	0.0255213	1842.882	35.81662	67.32396	7.682193	3.645582	0.3649773	38.59808	1.001308	0.6623243	0.0008581	0.0003594	6.89E-06	0.0004311	3.75E-06	0.0010528	0.0000737	0.0021375	7.55E-06	0.1507359	0.0002705	0.6623243	0.0008581
22046-01B	MR226	Monduli	60F	17/03/2013	matrix	5	2.761998	0.0549012	0.0557196	0.0000619	2.13E-07	1.003577	1.56E-15	2.02E-13	0.3510215	0.0016546	0.1803214	2.327415	0.0419354	4.561734	0.0821933	0.0057561	2.39E-06	0.0806089	0.0009756	129.3369	0.4192354	24.74759	0.4922932	19.10266	0.3396081	38.62321	1.001308	0.4748285	0.0006927	0.0036713	0.0000103	0.0002959	3.45E-06	0.0085445	0.0001515	0.0012887	4.84E-06	0.1064149	0.000141	0.4748285	0.0006927
22046-01C	MR226	Monduli	60F	17/03/2013	matrix	7	2.417927	0.0098139	0.0128727	0.0000619	2.13E-07	1.003666	4.64E-15	1.24E-13	0.01776	0.0001981	2.562692	1.673621	0.0197878	3.280297	0.038784	0.0014093	1.13E-06	0.0159835	0.000231	26.80498	0.0724022	21.66264	0.0879835	80.72169	0.2956378	38.79715	1.00131	0.2927699	0.0004534	0.0109222	0.0000232	0.0001746	2.48E-06	0.0182797	0.0002117	0.000194	2.12E-06	0.06615	0.0000248	0.2927699	0.0004534
22046-01D	MR226	Monduli	60F	17/03/2013	matrix	9	2.394937	0.0087927	0.0120579	0.0000619	2.13E-07	1.003680	4.68E-15	1.11E-13	0.0078457	0.0001753	4.443733	1.282106	0.0188033	2.512928	0.0368545	0.0007735	1.07E-06	0.0139014	0.0002107	23.67638	0.0617035	21.45653	0.0788272	90.5443	0.3035385	38.82427	1.00131	0.2607959	0.0004	0.011015	0.0000222	0.0001531	2.28E-06	0.0141224	0.0002043	0.0000864	1.92E-06	0.058924	0.0000226	0.2607959	0.000400
22046-01E	MR226	Monduli	60F	17/03/2013	matrix	12	2.394386	0.0108536	0.0136327	0.0000619	2.13E-07	1.003694	3.85E-15	9.31E-14	0.0096744	0.0002137	3.685261	1.311095	0.02539	2.569747	0.0497643	0.0022847	1.44E-06	0.0147679	0.0002355	24.21471	0.0779794	21.45159	0.0973035	88.50906	0.3733465	38.85056	1.001311	0.219238	0.0004326	0.0090539	0.0000222	0.0001337	2.09E-06	0.0118705	0.0002271	0.0000876	1.92E-06	0.0493282	0.0000241	0.219238	0.0004326
22046-01F	MR226	Monduli	60F	17/03/2013	matrix	15	2.389932	0.0213991	0.0229285	0.0000619	2.13E-07	1.003707	1.60E-15	4.35E-14	0.020282	0.0004834	3.479991	2.595232	0.0462517	5.086655	0.0906533	0.0059822	2.63E-06	0.0180009	0.0004612	27.21851	0.1357947	21.41166	0.1918436	78.52269	0.7239403	38.87685	1.001311	0.1024671	0.0003968	0.0037646	0.0000113	0.0000678	1.71E-06	0.00977	0.0001709	0.0000764	1.80E-06	0.0230579	0.0000219	0.1024671	0.0003968
22046-01G	MR226	Monduli	60F	17/03/2013	matrix	17	2.363363	0.0594697	0.0600245	0.0000619	2.13E-07	1.003733	5.22E-16	1.64E-14	0.0365561	0.0013981	4.558616	6.127	0.1071342	12.00892	0.2099831	0.006809	6.10E-06	0.0212264	0.0010341	31.50034	0.3437524	21.17346	0.5331406	66.92531	1.786505	38.92865	1.001311	0.038691	0.0003837	0.0012283	5.08E-06	0.0000261	1.26E-06	0.0075256	0.0001273	0.0000449	1.71E-06	0.0090781	0.0000206	0.038691	0.0003837
22046-01H	MR226	Monduli	60F	17/03/2013	matrix	21	2.298743	0.101254	0.1015633	0.0000619	2.13E-07	1.003748	3.07E-16	1.18E-14	0.0639239	0.002414	4.869363	11.44403	0.2462593	22.43031	0.4826682	0.0186759	0.000014	0.0302887	0.0014646	38.58614	0.5771771	20.59416	0.9077009	52.93862	2.421253	38.95623	1.001312	0.0279016	0.000381	0.0007231	4.01E-06	0.0000219	1.04E-06	0.0082752	0.0001713	0.0000462	1.73E-06	0.0065026	0.0000206	0.0279016	0.0003810
22046-01I	MR226	Monduli	60F	17/03/2013	matrix	25	1.980658	0.2902215	0.2903018	0.0000619	2.13E-07	1.003760	1.04E-16	4.42E-15	0.0884998	0.0068168	5.429383	17.66575	0.6162552	34.62487	1.20786	0.0222924	0.000035	0.0359402	0.0040987	42.51287	1.689148	17.74292	2.601258	41.21187	6.201354	38.98153	1.001312	0.0103983	0.0003823	0.0002446	3.29E-06	8.79E-06	9.88E-07	0.0043209	0.0001383	0.0000216	1.64E-06	0.0026398	0.00002	0.0103983	0.0003823
22046-01J	MR226	Monduli	60F	17/03/2013	matrix	30	1.916534	0.6938492	0.6938807	0.0000619	2.13E-07	1.003802	4.33E-17	2.08E-15	0.1108038	0.0165822	5.836825	23.77761	1.403141	46.60412	2.750157	0.0140261	0.0000798	0.0370681	0.0083731	48.03451	4.283964	17.16818	6.218756	35.13763	12.92681	39.06267	1.001313	0.0048961	0.0003791	0.0001019	4.24E-06	3.78E-06	8.32E-07	0.0024236	0.0000998	0.0000113	1.62E-06	0.001201	0.0000208	0.0048961	0.0003791
22046-01K	MR226	Monduli	60F	17/03/2013	matrix	35	2.189628	1.07038	1.070407	0.0000619	2.13E-07	1.003815	2.76E-17	1.32E-15	0.1007763	0.025071	5.717102	21.18225	1.925031	41.51722	3.77306	0.0703576	0.0001094	0.054698	0.0128616	47.69366	6.519848	19.61602	9.59494	40.51037	20.28436	39.0893	1.001313	0.0031037	0.000379	0.0000651	3.70E-06	3.56E-06	8.05E-07	0.0013784	0.0000965	6.56E-06	1.59E-06	0.0007994	0.0000214	0.0031037	0.000379
REGIONAL FLOOD LAVAS
22035-01A	MR110	Regional floods	60E	13/03/2013	matrix	3	4.867434	0.311914	0.3122232	0.0000624	1.78E-07	1.002487	3.34E-16	1.55E-13	1.409077	0.0130614	0.0328832	1.703825	0.0950919	3.339497	0.1863802	0.0963869	5.41E-06	0.3123875	0.0046483	463.8981	3.943121	43.32363	2.780004	9.327743	0.5698024	35.42899	1.001278	0.3649209	0.0012254	0.0007866	6.07E-06	0.0002457	3.10E-06	0.0013403	0.0000739	0.0011084	5.58E-06	0.0817586	0.0002506	0.3649209	0.0012254
22035-01B	MR110	Regional floods	60E	13/03/2013	matrix	5	2.95973	0.0614485	0.0620269	0.0000624	1.78E-07	1.002487	1.08E-15	1.36E-13	0.3350045	0.0019177	0.1020391	1.25708	0.0416532	2.463877	0.0816402	0.0466271	2.37E-06	0.0917106	0.0014572	126.2406	0.5111322	26.32977	0.547095	20.8383	0.39897	35.45328	1.001278	0.3206307	0.0005769	0.0025398	9.05E-06	0.0002329	3.59E-06	0.0031928	0.0001049	0.0008509	3.79E-06	0.0709616	0.0001113	0.3206307	0.0005769
22035-01C	MR110	Regional floods	60E	13/03/2013	matrix	7	2.513747	0.0339407	0.0346915	0.0000624	1.78E-07	1.002487	1.56E-15	9.28E-14	0.1241339	0.000856	0.2216062	1.011686	0.0269222	1.982905	0.0527674	0.0362988	1.53E-06	0.0481991	0.0006456	59.32965	0.2001669	22.35954	0.3021102	37.6603	0.4944194	35.47656	1.001278	0.2184933	0.0005601	0.0036827	7.73E-06	0.0001775	2.33E-06	0.0037257	0.0000986	0.0004571	3.00E-06	0.0487779	0.0000398	0.2184933	0.0005601
22035-01D	MR110	Regional floods	60E	13/03/2013	matrix	9	2.390427	0.0369897	0.0376144	0.0000624	1.78E-07	1.002487	1.36E-15	5.92E-14	0.0751343	0.0009105	0.334777	0.9250836	0.0302667	1.813164	0.0593227	0.0278349	1.72E-06	0.0359986	0.000636	43.60937	0.2579065	21.2619	0.329227	48.72407	0.7440757	35.54676	1.001279	0.1394279	0.0005719	0.0031972	0.0000133	0.0001151	1.96E-06	0.0029577	0.0000957	0.0002402	2.73E-06	0.0315045	0.0000234	0.1394279	0.0005719
22035-01E	MR110	Regional floods	60E	13/03/2013	matrix	12	2.380973	0.0385444	0.0391395	0.0000624	1.78E-07	1.002487	1.26E-15	5.23E-14	0.0689357	0.0009284	0.4057616	1.028695	0.0327877	2.016242	0.0642639	0.0207973	1.86E-06	0.032393	0.000682	41.66435	0.2627225	21.17776	0.3430627	50.79313	0.8207524	35.57092	1.001279	0.1231756	0.0005703	0.0029564	0.0000123	0.0000958	1.97E-06	0.0030412	0.0000958	0.0002038	2.61E-06	0.0278622	0.0000234	0.1231756	0.0005703
22035-01F	MR110	Regional floods	60E	13/03/2013	matrix	15	2.338134	0.0281971	0.0289769	0.0000624	1.78E-07	1.002487	1.68E-15	6.36E-14	0.0576888	0.0006631	1.284754	2.725182	0.0431351	5.341358	0.0845448	0.0110061	2.46E-06	0.0268166	0.000508	37.76201	0.1978812	20.79647	0.2509606	54.96678	0.6555798	35.59405	1.001279	0.1497228	0.0005556	0.0039649	0.0000143	0.0001063	1.97E-06	0.0108051	0.000166	0.0002287	2.49E-06	0.0340311	0.0000241	0.1497228	0.0005556
22035-01G	MR110	Regional floods	60E	13/03/2013	matrix	17	2.304675	0.0294274	0.0301544	0.0000624	1.78E-07	1.002487	1.58E-15	5.55E-14	0.0500391	0.0006951	2.110244	3.882486	0.0437678	7.609674	0.0857849	0.008054	2.50E-06	0.024302	0.0004609	35.06964	0.1719384	20.49868	0.2619058	58.29117	0.7660925	35.61741	1.001279	0.1307926	0.0005562	0.0037295	8.59E-06	0.0000906	1.70E-06	0.0144798	0.0001593	0.0001866	2.56E-06	0.0297701	0.0000222	0.1307926	0.0005562
22035-01H	MR110	Regional floods	60E	13/03/2013	matrix	19	2.328113	0.0308738	0.0315816	0.0000624	1.78E-07	1.002487	1.48E-15	5.03E-14	0.0463323	0.0007113	2.769494	4.717873	0.0547442	9.247032	0.1072987	0.0078656	3.12E-06	0.0235006	0.0004932	34.09065	0.1799393	20.70728	0.2747827	60.5393	0.840673	35.6631	1.00128	0.1185513	0.0005731	0.0034775	6.73E-06	0.0000817	1.70E-06	0.0164066	0.0001872	0.0001611	2.45E-06	0.0270914	0.0000214	0.1185513	0.0005731
22035-01I	MR110	Regional floods	60E	13/03/2013	matrix	21	2.310969	0.045161	0.0456407	0.0000624	1.78E-07	1.002487	1.00E-15	3.28E-14	0.0424325	0.0010208	3.581633	5.58775	0.0771886	10.95199	0.1512897	0.0098334	4.40E-06	0.0234048	0.0006601	32.6907	0.2922966	20.5547	0.401938	62.62784	1.269875	35.68729	1.00128	0.0771284	0.0005722	0.0023593	0.0000114	0.0000552	1.53E-06	0.0131834	0.00017	0.0001001	2.36E-06	0.0176827	0.0000248	0.0771284	0.0005722
22035-01J	MR110	Regional floods	60E	13/03/2013	matrix	25	2.313523	0.0486724	0.0491188	0.0000624	1.78E-07	1.002487	9.47E-16	3.08E-14	0.0421341	0.001123	3.907963	6.05395	0.0890124	11.86574	0.1744643	0.0044355	5.07E-06	0.021468	0.0006587	32.57953	0.3004232	20.57743	0.4331902	62.8901	1.377575	35.71077	1.00128	0.072617	0.0005692	0.0022289	0.0000104	0.0000479	1.44E-06	0.0134937	0.0001875	0.0000939	2.46E-06	0.0167092	0.000022	0.072617	0.0005692
22035-01K	MR110	Regional floods	60E	13/03/2013	matrix	30	2.336664	0.0613654	0.0617271	0.0000624	1.78E-07	1.002487	7.39E-16	2.64E-14	0.0518435	0.0013789	3.197066	6.093976	0.1042442	11.94419	0.2043186	0.0053496	5.93E-06	0.0236215	0.0008394	35.6801	0.3700197	20.78339	0.5461661	57.99802	1.609667	35.78263	1.001281	0.0621227	0.0006032	0.0017411	5.78E-06	0.0000411	1.45E-06	0.0106102	0.0001775	0.0000903	2.38E-06	0.014032	0.000029	0.0621227	0.0006032
22035-01L	MR110	Regional floods	60E	13/03/2013	matrix	35	2.393886	0.0963776	0.0966197	0.0000624	1.78E-07	1.002487	5.23E-16	2.65E-14	0.0999967	0.0022724	1.552797	5.708952	0.1315418	11.18955	0.257822	0.0061478	7.48E-06	0.0330374	0.0011962	50.60329	0.5956545	21.29268	0.8578101	41.90745	1.722949	35.8071	1.001281	0.0623278	0.0006431	0.0012317	6.67E-06	0.0000407	1.45E-06	0.0070317	0.000157	0.0001232	2.72E-06	0.0135527	0.0000963	0.0623278	0.0006431
22047-01A	MR240	Regional floods	60F	18/03/2013	wr	3	9.706542	1.290965	1.291346	0.0000617	2.00E-07	1.003828	1.21E-16	3.56E-13	9.608939	0.2252614	0.0081655	2.884963	0.2538159	5.654527	0.4974792	0.2176381	0.0000144	1.908023	0.047318	2956.331	68.87471	87.41815	11.65787	2.950917	0.3335715	39.11463	1.001313	0.8389115	0.0012582	0.0002838	6.52E-06	0.0005414	4.64E-06	0.0008187	0.0000692	0.0027267	8.34E-06	0.1901806	0.0003304	0.8389115	0.0012582
22047-01B	MR240	Regional floods	60F	18/03/2013	wr	5	3.47149	0.1746874	0.1750486	0.0000617	2.00E-07	1.003842	8.78E-16	3.28E-13	1.14765	0.0075463	0.0541307	2.284267	0.0533852	4.477164	0.104635	0.0332739	3.04E-06	0.2410604	0.002304	373.6748	2.178797	31.2106	1.572047	8.338795	0.371689	39.14101	1.001313	0.7726516	0.001354	0.0020677	0.0000113	0.0004984	3.85E-06	0.0047232	0.0001068	0.002373	8.44E-06	0.1743966	0.0003804	0.7726516	0.001354
22047-01C	MR240	Regional floods	60F	18/03/2013	wr	7	2.429089	0.0168455	0.0185919	0.0000617	2.00E-07	1.003868	4.08E-15	2.01E-13	0.0921405	0.0004235	0.443319	1.502083	0.0203063	2.944084	0.0398004	0.0015534	1.16E-06	0.0301353	0.0003297	49.20203	0.1379162	21.83253	0.1515081	44.32648	0.2586786	39.1928	1.001314	0.4727285	0.0005958	0.0096079	0.0000232	0.0002895	3.06E-06	0.0144319	0.0001911	0.0008853	3.45E-06	0.1068342	0.0000769	0.4727285	0.0005958
22047-01D	MR240	Regional floods	60F	18/03/2013	wr	9	2.355772	0.0088293	0.0116691	0.0000617	2.00E-07	1.003882	5.02E-15	1.22E-13	0.0111914	0.0001757	2.717611	1.118487	0.0170758	2.192234	0.0334687	0.0013675	9.73E-07	0.0147469	0.0002302	24.40804	0.0641584	21.17313	0.0794073	86.68008	0.2825359	39.2204	1.001314	0.2882367	0.0004004	0.0118091	0.0000252	0.0001741	2.67E-06	0.0132083	0.0001988	0.0001322	2.05E-06	0.0643806	0.0000233	0.2882367	0.0004004
22047-01E	MR240	Regional floods	60F	18/03/2013	wr	12	2.348765	0.0110507	0.0134158	0.0000617	2.00E-07	1.003895	3.34E-15	8.83E-14	0.0182487	0.0002542	1.600613	1.074195	0.021138	2.105423	0.0414305	0.0038878	1.20E-06	0.0169551	0.0002569	26.45671	0.0653195	21.11011	0.099386	79.73232	0.3849459	39.2468	1.001314	0.2078855	0.0004152	0.0078576	0.0000101	0.0001332	1.99E-06	0.0084406	0.0001651	0.0001434	1.99E-06	0.0461165	0.000024	0.2078855	0.0004152
22047-01F	MR240	Regional floods	60F	18/03/2013	wr	15	2.308754	0.0257746	0.0268373	0.0000617	2.00E-07	1.003936	1.49E-15	5.33E-14	0.0506503	0.0006207	1.086431	2.02342	0.0406918	3.965904	0.079756	0.0015975	2.32E-06	0.0222669	0.0004992	35.68148	0.188839	20.75027	0.2318014	58.07166	0.6199949	39.32693	1.001315	0.1254395	0.0004077	0.0035155	0.0000142	0.0000783	1.71E-06	0.0071134	0.0001395	0.0001781	2.06E-06	0.0277359	0.0000262	0.1254395	0.0004077
22047-01G	MR240	Regional floods	60F	18/03/2013	wr	17	2.380454	0.0582702	0.058778	0.0000617	2.00E-07	1.00395	6.15E-16	3.51E-14	0.1212651	0.0014915	1.103217	4.918774	0.098555	9.640797	0.1931678	0.0107934	5.61E-06	0.0387018	0.0011364	57.13246	0.3528782	21.39511	0.5240679	37.31776	0.9071015	39.35446	1.001315	0.0826962	0.0003977	0.0014474	5.35E-06	0.000056	1.62E-06	0.0071197	0.0001396	0.0001755	2.06E-06	0.0183145	0.0000228	0.0826962	0.0003977
22047-01H	MR240	Regional floods	60F	18/03/2013	wr	21	2.500855	0.1046997	0.1050125	0.0000617	2.00E-07	1.003963	3.66E-16	3.53E-14	0.2515097	0.0033501	1.18991	11.00304	0.211161	21.56596	0.4138755	0.0070187	0.000012	0.0618344	0.0018629	96.5125	0.9599346	22.47801	0.9417067	23.10822	0.9353908	39.38101	1.001315	0.0832068	0.000401	0.0008621	7.36E-06	0.0000533	1.53E-06	0.0094861	0.0001619	0.0002168	2.20E-06	0.0182927	0.0000222	0.0832068	0.000401
22047-01I	MR240	Regional floods	60F	18/03/2013	wr	25	2.391572	0.355711	0.3557953	0.0000617	2.00E-07	1.003976	9.09E-17	1.12E-14	0.3436008	0.0119123	1.081939	13.66779	0.6609939	26.78888	1.295548	0.0069374	0.0000376	0.0791494	0.0052503	122.7795	3.513937	21.49511	3.199199	17.33706	2.549569	39.40658	1.001316	0.0262925	0.000385	0.0002141	5.17E-06	0.0000169	1.04E-06	0.0029269	0.0001217	0.0000736	1.81E-06	0.0058834	0.0000216	0.0262925	0.000385
22047-01J	MR240	Regional floods	60F	18/03/2013	wr	30	2.126899	0.706445	0.7064786	0.0000617	2.00E-07	1.004002	4.30E-17	5.16E-15	0.341875	0.0216189	1.115037	14.01515	1.040105	27.4697	2.038605	-0.0056506	0.0000591	0.0744675	0.0097884	119.8741	6.212624	19.11486	6.352704	15.78698	5.225514	39.4577	1.001316	0.012144	0.000381	0.0001013	4.09E-06	7.54E-06	9.35E-07	0.0014198	0.0000876	0.0000346	1.67E-06	0.0027845	0.0000216	0.012144	0.000381
22047-01K	MR240	Regional floods	60F	18/03/2013	wr	35	2.456772	1.079905	1.079934	0.0000617	2.00E-07	1.004015	2.77E-17	2.79E-15	0.2681829	0.0279207	1.355401	13.36413	1.352854	26.1937	2.651595	-0.0210274	0.0000769	0.055227	0.0145562	100.8691	7.536252	22.08152	9.712813	21.68341	9.565811	39.48445	1.001316	0.0065797	0.0003821	0.0000652	2.95E-06	3.60E-06	9.28E-07	0.0008717	0.0000784	0.0000175	1.64E-06	0.0015967	0.0000216	0.0065797	0.0003821
TAROSERO
22009-01A	10-TRS-01	Tarosero	60C	23/02/2013	matrix	3	3.281429	0.2418152	0.2419327	0.0000627	1.44E-07	1.004913	1.29E-15	2.02E-13	0.4283391	0.010631	0.0037923	0.0600516	0.0132723	0.1177011	0.0260136	0.0558618	7.54E-07	0.1126304	0.0033207	156.9165	3.359737	29.01554	2.140159	18.49037	1.298236	25.08147	1.001154	0.4749189	0.0028516	0.0030266	0.0000612	0.0003409	7.15E-06	0.0001818	0.0000398	0.0012964	0.0000181	0.1098352	0.0013002	0.4749189	0.0028516
22009-01B	10-TRS-01	Tarosero	60C	23/02/2013	matrix	5	2.515416	0.0193895	0.0202329	0.0000627	1.44E-07	1.004889	1.02E-14	2.84E-13	0.0184456	0.0002237	0.029373	0.0202512	0.0023031	0.0396924	0.0045141	0.005159	1.31E-07	0.0174736	0.0002619	27.74428	0.1917387	22.23747	0.1715318	80.15244	0.4024183	25.0968	1.001154	0.6685914	0.0017837	0.0240984	0.0001502	0.0004211	5.66E-06	0.000488	0.0000551	0.0004445	4.60E-06	0.1494442	0.0008403	0.6685914	0.0017837
22009-01C	10-TRS-01	Tarosero	60C	23/02/2013	matrix	7	2.345965	0.0082427	0.0098496	0.0000627	1.44E-07	1.004843	1.22E-14	2.72E-13	0.0050236	0.0000921	0.079795	0.0150695	0.0014668	0.0295362	0.0028748	0.0013088	8.34E-08	0.0136027	0.0001678	22.23785	0.0700495	20.73846	0.0729133	93.25945	0.2744378	25.12783	1.001154	0.6394229	0.0011365	0.0287538	0.0000712	0.0003911	4.67E-06	0.0004333	0.000042	0.0001444	2.62E-06	0.1437655	0.0002011	0.6394229	0.0011365
22009-01D	10-TRS-01	Tarosero	60C	23/02/2013	matrix	9	2.358261	0.0105748	0.0118829	0.0000627	1.44E-07	1.004820	6.45E-15	1.48E-13	0.0072862	0.0001627	0.0767853	0.020901	0.00292	0.0409659	0.0057233	0.0012341	1.66E-07	0.0140055	0.0002429	23.02171	0.0847873	20.84724	0.0935428	90.55612	0.3429135	25.14305	1.001155	0.3495423	0.0006966	0.0151832	0.0000452	0.0002126	3.59E-06	0.0003173	0.0000441	0.0001106	2.45E-06	0.0777242	0.0000817	0.3495423	0.0006966
22009-01E	10-TRS-01	Tarosero	60C	23/02/2013	matrix	12	2.334009	0.0125899	0.0136851	0.0000627	1.44E-07	1.004797	5.58E-15	1.51E-13	0.0217429	0.0002369	0.1987227	0.159185	0.0055085	0.3120026	0.0107967	0.0026684	3.13E-07	0.017234	0.0002901	27.11081	0.1058995	20.63271	0.1113669	76.09845	0.3232026	25.15831	1.001155	0.3563071	0.0005831	0.0131426	0.0000452	0.0002265	3.69E-06	0.0020921	0.0000717	0.0002858	2.95E-06	0.0775851	0.0000533	0.3563071	0.0005831
22009-01F	10-TRS-01	Tarosero	60C	23/02/2013	matrix	17	2.325126	0.0140346	0.0150176	0.0000627	1.44E-07	1.004721	5.84E-15	2.15E-13	0.0546613	0.0003237	0.1373504	0.276352	0.0067336	0.5416499	0.0131979	0.0033316	3.83E-07	0.0236959	0.0003116	36.85078	0.1396749	20.55413	0.1241461	55.76676	0.2507196	25.20854	1.001156	0.5067068	0.0005993	0.0137502	0.0000482	0.0003258	4.08E-06	0.0037999	0.0000912	0.0007516	3.56E-06	0.1115982	0.0000456	0.5067068	0.0005993
22009-01G	10-TRS-01	Tarosero	60C	23/02/2013	matrix	20	2.331983	0.0230798	0.023694	0.0000627	1.44E-07	1.004698	2.63E-15	1.20E-13	0.084083	0.0005796	0.0757223	0.2344113	0.0086474	0.4594461	0.0169489	0.0021837	4.92E-07	0.0288772	0.0005431	45.70107	0.1390176	20.61478	0.2041582	45.10105	0.4218828	25.22401	1.001156	0.2826674	0.0005632	0.0061851	0.0000134	0.0001786	3.30E-06	0.0014499	0.0000531	0.0005201	3.40E-06	0.0621422	0.000025	0.2826674	0.0005632
22009-01H	10-TRS-01	Tarosero	60C	23/02/2013	matrix	25	2.293388	0.0394994	0.0398496	0.0000627	1.44E-07	1.004675	1.31E-15	7.10E-14	0.1138889	0.0010112	0.0523364	0.2194691	0.0144518	0.4301594	0.0283255	0.0062947	8.22E-07	0.0359436	0.000779	54.26149	0.2634677	20.27339	0.3493943	37.35705	0.6245992	25.23936	1.001156	0.1672719	0.0005511	0.0030827	0.0000105	0.0001108	2.35E-06	0.0006766	0.0000443	0.0003511	2.87E-06	0.0367804	0.0000256	0.1672719	0.0005511
22009-01I	10-TRS-01	Tarosero	60C	23/02/2013	matrix	35	2.508221	0.0836408	0.0838392	0.0000627	1.44E-07	1.004652	5.58E-16	3.68E-14	0.1465696	0.0021147	0.039072	0.2108746	0.0306931	0.4133142	0.0601585	0.0015232	1.74E-06	0.0404916	0.00147	65.92123	0.5762028	22.17381	0.7399371	33.63216	1.115564	25.25463	1.001156	0.0865408	0.0005554	0.0013128	7.48E-06	0.0000532	1.89E-06	0.0002768	0.0000401	0.0001924	2.54E-06	0.0190434	0.0000283	0.0865408	0.0005554
22004-01A	10-TRS-02	Tarosero	60C	12/02/2013	wr	3	2.394621	0.3560252	0.3561614	0.0000626	2.58E-07	1.005865	7.80E-17	2.70E-14	1.087853	0.0403455	0.0020618	0.0827939	0.156987	0.1622761	0.3076946	-0.0261696	8.92E-06	0.2093205	0.0101977	346.0374	12.55517	21.20097	3.15419	6.12644	0.8659514	20.33805	1.001079	0.0635966	0.000216	0.0001838	6.52E-06	0.0000385	1.24E-06	0.0000152	0.0000287	0.0001999	1.69E-06	0.0137224	0.0000228	-0.0000253	0.0000426
22004-01B	10-TRS-02	Tarosero	60C	12/02/2013	wr	5	1.951999	0.0752834	0.0757105	0.0000626	2.58E-07	1.005857	4.91E-16	7.57E-14	0.4585725	0.0032325	0.0016092	0.0274621	0.024038	0.0538257	0.0471145	0.0119325	1.37E-06	0.1032129	0.0017092	154.2126	0.934317	17.28006	0.6668063	11.20519	0.3933354	20.35473	1.001079	0.1783533	0.0002929	0.0011565	6.59E-06	0.0001194	1.83E-06	0.0000318	0.0000276	0.0005304	2.12E-06	0.0389221	0.0000244	0.0001604	0.0000433
22004-01C	10-TRS-02	Tarosero	60C	13/02/2013	wr	7	2.355917	0.029888	0.0314201	0.0000626	2.58E-07	1.005842	1.28E-15	9.05E-14	0.1676432	0.0008961	0.0021259	0.0134345	0.0095272	0.0263317	0.0186734	-0.001987	5.42E-07	0.0432826	0.0006951	70.91746	0.2370136	20.85808	0.2647861	29.41179	0.338132	20.39001	1.00108	0.2131012	0.000271	0.0030049	9.00E-06	0.0001301	2.03E-06	0.0000404	0.0000285	0.0005038	2.21E-06	0.0459801	0.0000206	0.0007126	0.0000354
22004-01D	10-TRS-02	Tarosero	60C	13/02/2013	wr	9	2.381026	0.0136024	0.016762	0.0000626	2.58E-07	1.005834	2.84E-15	9.91E-14	0.0462419	0.0003275	0.0125574	0.0216805	0.0044697	0.0424937	0.0087607	0.001718	2.54E-07	0.0215544	0.000373	34.88748	0.1199783	21.08053	0.1205086	60.42464	0.2744051	20.40748	1.00108	0.2334104	0.0002276	0.0066904	0.0000215	0.0001442	2.42E-06	0.0001451	0.0000297	0.0003094	1.94E-06	0.0504992	0.0000219	0.0014943	0.0000354
22004-01E	10-TRS-02	Tarosero	60C	13/02/2013	wr	12	2.37104	0.0059128	0.011406	0.0000626	2.58E-07	1.005826	7.53E-15	1.70E-13	0.0054941	0.0000771	0.0379653	0.0080005	0.0016421	0.015681	0.0032186	0.000561	9.33E-08	0.0134343	0.0001687	22.6326	0.0495914	20.99206	0.0523833	92.75377	0.1545484	20.42503	1.00108	0.4012814	0.0003404	0.0177302	0.0000343	0.0002382	2.92E-06	0.0001419	0.0000289	0.0000974	1.35E-06	0.0862824	0.0000248	0.0039319	0.0000326
22004-01F	10-TRS-02	Tarosero	60C	13/02/2013	wr	17	2.347608	0.0030946	0.0101412	0.0000626	2.58E-07	1.005804	1.46E-14	3.06E-13	0.0006488	0.000034	0.4887043	0.011989	0.0010071	0.0234984	0.001974	0.0028389	5.72E-08	0.0133014	0.0001015	20.97779	0.0255594	20.78447	0.0274161	99.08095	0.0912581	20.47594	1.001081	0.7217071	0.0003919	0.0344034	0.0000343	0.0004576	3.42E-06	0.0004125	0.0000344	0.0000223	1.17E-06	0.1573064	0.0000275	0.0072583	0.0000354
22004-01G	10-TRS-02	Tarosero	60C	13/02/2013	wr	25	2.340542	0.0042074	0.0105076	0.0000626	2.58E-07	1.005796	1.49E-14	3.11E-13	0.0005898	0.0000348	0.9285033	0.0204662	0.000947	0.0401138	0.0018561	0.0017877	5.38E-08	0.0129274	0.000112	20.89677	0.0359826	20.72187	0.0372741	99.16496	0.1125161	20.49351	1.001081	0.7320951	0.0005183	0.0350339	0.0000522	0.0004529	3.81E-06	0.000717	0.000033	0.0000207	1.22E-06	0.1571467	0.0000283	0.0073295	0.000034
22004-01H	10-TRS-02	Tarosero	60C	13/02/2013	wr	35	2.345757	0.0070783	0.0119676	0.0000626	2.58E-07	1.005788	5.74E-15	1.21E-13	0.0010133	0.0000837	0.672342	0.0253793	0.0024626	0.0497435	0.0048267	0.002698	1.40E-07	0.0133213	0.0001773	21.06895	0.0581508	20.76807	0.0627084	98.57345	0.192065	20.51104	1.001082	0.2845276	0.0003024	0.0135046	0.0000333	0.0001799	2.32E-06	0.0003427	0.0000331	0.0000137	1.13E-06	0.0611717	0.0000227	0.00277	0.0000354
22004-01I	10-TRS-02	Tarosero	60C	20/02/2013	wr	10	2.348643	0.018749	0.0210921	0.0000626	2.58E-07	1.000000	1.48E-15	3.14E-14	0.0013753	0.0001848	0.3190837	0.0164655	0.0091205	0.0322725	0.0178761	0.003355	5.18E-07	0.0136169	0.0005178	21.20347	0.1575727	20.79364	0.1661022	98.06929	0.4567128	23.84813	1.001136	0.0739967	0.0001976	0.0034898	0.000022	0.0000475	1.77E-06	0.0000575	0.0000318	4.80E-06	6.44E-07	0.0159273	0.0000262	0.0008645	0.000035
22004-01J	10-TRS-02	Tarosero	60C	21/02/2013	wr	15	2.345885	0.0112924	0.0148542	0.0000626	2.58E-07	1.000000	6.39E-15	1.36E-13	0.0014573	0.0000552	0.5369284	0.0290986	0.0026263	0.0570332	0.0051476	0.0006157	1.50E-07	0.0126873	0.0002094	21.20229	0.096844	20.7692	0.1000414	97.95855	0.2780627	23.86448	1.001136	0.3192412	0.0006072	0.0150569	0.000043	0.000191	3.04E-06	0.0004381	0.0000395	0.0000219	8.28E-07	0.0698256	0.0000248	0.0032496	0.00002
22004-01K	10-TRS-02	Tarosero	60C	21/02/2013	wr	20	2.342888	0.0082058	0.0126581	0.0000626	2.58E-07	1.000000	6.09E-15	1.31E-13	0.0023368	0.0000582	0.5584677	0.0483106	0.0021794	0.0946889	0.0042716	0.0015759	1.24E-07	0.0131843	0.0002153	21.43654	0.0720301	20.74266	0.072697	96.76294	0.107474	23.91673	1.001137	0.3074547	0.0001567	0.0143426	0.0000451	0.0001891	3.01E-06	0.0006929	0.0000311	0.0000335	8.27E-07	0.0681032	0.0000233	0.0030215	0.000028
22004-01L	10-TRS-02	Tarosero	60C	21/02/2013	wr	25	2.346396	0.0074513	0.012194	0.0000626	2.58E-07	1.000000	2.55E-15	5.55E-14	0.0034409	0.0001124	0.5427665	0.0689945	0.0044053	0.1352293	0.0086345	0.0007524	2.50E-07	0.0131087	0.0003386	21.79533	0.0579218	20.77373	0.0660132	95.31114	0.1889993	23.93189	1.001137	0.1307172	0.0001036	0.0059975	0.000014	0.0000786	2.01E-06	0.0004138	0.0000263	0.0000206	6.72E-07	0.028769	0.0000216	0.0013914	0.000035
22004-01M	10-TRS-02	Tarosero	60C	21/02/2013	wr	35	2.376541	0.0186031	0.0210156	0.0000626	2.58E-07	1.000000	5.95E-16	1.35E-14	0.0058689	0.0003725	1.018931	0.2201862	0.0171752	0.4315649	0.0336635	0.0068977	9.76E-07	0.0156818	0.0008753	22.77287	0.1273332	21.0408	0.1648121	92.38253	0.6469996	23.94824	1.001137	0.0319048	0.0000991	0.001401	6.31E-06	0.000022	1.21E-06	0.0003085	0.0000239	8.22E-06	5.21E-07	0.0069207	0.0000208	0.0002889	0.000033
22003-01A	10-TRS-02	Tarosero	60C	12/02/2013	plag	3	2.827871	0.2705333	0.2706686	0.0000628	1.90E-07	1.005957	1.07E-16	2.99E-14	0.8498015	0.0194693	0.003799	0.1190238	0.1111337	0.2332867	0.2178221	0.0116365	6.32E-06	0.177245	0.0062817	278.7325	6.059517	24.98436	2.392047	8.962828	0.8030696	20.13177	1.001075	0.070428	0.0002318	0.0002527	5.33E-06	0.0000448	1.25E-06	0.0000301	0.0000279	0.0002147	1.72E-06	0.0151275	0.0000219	-0.000151	0.0000389
22003-01B	10-TRS-02	Tarosero	60C	12/02/2013	plag	5	2.568426	0.098307	0.0986138	0.0000628	1.90E-07	1.005950	3.09E-16	3.80E-14	0.3364537	0.0037426	0.0120609	0.1495202	0.040062	0.2930596	0.0785215	-0.0019878	2.28E-06	0.0752664	0.002103	123.1451	1.08083	22.69052	0.8691024	18.42399	0.6568045	20.1484	1.001075	0.0894707	0.0002306	0.0007265	5.96E-06	0.0000547	1.44E-06	0.0001086	0.0000289	0.0002444	1.80E-06	0.0191807	0.00002	0.0000585	0.000035
22003-01C	10-TRS-02	Tarosero	60C	12/02/2013	plag	7	2.348935	0.0311212	0.0319227	0.0000628	1.90E-07	1.005942	8.90E-16	3.20E-14	0.0510491	0.000753	0.0475778	0.0896262	0.0144246	0.1756673	0.0282722	-0.0003996	8.20E-07	0.0217324	0.0006218	35.98608	0.2813705	20.75018	0.2750995	57.65915	0.6531337	20.16556	1.001076	0.0754102	0.0002294	0.0020955	0.0000147	0.0000455	1.25E-06	0.0001878	0.00003	0.000107	1.38E-06	0.0162233	0.0000226	0.0003639	0.0000488
22003-01D	10-TRS-02	Tarosero	60C	12/02/2013	plag	9	2.395867	0.0147882	0.01647	0.0000628	1.90E-07	1.005934	1.61E-15	4.03E-14	0.0130669	0.0003287	0.1476824	0.0712785	0.0079634	0.1397059	0.0156082	0.0035252	4.53E-07	0.0158889	0.0004393	25.06082	0.0924732	21.16505	0.1307253	84.45285	0.508381	20.18266	1.001076	0.0948183	0.0002333	0.0037835	9.78E-06	0.0000601	1.63E-06	0.0002697	0.0000299	0.0000494	1.24E-06	0.0202041	0.0000248	0.0006266	0.0000472
22003-01E	10-TRS-02	Tarosero	60C	12/02/2013	plag	12	2.335848	0.0082538	0.0108672	0.0000628	1.90E-07	1.005919	3.33E-15	7.63E-14	0.0076923	0.0001741	0.2944812	0.0836126	0.0050139	0.1638806	0.0098273	0.0018352	2.85E-07	0.0142871	0.0002377	22.92421	0.053272	20.63451	0.0729599	90.00927	0.2914275	20.21742	1.001077	0.1797761	0.0002424	0.0078422	0.0000137	0.000112	1.83E-06	0.0006557	0.0000391	0.0000603	1.36E-06	0.0393852	0.0000294	0.0017132	0.0000462
22003-01F	10-TRS-02	Tarosero	60C	12/02/2013	plag	17	2.339714	0.0081941	0.0108296	0.0000628	1.90E-07	1.005911	5.92E-15	1.57E-13	0.0196451	0.000137	0.112258	0.0814098	0.0028258	0.1595633	0.0055386	0.0014452	1.61E-07	0.0164178	0.000209	26.52782	0.0717809	20.66868	0.0724328	77.91078	0.1799392	20.23462	1.001077	0.3696949	0.0003105	0.0139361	0.0000343	0.0002288	2.82E-06	0.0011345	0.000039	0.0002738	1.78E-06	0.0798629	0.0000354	0.0029305	0.0000482
22003-01G	10-TRS-02	Tarosero	60C	12/02/2013	plag	25	2.339562	0.0064617	0.0095856	0.0000628	1.90E-07	1.005903	8.34E-15	1.99E-13	0.0107048	0.0000852	0.2133121	0.0842831	0.0021822	0.1651948	0.0042771	0.0013284	1.24E-07	0.0146832	0.0001789	23.85655	0.05587	20.66733	0.0571188	86.62906	0.1580214	20.25197	1.001077	0.4683759	0.0004188	0.019633	0.0000403	0.0002883	3.42E-06	0.0016547	0.0000425	0.0002102	1.61E-06	0.1004874	0.0000384	0.0040578	0.0000569
22003-01H	10-TRS-02	Tarosero	60C	12/02/2013	plag	35	2.343226	0.0085896	0.0111386	0.0000628	1.90E-07	1.005880	5.17E-15	1.22E-13	0.0095767	0.0001161	0.2434916	0.0860616	0.0033737	0.1686806	0.0066125	0.0020017	1.92E-07	0.0147015	0.0002216	23.55189	0.0736635	20.69972	0.0759283	87.8871	0.2435319	20.30337	1.001078	0.2866053	0.0004179	0.0121691	0.0000323	0.0001789	2.62E-06	0.0010473	0.0000407	0.0001165	1.38E-06	0.0621739	0.0000283	0.0026258	0.000042
22003-01I	10-TRS-02	Tarosero	60C	12/02/2013	plag	45	2.342235	0.0063484	0.0095156	0.0000628	1.90E-07	1.005873	8.04E-15	1.90E-13	0.0098375	0.0000873	0.2346092	0.0851839	0.0024504	0.1669605	0.0048028	0.0012484	1.39E-07	0.0144912	0.0001485	23.62111	0.054224	20.69096	0.0561169	87.59255	0.159423	20.32076	1.001078	0.4473065	0.0003914	0.0189367	0.0000383	0.0002744	2.72E-06	0.0016131	0.000046	0.0001863	1.61E-06	0.0975202	0.000032	0.0039537	0.0000439
22003-01J	10-TRS-02	Tarosero	60C	20/02/2013	plag	35	2.334026	0.0093339	0.0117054	0.0000628	1.90E-07	1.000000	1.72E-14	3.93E-13	0.0075413	0.0000538	0.3117235	0.0867587	0.0021368	0.1700471	0.004188	0.0016587	1.24E-07	0.0141975	0.000145	22.86272	0.065433	20.6184	0.0825078	90.18068	0.1337907	23.83292	1.001135	0.9242832	0.0007819	0.0404275	0.000036	0.000574	5.62E-06	0.0035074	0.000086	0.0003049	2.14E-06	0.1993821	0.000042	0.0084461	0.000022
21995-01A	10-TRS-03	Tarosero	60b	10/02/2013	matrix	3	2.677135	1.65172	1.651727	0.000063	1.18E-07	1.003247	2.47E-17	6.97E-15	0.8652815	0.122449	0.0236811	0.7536696	0.5023572	1.477192	0.9846201	0.1213784	0.0000286	0.2179947	0.0347277	281.8765	39.17791	23.56791	14.55155	8.356619	5.031666	19.50685	1.001064	0.0164235	0.0005249	0.0000583	7.80E-06	0.0000127	1.06E-06	0.0000439	0.0000286	0.0000504	2.11E-06	0.0034141	0.0000233	-0.000266	0.0000497
21995-01B	10-TRS-03	Tarosero	60b	10/02/2013	matrix	5	1.318257	0.1819905	0.1820073	0.000063	1.18E-07	1.003265	3.47E-16	4.95E-14	0.4388047	0.0088258	0.0025916	0.0421404	0.0351013	0.0825952	0.0687985	-0.0017861	2.00E-06	0.0947358	0.0031367	142.6292	2.614693	11.60078	1.602119	8.133322	1.069207	19.51883	1.001064	0.1165683	0.0006329	0.0008173	0.0000141	0.0000774	2.16E-06	0.0000344	0.0000286	0.0003586	3.57E-06	0.0258605	0.0000883	-0.0000628	0.0000474
21995-01C	10-TRS-03	Tarosero	60b	10/02/2013	matrix	7	2.02608	0.1997182	0.1997544	0.000063	1.18E-07	1.003300	4.39E-16	4.70E-14	0.2984494	0.0097786	0.0030751	0.034073	0.0262541	0.0667831	0.0514581	0.0265214	1.49E-06	0.0779	0.0034223	106.9507	3.444798	17.83319	1.758871	16.67393	1.547223	19.54341	1.001064	0.110647	0.0012172	0.0010346	0.0000309	0.0000806	2.55E-06	0.0000353	0.0000271	0.0003088	3.92E-06	0.0264554	0.0001909	0.0002455	0.0000542
21995-01D	10-TRS-03	Tarosero	60b	10/02/2013	matrix	9	2.049889	0.1131159	0.1131813	0.000063	1.18E-07	1.003320	7.26E-16	4.85E-14	0.1631671	0.0044365	0.0097554	0.0588524	0.0187817	0.1153507	0.0368122	0.0162488	1.07E-06	0.0487208	0.0017983	66.76139	1.670154	18.04287	0.996198	27.02507	1.34168	19.55697	1.001065	0.1142035	0.0009717	0.0017106	0.0000397	0.0000833	2.36E-06	0.0001007	0.0000319	0.0002791	3.83E-06	0.0283004	0.0002208	0.0004266	0.0000483
21995-01E	10-TRS-03	Tarosero	60b	10/02/2013	matrix	12	2.365943	0.0503054	0.0505009	0.000063	1.18E-07	1.003338	1.82E-15	7.18E-14	0.0619705	0.0010558	0.0049983	0.0117198	0.0070757	0.0229707	0.0138683	0.0164371	4.02E-07	0.0296109	0.0007415	39.33119	0.460528	20.82656	0.4431114	52.95228	1.066293	19.56965	1.001065	0.1690041	0.0012174	0.0042969	0.0000388	0.0001272	2.95E-06	0.0000504	0.0000303	0.0002663	3.83E-06	0.0431754	0.0003405	0.001196	0.0000474
21995-01F	10-TRS-03	Tarosero	60b	11/02/2013	matrix	17	2.333993	0.0188735	0.0193749	0.000063	1.18E-07	1.003395	8.84E-15	2.21E-13	0.0148433	0.000169	0.0228565	0.012805	0.0014663	0.0250978	0.0028739	0.002734	8.34E-08	0.0159551	0.000243	24.97701	0.1787344	20.54514	0.1662427	82.25777	0.5472772	19.60854	1.001066	0.519859	0.0020672	0.0208135	0.0001204	0.0003321	4.63E-06	0.0002665	0.0000304	0.0003089	3.02E-06	0.1193463	0.0004503	0.0047062	0.0000486
21995-01G	10-TRS-03	Tarosero	60b	11/02/2013	matrix	25	2.348934	0.0080637	0.0091895	0.000063	1.18E-07	1.003414	1.51E-14	3.59E-13	0.0107227	0.0000907	0.0327338	0.0132362	0.0011045	0.0259429	0.0021648	0.0035942	6.28E-08	0.0154708	0.0001559	23.8781	0.0680033	20.67674	0.071028	86.59466	0.2207835	19.622	1.001066	0.8463826	0.0012181	0.035446	0.0000794	0.0005484	5.33E-06	0.0004692	0.000039	0.0003801	3.09E-06	0.1879823	0.0003204	0.0079328	0.0000486
21995-01H	10-TRS-03	Tarosero	60b	11/02/2013	matrix	35	2.335527	0.0105751	0.0114471	0.000063	1.18E-07	1.003433	7.87E-15	2.12E-13	0.0211611	0.0001731	0.0250514	0.0198215	0.0020175	0.0388501	0.0039544	0.0025589	1.15E-07	0.0170916	0.0002828	26.87639	0.0859085	20.55865	0.0931487	76.49426	0.2448035	19.63467	1.001066	0.4983086	0.000647	0.0185408	0.0000506	0.0003169	5.13E-06	0.0003675	0.0000373	0.0003923	3.02E-06	0.1088583	0.0001112	0.0042134	0.0000458
21995-01I	10-TRS-03	Tarosero	60b	20/02/2013	matrix	35	2.234452	0.0318276	0.0321026	0.000063	1.18E-07	1.003658	9.60E-15	4.46E-13	0.0896855	0.000335	0.0250677	0.0829868	0.0029065	0.1626541	0.0056967	0.0022746	1.66E-07	0.0299764	0.0002632	46.44219	0.1686419	19.66838	0.2803306	42.34839	0.2554901	23.78182	1.001135	1.049826	0.0019042	0.022605	0.0000541	0.0006776	5.52E-06	0.0018759	0.0000653	0.0020273	5.61E-06	0.2274383	0.0000847	0.0048114	0.000022
21994-01A	10-TRS-03	Tarosero	60b	10/02/2013	plag	3	2.570886	1.277309	1.27732	0.0000629	1.29E-07	1.002848	3.35E-17	1.51E-14	1.430527	0.1600364	0.0030628	0.1614157	0.2897663	0.3163748	0.5679419	0.0129568	0.0000165	0.2877459	0.0346951	449.8261	50.00087	22.67147	11.27203	5.039482	2.4239	19.2347	1.001059	0.0354502	0.0005345	0.0000788	8.60E-06	0.0000227	1.11E-06	0.0000127	0.0000227	0.0001127	2.23E-06	0.0078145	0.0000248	-0.0000194	0.0000262
21994-01B	10-TRS-03	Tarosero	60b	10/02/2013	plag	5	3.087552	0.4402369	0.4402821	0.0000629	1.29E-07	1.002871	1.00E-16	2.10E-14	0.6121338	0.0256383	0.0062436	0.1408442	0.1039474	0.2760547	0.203737	0.0358612	5.91E-06	0.1405595	0.0075252	210.0075	8.458387	27.23161	3.886128	12.96572	1.761646	19.2499	1.001059	0.0494828	0.0005321	0.0002356	9.06E-06	0.0000331	1.22E-06	0.0000332	0.0000244	0.0001442	2.28E-06	0.0109162	0.0000403	-0.0001031	0.000027
21994-01C	10-TRS-03	Tarosero	60b	10/02/2013	plag	7	2.738972	0.1275595	0.1276822	0.0000629	1.29E-07	1.002893	3.45E-16	2.17E-14	0.1299011	0.0032953	0.0165801	0.079515	0.0288997	0.1558494	0.0566434	0.0090565	1.64E-06	0.0399359	0.0016048	62.93754	1.113181	24.15486	1.125795	38.37737	1.73887	19.26516	1.001059	0.0511628	0.0005443	0.0008129	0.0000113	0.0000325	1.22E-06	0.0000646	0.0000234	0.0001056	2.23E-06	0.010811	0.0000506	0.0000731	0.0000262
21994-01D	10-TRS-03	Tarosero	60b	10/02/2013	plag	9	2.415983	0.0394243	0.0397322	0.0000629	1.29E-07	1.002940	1.10E-15	3.49E-14	0.03497	0.000854	0.0326304	0.0422837	0.0094471	0.0828761	0.0185163	-0.0006945	5.37E-07	0.0185856	0.0005539	31.74359	0.277104	21.30453	0.3478825	67.11391	1.097056	19.29721	1.00106	0.0822612	0.0005227	0.0025914	0.000015	0.0000482	1.40E-06	0.0001096	0.0000244	0.0000906	2.15E-06	0.0176053	0.00002	0.0005825	0.0000374
21994-01E	10-TRS-03	Tarosero	60b	10/02/2013	plag	12	2.291877	0.0169533	0.0175884	0.0000629	1.29E-07	1.002964	2.82E-15	6.81E-14	0.0130925	0.0003312	0.0510808	0.0249193	0.0036399	0.0488419	0.0071343	0.001123	2.07E-07	0.0150673	0.0002747	24.11735	0.1212233	20.20945	0.1495865	83.79728	0.5934949	19.31302	1.00106	0.1603511	0.0005286	0.0066488	0.0000242	0.0001002	1.78E-06	0.0001657	0.0000241	0.000087	2.18E-06	0.0355013	0.0000184	0.0013638	0.0000304
21994-01F	10-TRS-03	Tarosero	60b	10/02/2013	plag	17	2.291139	0.0103992	0.0114047	0.0000629	1.29E-07	1.002987	5.71E-15	1.41E-13	0.015081	0.0001778	0.0382487	0.021539	0.0018861	0.0422164	0.0036968	0.0014904	1.07E-07	0.0155709	0.0002097	24.70496	0.0806412	20.20294	0.0917569	81.77795	0.3210867	19.32886	1.00106	0.3323936	0.0006209	0.0134545	0.0000339	0.0002095	2.75E-06	0.0002898	0.0000253	0.0002029	2.34E-06	0.0724153	0.0000233	0.0029247	0.0000342
21994-01G	10-TRS-03	Tarosero	60b	10/02/2013	plag	25	2.30748	0.0076122	0.0089545	0.0000629	1.29E-07	1.003062	9.86E-15	2.78E-13	0.0263453	0.0001303	0.0241198	0.0236938	0.0013681	0.0464399	0.0026815	0.0013354	7.78E-08	0.0176519	0.0001638	28.21255	0.0493379	20.34712	0.0671662	72.12142	0.1834477	19.38004	1.001061	0.6549182	0.0006616	0.0232137	0.0000271	0.0004098	3.74E-06	0.00055	0.0000317	0.0006116	2.93E-06	0.1437603	0.0000283	0.0049553	0.0000291
21994-01H	10-TRS-03	Tarosero	60b	10/02/2013	plag	35	2.305268	0.0102004	0.0112358	0.0000629	1.29E-07	1.003085	7.23E-15	2.32E-13	0.0392907	0.0001872	0.0157832	0.0231309	0.0017701	0.0453367	0.0034694	0.0025074	1.01E-07	0.0205093	0.0002111	32.05871	0.0615754	20.32761	0.0900039	63.4078	0.2291181	19.39593	1.001062	0.5456127	0.0007072	0.0170192	0.0000195	0.0003491	3.54E-06	0.0003937	0.00003	0.0006687	3.09E-06	0.1177714	0.0000335	0.00363	0.0000283
21994-01I	10-TRS-03	Tarosero	60b	10/02/2013	plag	45	2.276114	0.0126026	0.0134336	0.0000629	1.29E-07	1.000000	7.04E-15	2.41E-13	0.0472084	0.0002396	0.0122668	0.0216222	0.0018254	0.0423796	0.0035777	0.0016177	1.04E-07	0.0217029	0.0002752	34.16593	0.1027373	20.07037	0.1111972	58.74413	0.2315797	19.49416	1.001063	0.5667504	0.0007078	0.0165882	0.0000427	0.00036	4.43E-06	0.0003587	0.0000302	0.0007831	3.41E-06	0.123573	0.0000283	0.0033886	0.0000524
21994-01J	10-TRS-03	Tarosero	60b	20/02/2013	plag	35	2.257905	0.0197936	0.0203243	0.0000629	1.29E-07	1.000000	1.18E-14	4.32E-13	0.0560573	0.0002076	0.0099106	0.020757	0.0014233	0.0406837	0.0027897	0.0012068	8.10E-08	0.0232382	0.0002059	36.64772	0.1152831	19.9097	0.1746445	54.32751	0.1496467	23.76563	1.001134	1.016755	0.0007407	0.027744	0.0000671	0.0006447	5.32E-06	0.0005759	0.0000393	0.0015553	4.22E-06	0.2230397	0.0000434	0.0059769	0.000022
22005-01A	10-TRS-05	Tarosero	60C	13/02/2013	matrix	3	2.24936	0.3201533	0.3202842	0.0000626	2.55E-07	1.00578	8.62E-17	2.86E-14	1.045931	0.0386264	0.0029874	0.1152078	0.1361876	0.2258073	0.2669276	0.0041795	7.74E-06	0.2118402	0.010151	332.2432	12.02447	19.92809	2.83815	5.997564	0.8154289	20.52854	1.001082	0.0674497	0.0002074	0.000203	7.19E-06	0.000043	1.34E-06	0.0000234	0.0000275	0.0002123	1.70E-06	0.0146181	0.0000186	-0.0000365	0.0000354
22005-01B	10-TRS-05	Tarosero	60C	13/02/2013	matrix	5	3.229589	0.1958143	0.1962549	0.0000626	2.55E-07	1.00577	2.39E-16	1.20E-13	1.582499	0.0174299	0.0017748	0.1035917	0.0526262	0.2030398	0.1031473	0.0505623	2.99E-06	0.3295143	0.0055651	501.1604	5.30006	28.62015	1.736832	5.710366	0.3159272	20.5635	1.001083	0.282512	0.0002436	0.0005637	5.84E-06	0.0001858	2.42E-06	0.0000584	0.0000295	0.0008921	2.87E-06	0.0608326	0.0000314	-0.0000702	0.000035
22005-01C	10-TRS-05	Tarosero	60C	13/02/2013	matrix	7	3.06864	0.1076448	0.1083669	0.0000626	2.55E-07	1.00576	5.23E-16	1.63E-13	0.9544374	0.0061736	0.0011983	0.04238	0.0232287	0.0830648	0.0455283	0.0192279	1.32E-06	0.1996943	0.0025216	312.1936	1.86002	27.19263	0.9547017	8.70994	0.2752856	20.58108	1.001083	0.3846501	0.0004121	0.0012321	7.08E-06	0.000246	2.72E-06	0.0000522	0.0000285	0.001176	3.25E-06	0.0830238	0.0000689	0.000141	0.0000358
22005-01D	10-TRS-05	Tarosero	60C	13/02/2013	matrix	9	2.800343	0.0559878	0.0571362	0.0000626	2.55E-07	1.00575	1.12E-15	1.85E-13	0.4685148	0.0021918	0.0022493	0.0390754	0.0114947	0.0765877	0.0225296	0.0146167	6.53E-07	0.1060221	0.0012546	164.7134	0.6111938	24.81328	0.4964823	15.06417	0.2738565	20.59872	1.001083	0.4346055	0.000404	0.0026386	9.26E-06	0.0002797	3.12E-06	0.0001031	0.0000302	0.0012362	3.73E-06	0.0950825	0.0001112	0.0005698	0.0000391
22005-01E	10-TRS-05	Tarosero	60C	13/02/2013	matrix	12	2.722966	0.0234857	0.0259695	0.0000626	2.55E-07	1.00569	2.84E-15	2.40E-13	0.2013407	0.0006974	0.0031403	0.0235771	0.0036934	0.046211	0.007239	0.0069484	2.10E-07	0.0527491	0.0005469	84.2479	0.1784784	24.12714	0.2082548	28.63803	0.2236294	20.74535	1.001086	0.5639885	0.0004666	0.0066944	0.0000126	0.0003531	3.56E-06	0.0001578	0.0000246	0.0013479	3.88E-06	0.1222351	0.0001414	0.0012262	0.0000467
22005-01F	10-TRS-05	Tarosero	60C	13/02/2013	matrix	17	2.494286	0.0092713	0.0137492	0.0000626	2.55E-07	1.00568	7.30E-15	2.87E-13	0.0577492	0.0002164	0.0062775	0.01366	0.0014607	0.0267736	0.0028629	0.002282	8.30E-08	0.0239298	0.0002225	39.3434	0.0653076	22.0995	0.0822009	56.17124	0.1914137	20.76408	1.001086	0.6764481	0.0006581	0.0171934	0.0000219	0.0004114	3.74E-06	0.0002349	0.000025	0.0009929	3.49E-06	0.1476021	0.0002209	0.0035167	0.0000391
22005-01G	10-TRS-05	Tarosero	60C	13/02/2013	matrix	25	2.350264	0.005684	0.0111283	0.0000626	2.55E-07	1.00567	1.20E-14	2.89E-13	0.0111364	0.0000774	0.0964816	0.039834	0.0013522	0.0780746	0.0026503	0.0023201	7.69E-08	0.0151088	0.0001528	24.14496	0.0469299	20.82262	0.0503915	86.24013	0.2130314	20.78199	1.001086	0.6805991	0.0009719	0.028188	0.0000346	0.0004259	4.22E-06	0.0011228	0.0000379	0.0003139	2.15E-06	0.1475081	0.0002508	0.0057077	0.0000446
22005-01H	10-TRS-05	Tarosero	60C	14/02/2013	matrix	35	2.354088	0.0073774	0.0120935	0.0000626	2.55E-07	1.00565	5.23E-15	1.27E-13	0.01154	0.0001102	0.1635236	0.0697093	0.0024656	0.1366302	0.0048325	0.0019241	1.40E-07	0.0150475	0.0002146	24.29652	0.0589243	20.85653	0.0654038	85.83985	0.2875308	20.81707	1.001087	0.2989735	0.0005697	0.0123052	0.0000171	0.0001852	2.60E-06	0.0008578	0.0000301	0.000142	1.34E-06	0.0637799	0.000035	0.0026452	0.0000438
22005-01I	10-TRS-05	Tarosero	60C	14/02/2013	matrix	45	2.355865	0.0099386	0.013811	0.0000626	2.55E-07	1.00565	4.36E-15	1.22E-13	0.0235068	0.0001689	0.0907351	0.0787473	0.0031411	0.1543446	0.0061566	0.0023651	1.79E-07	0.0174669	0.0002694	27.88483	0.0906362	20.87228	0.0881105	74.84945	0.2545849	20.83492	1.001087	0.286272	0.0004356	0.0102662	0.0000286	0.0001793	2.69E-06	0.0008084	0.000032	0.0002413	1.59E-06	0.0612869	0.0000443	0.002348	0.0000468
22005-01J	10-TRS-05	Tarosero	60C	21/02/2013	matrix	10	2.363772	0.0231778	0.0250957	0.0000626	2.55E-07	1.00000	6.17E-16	1.78E-14	0.026669	0.0005782	0.2148084	0.2109471	0.018242	0.4134563	0.0357544	-0.0000388	1.04E-06	0.0172318	0.000914	28.88647	0.1475281	20.94238	0.2054832	72.4898	0.6129203	23.96361	1.001137	0.0419387	0.0000639	0.0014518	6.91E-06	0.000025	1.31E-06	0.0003063	0.0000264	0.0000387	8.19E-07	0.0092409	0.0000192	0.0003057	0.000029
22005-01K	10-TRS-05	Tarosero	60C	21/02/2013	matrix	15	2.361959	0.0170429	0.0195679	0.0000626	2.55E-07	1.00000	2.21E-15	6.79E-14	0.0330137	0.0003557	0.092559	0.1126745	0.006057	0.2208419	0.0118718	0.0023276	3.44E-07	0.0192541	0.0004587	30.77443	0.1646801	20.92631	0.1510945	67.99512	0.3138953	23.99886	1.001138	0.1598262	0.0001158	0.0051935	0.000027	0.0001	2.31E-06	0.0005852	0.0000312	0.0001715	1.61E-06	0.0352597	0.000018	0.0010997	0.000034
22005-01L	10-TRS-05	Tarosero	60C	21/02/2013	matrix	20	2.368083	0.0101	0.0139618	0.0000626	2.55E-07	1.00000	4.34E-15	1.42E-13	0.0394168	0.0002356	0.0644064	0.0936665	0.0040131	0.1835863	0.0078657	0.0014579	2.28E-07	0.0201684	0.0003082	32.74259	0.062418	20.9806	0.0895417	64.07452	0.2197037	24.01403	1.001138	0.3345254	0.0002129	0.0102168	0.000017	0.0002061	3.11E-06	0.000957	0.0000408	0.0004027	2.31E-06	0.0737808	0.0000206	0.002215	0.000026
22005-01M	10-TRS-05	Tarosero	60C	21/02/2013	matrix	25	2.352277	0.0150203	0.0178128	0.0000626	2.55E-07	1.00000	3.17E-15	1.11E-13	0.0476315	0.0003573	0.049473	0.0869671	0.0042173	0.1704554	0.0082659	0.0023812	2.40E-07	0.0220438	0.0004558	35.05609	0.1495923	20.84047	0.1331624	59.44644	0.2572453	24.03026	1.001138	0.2616186	0.0001151	0.0074629	0.000031	0.0001645	3.30E-06	0.000649	0.0000312	0.0003555	2.21E-06	0.0572857	0.0000224	0.0016556	0.00003
22005-01N	10-TRS-05	Tarosero	60C	21/02/2013	matrix	35	2.396778	0.0164284	0.0191071	0.0000626	2.55E-07	1.00000	2.69E-15	9.93E-14	0.0526847	0.0003884	0.040433	0.0786482	0.0049815	0.1541505	0.0097638	-0.0006981	2.83E-07	0.0219398	0.0004123	36.96034	0.1770353	21.235	0.1456494	57.45135	0.2719792	24.08273	1.001139	0.2338597	0.0002422	0.0063273	0.000029	0.0001388	2.51E-06	0.0004976	0.0000313	0.0003334	1.91E-06	0.050155	0.0000222	0.0013409	0.000028
22022-01A	BD256	Tarosero	60D	09/03/2013	wr	3	3.74686	0.0782178	0.0784888	0.0000625	1.09E-07	1.004214	1.92E-15	3.03E-13	0.4175098	0.0023796	0.0015047	0.0234289	0.0072291	0.0459206	0.0141691	0.021862	4.11E-07	0.0988557	0.0008738	157.918	0.7082273	33.24713	0.6947738	21.05316	0.3959116	33.13103	1.001254	0.7129026	0.0015174	0.0045144	0.0000173	0.0004463	3.50E-06	0.0001058	0.0000325	0.0018848	7.84E-06	0.1531133	0.0002322	0.7129026	0.0015174
22022-01B	BD256	Tarosero	60D	09/03/2013	wr	5	2.361235	0.0079602	0.0089578	0.0000625	1.09E-07	1.004159	9.37E-15	2.36E-13	0.0142173	0.0001632	0.0395741	0.0210171	0.0017383	0.0411936	0.0034071	0.0028999	9.88E-08	0.0158933	0.0001489	25.18811	0.0541131	20.94398	0.0706525	83.15135	0.2608965	33.1527	1.001254	0.5554882	0.0007489	0.0220536	0.0000342	0.0003505	3.20E-06	0.0004635	0.0000382	0.0003135	3.56E-06	0.1238757	0.000105	0.5554882	0.0007489
22022-01C	BD256	Tarosero	60D	09/03/2013	wr	7	2.333232	0.0054517	0.0067971	0.0000625	1.09E-07	1.004104	1.19E-14	2.68E-13	0.0057893	0.0001066	0.0830679	0.0180125	0.0014768	0.0353044	0.0028946	0.0013507	8.39E-08	0.0137621	0.0001442	22.42319	0.0363402	20.69543	0.0483871	92.29648	0.2222423	33.17437	1.001254	0.63084	0.0007864	0.0281334	0.0000243	0.0003872	4.00E-06	0.0005068	0.0000414	0.0001629	2.99E-06	0.1404145	0.0000733	0.63084	0.0007864
22022-01D	BD256	Tarosero	60D	09/03/2013	wr	9	2.336667	0.0059002	0.0071652	0.0000625	1.09E-07	1.003932	1.13E-14	2.50E-13	0.0047328	0.0001069	0.1120683	0.0198321	0.0020569	0.0388709	0.0040314	0.0009606	1.17E-07	0.0134273	0.0001157	22.13802	0.0423017	20.72592	0.0523675	93.62303	0.2251668	33.2423	1.001255	0.5875965	0.0007366	0.0265424	0.0000352	0.0003564	3.00E-06	0.0005264	0.0000544	0.0001256	2.83E-06	0.1303477	0.0000528	0.5875965	0.0007366
22022-01E	BD256	Tarosero	60D	09/03/2013	wr	12	2.337584	0.0052017	0.0066029	0.0000625	1.09E-07	1.003877	1.11E-14	2.50E-13	0.005771	0.0001081	0.2151796	0.0459868	0.0020868	0.0901341	0.0040901	0.000098	1.19E-07	0.0133255	0.000124	22.45366	0.0329198	20.73405	0.0461678	92.3414	0.208573	33.26401	1.001255	0.5878269	0.0006475	0.0261796	0.0000213	0.0003489	3.20E-06	0.0012039	0.0000544	0.0001511	2.83E-06	0.1311113	0.0000474	0.5878269	0.0006475
22022-01F	BD256	Tarosero	60D	09/03/2013	wr	15	2.319964	0.0080026	0.008963	0.0000625	1.09E-07	1.003823	7.70E-15	1.78E-13	0.0085307	0.0001565	0.2353224	0.074136	0.0033781	0.1453066	0.0066211	0.0005987	1.92E-07	0.01402	0.0001526	23.11865	0.0561246	20.57767	0.0710273	89.00697	0.2895305	33.28556	1.001255	0.4192061	0.0006463	0.0181328	0.0000322	0.0002542	2.71E-06	0.0013443	0.000061	0.0001547	2.82E-06	0.0931156	0.0000333	0.4192061	0.0006463
22022-01G	BD256	Tarosero	60D	09/03/2013	wr	17	2.344943	0.0119115	0.0125908	0.0000625	1.09E-07	1.003768	3.98E-15	9.28E-14	0.0085032	0.0002643	0.3145121	0.0986538	0.0047992	0.1933615	0.0094064	0.0005933	2.73E-07	0.0140119	0.0002062	23.32977	0.0712335	20.79937	0.105722	89.15023	0.4935638	33.30725	1.001255	0.2184718	0.0005816	0.0093645	0.0000125	0.0001312	1.91E-06	0.0009238	0.0000448	0.0000796	2.47E-06	0.0486639	0.0000304	0.2184718	0.0005816
22022-01H	BD256	Tarosero	60D	09/03/2013	wr	19	2.340538	0.0171882	0.017664	0.0000625	1.09E-07	1.003658	2.81E-15	6.84E-14	0.0120759	0.000365	0.2545722	0.1133532	0.0077921	0.2221723	0.0152726	0.0016807	4.43E-07	0.0150633	0.0002637	24.35609	0.1123847	20.76027	0.1525558	85.23205	0.6515803	33.3508	1.001256	0.161056	0.0005777	0.0066126	0.0000183	0.0000996	1.71E-06	0.0007496	0.0000513	0.0000799	2.40E-06	0.0363096	0.0000269	0.161056	0.0005777
22022-01I	BD256	Tarosero	60D	09/03/2013	wr	21	2.325639	0.0217174	0.0220912	0.0000625	1.09E-07	1.003603	2.20E-15	5.32E-14	0.0120163	0.0004654	0.363518	0.160926	0.011863	0.315415	0.0232514	0.0009536	6.74E-07	0.0147994	0.0002785	24.20154	0.1395118	20.62803	0.1927541	85.22713	0.8468935	33.37247	1.001256	0.1252835	0.0005902	0.0051767	0.0000163	0.0000766	1.41E-06	0.0008331	0.0000611	0.0000622	2.40E-06	0.028145	0.0000276	0.1252835	0.0005902
22022-01J	BD256	Tarosero	60D	10/03/2013	wr	25	2.324935	0.0241553	0.0244917	0.0000625	1.09E-07	1.003549	2.11E-15	5.96E-14	0.0257112	0.0005569	0.2157797	0.2043009	0.0097412	0.4004297	0.0190928	0.0015433	5.54E-07	0.0175961	0.0003305	28.28055	0.1471508	20.62178	0.2143918	72.90984	0.7854708	33.39406	1.001256	0.1404364	0.0005923	0.0049658	0.0000144	0.0000874	1.61E-06	0.0010145	0.0000481	0.0001277	2.74E-06	0.0316473	0.0000298	0.1404364	0.0005923
22022-01K	BD256	Tarosero	60D	10/03/2013	wr	30	2.322265	0.0383783	0.0385904	0.0000625	1.09E-07	1.003310	1.31E-15	3.17E-14	0.0122734	0.0007471	0.542812	0.2452645	0.0137871	0.4807183	0.0270227	0.0006146	7.84E-07	0.0147278	0.0004165	24.24028	0.2814036	20.59809	0.3406281	84.9623	1.36321	33.48902	1.001257	0.0745614	0.0005717	0.0030759	0.0000262	0.0000453	1.21E-06	0.0007544	0.0000418	0.0000378	2.28E-06	0.0166203	0.0000256	0.0745614	0.0005717
22022-01L	BD256	Tarosero	60D	10/03/2013	wr	35	2.326938	0.0464763	0.0466523	0.0000625	1.09E-07	1.003255	9.28E-16	2.29E-14	0.0136317	0.0009944	0.5038672	0.2528535	0.0192381	0.4955928	0.0377067	0.0043608	1.09E-06	0.0162767	0.00052	24.68663	0.2956416	20.63957	0.4125035	83.59364	1.836628	33.51075	1.001258	0.0539392	0.0005711	0.002185	0.0000115	0.0000356	1.11E-06	0.0005525	0.0000418	0.0000298	2.17E-06	0.0119017	0.0000248	0.0539392	0.0005711
22016-01A	BD256	Tarosero	60D	25/02/2013	plag	3	2.432227	0.052539	0.0528848	0.0000626	1.56E-07	1.003601	1.19E-15	1.15E-13	0.2509674	0.0015498	0.0127493	0.1179669	0.0170613	0.2312152	0.0334401	0.000122	9.70E-07	0.0597956	0.0010671	96.48207	0.4089999	21.55134	0.4658489	22.33544	0.45113	25.96499	1.001166	0.2713294	0.0005909	0.0028122	9.98E-06	0.0001682	2.92E-06	0.0003317	0.0000478	0.0007058	3.55E-06	0.0604216	0.000032	0.2713294	0.0005909
22016-01B	BD256	Tarosero	60D	25/02/2013	plag	5	2.334476	0.0166798	0.0176578	0.0000626	1.56E-07	1.003578	3.66E-15	1.31E-13	0.050526	0.0003793	0.0605453	0.1127993	0.0066642	0.2210867	0.0130618	0.0034128	3.79E-07	0.0229469	0.0004162	35.76213	0.1401412	20.68464	0.1478868	57.83601	0.368246	25.9812	1.001166	0.3079385	0.0006177	0.0086107	0.0000282	0.0001976	3.50E-06	0.0009713	0.0000571	0.0004351	2.93E-06	0.0687537	0.0000302	0.3079385	0.0006177
22016-01C	BD256	Tarosero	60D	25/02/2013	plag	7	2.33092	0.0124947	0.0137696	0.0000626	1.56E-07	1.003554	4.89E-15	1.32E-13	0.0215754	0.0002411	0.1340894	0.1066934	0.0045853	0.209119	0.0089873	-0.0004461	2.61E-07	0.0161304	0.0003357	27.08623	0.1013282	20.65311	0.1107811	76.24567	0.3493107	25.99748	1.001167	0.3117045	0.0005869	0.0115079	0.0000362	0.0001856	3.79E-06	0.0012278	0.0000524	0.0002483	2.66E-06	0.0696766	0.0000314	0.3117045	0.0005869
22016-01D	BD256	Tarosero	60D	25/02/2013	plag	9	2.336083	0.0120132	0.0133397	0.0000626	1.56E-07	1.003506	5.62E-15	1.52E-13	0.0214215	0.0002226	0.1319459	0.1042465	0.0060062	0.2043232	0.0117721	0.0023721	3.41E-07	0.0170731	0.000272	27.08629	0.1016128	20.69889	0.1065123	76.41466	0.3170936	26.03052	1.001167	0.3586415	0.0006083	0.0132407	0.0000432	0.0002261	3.50E-06	0.0013803	0.0000791	0.0002836	2.80E-06	0.0806482	0.0000427	0.3586415	0.0006083
22016-01E	BD256	Tarosero	60D	25/02/2013	plag	12	2.326261	0.0110473	0.0124656	0.0000626	1.56E-07	1.003482	7.41E-15	2.74E-13	0.0550556	0.0002562	0.0521226	0.1058334	0.0038492	0.2074335	0.0075444	0.001142	2.19E-07	0.0230225	0.0002827	37.04253	0.0619677	20.6118	0.0979475	55.64049	0.2342328	26.04683	1.001167	0.645972	0.0006841	0.0174387	0.0000203	0.0004015	4.87E-06	0.0018456	0.0000669	0.0009601	4.32E-06	0.1455429	0.0000427	0.645972	0.0006841
22016-01F	BD256	Tarosero	60D	25/02/2013	plag	17	2.320546	0.0086703	0.0104096	0.0000626	1.56E-07	1.003458	9.18E-15	2.96E-13	0.0393655	0.0001869	0.0730423	0.1060432	0.0034514	0.2078447	0.0067648	0.0025824	1.96E-07	0.0205459	0.0002014	32.30662	0.0555153	20.56113	0.0768726	63.6403	0.2060478	26.06323	1.001168	0.6980616	0.0007094	0.0216074	0.0000272	0.0004439	4.28E-06	0.0022913	0.0000743	0.0008506	3.89E-06	0.1569724	0.0000444	0.6980616	0.0007094
22016-01G	BD256	Tarosero	60D	25/02/2013	plag	20	2.319283	0.011401	0.0127723	0.0000626	1.56E-07	1.003381	6.58E-15	2.19E-13	0.0424606	0.000241	0.0660922	0.1035052	0.003727	0.2028701	0.007305	0.0013557	2.12E-07	0.0207095	0.000241	33.21989	0.102675	20.54994	0.1010831	61.8571	0.2317088	26.11613	1.001168	0.514801	0.0005869	0.0154968	0.0000432	0.0003209	3.59E-06	0.001604	0.0000574	0.000658	3.24E-06	0.1159746	0.0000269	0.514801	0.0005869
22016-01H	BD256	Tarosero	60D	25/02/2013	plag	25	2.327897	0.0197156	0.0205451	0.0000626	1.56E-07	1.003358	4.86E-15	2.43E-13	0.0989107	0.0004058	0.0273449	0.0997696	0.0054639	0.1955485	0.0107093	0.0012318	3.11E-07	0.0313643	0.0003908	50.15319	0.149366	20.62631	0.1748024	41.12428	0.3153638	26.13242	1.001168	0.5733686	0.0012254	0.0114323	0.0000223	0.0003586	4.38E-06	0.0011406	0.0000622	0.0011308	4.06E-06	0.1286435	0.0000457	0.5733686	0.0012254
22016-01I	BD256	Tarosero	60D	25/02/2013	plag	35	2.334139	0.0162858	0.0172859	0.0000626	1.56E-07	1.003334	4.15E-15	1.44E-13	0.0468187	0.0003552	0.0517266	0.0893678	0.0054231	0.1751609	0.0106294	0.0024903	3.08E-07	0.0219272	0.0003308	34.65434	0.1472975	20.68165	0.1443942	59.67725	0.3487621	26.14875	1.001169	0.338789	0.000649	0.0097762	0.0000362	0.0002144	3.11E-06	0.0008737	0.0000527	0.0004577	3.02E-06	0.0759583	0.0000262	0.338789	0.000649
22008-01A	BD261	Tarosero	60C	24/02/2013	matrix	3	3.632117	0.1535484	0.1541525	0.0000629	2.36E-07	1.003948	1.79E-15	4.12E-13	0.6646308	0.0044563	0.0024222	0.0595177	0.0092435	0.1166547	0.0181173	0.0200665	5.25E-07	0.1450645	0.0016946	230.508	1.31504	32.04806	1.356202	13.90269	0.5672283	25.7285	1.001163	0.9704673	0.0034426	0.0042101	0.0000183	0.0006107	6.55E-06	0.0002506	0.0000387	0.0027982	0.0000141	0.2103973	0.0007903	0.9704673	0.0034426
22008-01B	BD261	Tarosero	60C	24/02/2013	matrix	5	2.408299	0.0096774	0.0132448	0.0000629	2.36E-07	1.003870	1.18E-14	3.52E-13	0.0285242	0.0001534	0.0158776	0.0169826	0.0015534	0.0332859	0.0030448	0.0023088	8.83E-08	0.0184008	0.0002171	29.75919	0.0889226	21.24247	0.0854164	71.38204	0.2399063	25.78118	1.001164	0.828172	0.0013159	0.0278291	0.0000682	0.0005121	5.86E-06	0.0004726	0.000043	0.0007938	3.79E-06	0.187252	0.0003313	0.828172	0.0013159
22008-01C	BD261	Tarosero	60C	24/02/2013	matrix	7	2.367813	0.0116593	0.0146625	0.0000629	2.36E-07	1.003847	1.50E-14	3.20E-13	0.0013581	0.0000654	0.2371696	0.0121736	0.0012219	0.0238603	0.0023949	0.0015552	6.95E-08	0.0129931	0.0001678	21.29023	0.1025461	20.88513	0.1029077	98.09967	0.3121564	25.7973	1.001164	0.7541201	0.0015942	0.035421	0.0001502	0.0004602	5.56E-06	0.0004312	0.0000431	0.0000481	2.31E-06	0.166121	0.0001626	0.7541201	0.0015942
22008-01D	BD261	Tarosero	60C	24/02/2013	matrix	9	2.353639	0.0064618	0.0109481	0.0000629	2.36E-07	1.003823	1.08E-14	2.28E-13	0.0012247	0.0000871	0.3953245	0.0181324	0.0020569	0.0355395	0.0040316	0.0017091	1.17E-07	0.0130207	0.0001666	21.12474	0.0508495	20.76003	0.0570329	98.27554	0.315056	25.81355	1.001164	0.5367793	0.0011015	0.02541	0.0000282	0.0003309	4.18E-06	0.0004607	0.0000521	0.0000311	2.21E-06	0.1172139	0.000087	0.5367793	0.0011015
22008-01E	BD261	Tarosero	60C	25/02/2013	matrix	12	2.369265	0.0067048	0.0111401	0.0000629	2.36E-07	1.003799	7.78E-15	1.68E-13	0.0022869	0.000121	0.5109482	0.0432917	0.0031103	0.0848518	0.0060961	0.0008668	1.77E-07	0.0129305	0.0002201	21.57742	0.0473863	20.89794	0.0591785	96.85118	0.2706637	25.82972	1.001164	0.3953242	0.0005993	0.0183212	0.0000272	0.0002369	3.99E-06	0.0007932	0.0000568	0.0000419	2.22E-06	0.0861301	0.0000544	0.3953242	0.0005993
22008-01F	BD261	Tarosero	60C	25/02/2013	matrix	17	2.367793	0.0084695	0.0122793	0.0000629	2.36E-07	1.003751	5.68E-15	1.27E-13	0.0049365	0.000173	0.4134564	0.0753703	0.0042697	0.1477258	0.0083686	0.0016572	2.43E-07	0.0137039	0.0002282	22.35254	0.0549151	20.88495	0.074754	93.43229	0.3488335	25.86261	1.001165	0.2987217	0.0005661	0.0133641	0.0000193	0.0001831	3.01E-06	0.0010073	0.0000568	0.000066	2.31E-06	0.0654352	0.000035	0.2987217	0.0005661
22008-01G	BD261	Tarosero	60C	25/02/2013	matrix	20	2.350907	0.0202089	0.0220528	0.0000629	2.36E-07	1.003727	2.46E-15	5.64E-14	0.0072597	0.0003806	0.2919201	0.0782454	0.0067544	0.153361	0.0132386	0.0002772	3.84E-07	0.0136681	0.0003807	22.89695	0.1445497	20.73592	0.1783666	90.55966	0.7621199	25.87877	1.001165	0.132799	0.0005661	0.0057999	0.0000262	0.0000793	2.16E-06	0.0004538	0.000039	0.0000421	2.20E-06	0.028907	0.000035	0.132799	0.0005661
22008-01H	BD261	Tarosero	60C	25/02/2013	matrix	25	2.352483	0.02515	0.0266562	0.0000629	2.36E-07	1.003704	1.89E-15	4.54E-14	0.0111798	0.0005129	0.257768	0.1062803	0.0088236	0.2083094	0.0172943	0.0010625	5.02E-07	0.0146806	0.0004338	24.07876	0.1716074	20.74982	0.2219772	86.17083	0.9311589	25.89494	1.001165	0.1069989	0.0005492	0.0044437	0.0000213	0.0000652	1.89E-06	0.0004723	0.000039	0.0000497	2.27E-06	0.0236554	0.0000369	0.1069989	0.0005492
22008-01I	BD261	Tarosero	60C	25/02/2013	matrix	35	2.378135	0.0356701	0.0367708	0.0000629	2.36E-07	1.003625	1.31E-15	3.45E-14	0.018291	0.000748	0.1365904	0.0921839	0.0141584	0.1806805	0.0277504	-0.0001921	8.05E-07	0.0155962	0.0006557	26.42997	0.2461498	20.97623	0.3148337	79.36224	1.200682	25.94855	1.001166	0.0812445	0.0005443	0.003074	0.0000193	0.0000479	1.98E-06	0.0002834	0.0000433	0.0000562	2.27E-06	0.0182251	0.0000314	0.0812445	0.0005443
22019-01A	BD270	Tarosero	60D	07/03/2013	wr	3	3.027478	0.0702936	0.0707525	0.0000625	1.66E-07	1.005038	2.41E-15	2.97E-13	0.3218353	0.002743	0.0047609	0.0566643	0.0076237	0.111062	0.0149424	0.0158453	4.33E-07	0.0786493	0.0009073	122.9851	0.8570557	26.88683	0.6247971	21.86111	0.4655717	32.01567	1.001241	0.698585	0.001394	0.0056802	0.0000372	0.0004467	4.16E-06	0.0003219	0.000043	0.0018281	9.74E-06	0.1547426	0.0005404	0.698585	0.001394
22019-01B	BD270	Tarosero	60D	07/03/2013	wr	5	2.353665	0.0105079	0.0122289	0.0000625	1.66E-07	1.005061	9.43E-15	2.98E-13	0.0358463	0.0001909	0.0263859	0.0351053	0.0026626	0.0688064	0.0052187	0.0053006	1.51E-07	0.0208192	0.0001916	31.60025	0.0772833	20.89884	0.0933632	66.13487	0.2982821	32.05764	1.001242	0.7017356	0.0013941	0.0222066	0.0000282	0.0004623	4.16E-06	0.0007796	0.0000588	0.000796	4.11E-06	0.1529334	0.0002907	0.7017356	0.0013941
22019-01C	BD270	Tarosero	60D	07/03/2013	wr	7	2.346979	0.0111875	0.0128089	0.0000625	1.66E-07	1.005072	1.04E-14	2.51E-13	0.0107342	0.0001184	0.0865435	0.0344857	0.0022933	0.0675919	0.0044948	0.0044111	1.30E-07	0.0157538	0.0001462	24.0422	0.099028	20.83943	0.0994013	86.67896	0.4053091	32.07846	1.001242	0.5915485	0.0016774	0.0246046	0.0000702	0.0003876	3.38E-06	0.0008485	0.0000561	0.0002641	2.81E-06	0.1278804	0.0001513	0.5915485	0.0016774
22019-01D	BD270	Tarosero	60D	08/03/2013	wr	9	2.34242	0.01062	0.0123103	0.0000625	1.66E-07	1.005084	9.45E-15	2.20E-13	0.0082355	0.0001218	0.1330313	0.0406105	0.0026655	0.0795966	0.0052243	0.005512	1.52E-07	0.0156597	0.0001719	23.25496	0.0946064	20.79893	0.0943591	89.43883	0.2945825	32.09922	1.001242	0.5172782	0.0009624	0.0222438	0.0000782	0.0003483	3.58E-06	0.0009033	0.0000589	0.0001832	2.63E-06	0.1109559	0.0000873	0.5172782	0.0009624
22019-01E	BD270	Tarosero	60D	08/03/2013	wr	12	2.350692	0.0067672	0.0092102	0.0000625	1.66E-07	1.005118	9.46E-15	2.19E-13	0.0075341	0.0001165	0.3236741	0.0899866	0.003455	0.1763737	0.0067718	0.0048993	1.96E-07	0.0153135	0.0001561	23.11428	0.0516704	20.87242	0.0601268	90.29797	0.2176821	32.16359	1.001243	0.5146508	0.0005976	0.0222655	0.0000402	0.000341	3.38E-06	0.0020036	0.0000764	0.0001678	2.58E-06	0.112743	0.0000389	0.5146508	0.0005976
22019-01F	BD270	Tarosero	60D	08/03/2013	wr	15	2.345105	0.0068312	0.0092473	0.0000625	1.66E-07	1.005129	7.32E-15	1.68E-13	0.0072508	0.0001465	0.4819094	0.1287962	0.00446	0.2524405	0.0087416	0.0036449	2.54E-07	0.0148257	0.0001646	22.97631	0.0420648	20.82279	0.0606952	90.62168	0.2777212	32.18451	1.001243	0.3962828	0.0005874	0.0172475	0.0000154	0.0002557	2.80E-06	0.0022214	0.0000765	0.0001251	2.52E-06	0.0866868	0.0000352	0.3962828	0.0005874
22019-01G	BD270	Tarosero	60D	08/03/2013	wr	17	2.344815	0.0130306	0.0144442	0.0000625	1.66E-07	1.005141	3.84E-15	8.79E-14	0.0070055	0.0002645	0.4376558	0.1130531	0.006271	0.2215841	0.0122912	0.0035314	3.56E-07	0.0147407	0.0002833	22.90201	0.0882818	20.82021	0.1157775	90.90546	0.4970042	32.20543	1.001243	0.2070967	0.0005436	0.0090427	0.0000243	0.0001333	2.51E-06	0.0010223	0.0000563	0.0000633	2.39E-06	0.0448786	0.0000383	0.2070967	0.0005436
22019-01H	BD270	Tarosero	60D	08/03/2013	wr	19	2.353647	0.0153676	0.0165919	0.0000625	1.66E-07	1.005152	2.84E-15	6.54E-14	0.0072432	0.000351	0.5001558	0.133521	0.0089083	0.2617011	0.0174603	0.0011631	5.06E-07	0.0139683	0.0002948	23.04949	0.0883955	20.89868	0.1365419	90.66293	0.6488859	32.2263	1.001244	0.1539604	0.0005223	0.0066796	0.0000103	0.0000933	1.94E-06	0.0008919	0.0000592	0.0000484	2.34E-06	0.0336373	0.0000396	0.1539604	0.0005223
22019-01I	BD270	Tarosero	60D	08/03/2013	wr	21	2.34809	0.0193669	0.0203475	0.0000625	1.66E-07	1.005175	2.20E-15	5.03E-14	0.0068139	0.0004453	0.595583	0.1495325	0.0104282	0.2930837	0.0204393	0.0025978	5.93E-07	0.014381	0.000362	22.87039	0.1102376	20.84931	0.1720754	91.15604	0.829774	32.26841	1.001244	0.1185519	0.000513	0.0051836	9.48E-06	0.0000745	1.85E-06	0.0007751	0.0000538	0.0000353	2.31E-06	0.0261598	0.0000283	0.1185519	0.000513
22019-01J	BD270	Tarosero	60D	08/03/2013	wr	25	2.365593	0.0163978	0.0175618	0.0000625	1.66E-07	1.005186	2.82E-15	6.41E-14	0.0058946	0.0003497	0.7192713	0.1562082	0.008582	0.3061681	0.0168208	0.0021999	4.88E-07	0.0140693	0.0002989	22.75073	0.1042672	21.00482	0.145697	92.31854	0.6656936	32.28951	1.001244	0.1508886	0.0005291	0.0066323	0.0000184	0.0000933	1.94E-06	0.001036	0.0000565	0.0000391	2.32E-06	0.0333666	0.0000255	0.1508886	0.0005291
22019-01K	BD270	Tarosero	60D	08/03/2013	wr	30	2.366849	0.0180715	0.0191351	0.0000625	1.66E-07	1.005197	2.51E-15	5.71E-14	0.005791	0.0003873	0.7226924	0.154196	0.0110684	0.3022241	0.021694	0.0022233	6.29E-07	0.0140578	0.0002885	22.73113	0.1140897	21.01598	0.1605679	92.44736	0.7413056	32.31051	1.001245	0.1344997	0.0005269	0.005917	0.0000174	0.0000832	1.67E-06	0.0009124	0.0000651	0.0000343	2.29E-06	0.0301197	0.000033	0.1344997	0.0005269
22019-01L	BD270	Tarosero	60D	08/03/2013	wr	35	2.384736	0.0243419	0.0251535	0.0000625	1.66E-07	1.005232	1.83E-15	4.18E-14	0.0057092	0.000533	0.618763	0.1302095	0.0119891	0.2552106	0.0234987	0.0018857	6.82E-07	0.0139269	0.0003544	22.86794	0.1495916	21.17491	0.2162832	92.59076	1.008178	32.37579	1.001245	0.0985353	0.0005218	0.0043089	0.0000154	0.00006	1.50E-06	0.0005611	0.0000514	0.0000246	2.29E-06	0.0219475	0.0000262	0.0985353	0.0005218
22020-01A	BD306	Tarosero	60D	07/03/2013	hand mag	3	2.750117	0.0642424	0.0645698	0.0000625	1.48E-07	1.004844	1.93E-15	2.95E-13	0.4302651	0.0019583	0.0021179	0.0338334	0.0105534	0.0663135	0.0206846	0.0048642	6.00E-07	0.0954111	0.0008669	152.8834	0.5227295	24.40455	0.570522	15.96254	0.3263403	31.65891	1.001237	0.6946438	0.0010511	0.0045436	0.0000135	0.0004335	3.67E-06	0.0001537	0.0000477	0.001955	6.67E-06	0.1525471	0.000241	0.6946438	0.0010511
22020-01B	BD306	Tarosero	60D	07/03/2013	hand mag	5	2.356187	0.0115148	0.0127887	0.0000625	1.48E-07	1.004856	7.48E-15	2.61E-13	0.047023	0.0002255	0.0152801	0.0267481	0.0031727	0.0524262	0.0062185	0.0035492	1.80E-07	0.0223336	0.0002403	34.94621	0.0766847	20.90652	0.1022376	59.82494	0.2858361	31.67936	1.001237	0.615293	0.0011215	0.0176069	0.0000184	0.0003932	4.17E-06	0.0004709	0.0000556	0.0008279	3.87E-06	0.1357891	0.0001516	0.615293	0.0011215
22020-01C	BD306	Tarosero	60D	07/03/2013	hand mag	7	2.340809	0.00709	0.0089904	0.0000625	1.48E-07	1.004891	7.91E-15	2.05E-13	0.0172764	0.0001489	0.0559912	0.0358955	0.0030015	0.0703552	0.0058829	0.0039855	1.71E-07	0.0168467	0.0001527	25.92618	0.0446923	20.76999	0.0629504	80.11215	0.2429823	31.74331	1.001238	0.4829466	0.0006451	0.0186278	0.0000174	0.0003138	2.80E-06	0.0006687	0.0000556	0.0003218	2.76E-06	0.1063906	0.0000378	0.4829466	0.0006451
22020-01D	BD306	Tarosero	60D	07/03/2013	hand mag	9	2.33121	0.0095412	0.0110156	0.0000625	1.48E-07	1.004902	5.97E-15	1.51E-13	0.0156426	0.0001943	0.1371331	0.0791965	0.0051959	0.155225	0.010184	0.005881	2.95E-07	0.017189	0.0002042	25.34892	0.0678211	20.68476	0.0847139	81.59783	0.3108476	31.76392	1.001238	0.3562967	0.0005829	0.0140557	0.0000283	0.0002416	2.80E-06	0.0011132	0.0000726	0.0002199	2.69E-06	0.0782377	0.0000286	0.3562967	0.0005829
22020-01E	BD306	Tarosero	60D	07/03/2013	hand mag	12	2.331958	0.0089898	0.0105425	0.0000625	1.48E-07	1.004913	6.69E-15	1.72E-13	0.0170171	0.0001783	0.1929718	0.121061	0.0055883	0.2372795	0.010953	0.0063117	3.18E-07	0.0175963	0.0002076	25.76201	0.0666969	20.6914	0.0798177	80.31279	0.276379	31.78467	1.001239	0.4057575	0.0005876	0.0157502	0.0000322	0.0002771	3.19E-06	0.0019067	0.0000875	0.000268	2.75E-06	0.0892579	0.0000305	0.4057575	0.0005876
22020-01F	BD306	Tarosero	60D	07/03/2013	hand mag	15	2.334601	0.0085326	0.0101588	0.0000625	1.48E-07	1.004924	5.98E-15	1.52E-13	0.0155004	0.0001918	0.2202244	0.1258305	0.0051899	0.2466279	0.0101721	0.0058643	2.95E-07	0.0171544	0.0002224	25.33209	0.0506183	20.71486	0.0757583	81.76818	0.3044273	31.80523	1.001239	0.3567817	0.000559	0.0140842	0.0000154	0.0002416	3.09E-06	0.0017722	0.0000727	0.0002183	2.69E-06	0.0786035	0.0000298	0.3567817	0.000559
22020-01G	BD306	Tarosero	60D	07/03/2013	hand mag	17	2.337576	0.0141124	0.0151537	0.0000625	1.48E-07	1.004947	3.65E-15	9.57E-14	0.0182702	0.000303	0.2055438	0.1383954	0.006204	0.2712551	0.0121598	0.0032056	3.53E-07	0.016762	0.0002538	26.18439	0.0962265	20.74128	0.1253006	79.20672	0.4678233	31.84675	1.001239	0.2253287	0.0005585	0.0086055	0.0000223	0.0001442	2.13E-06	0.001191	0.000053	0.0001572	2.57E-06	0.0493648	0.0000314	0.2253287	0.0005585
22020-01H	BD306	Tarosero	60D	07/03/2013	hand mag	19	2.3325	0.0152541	0.0162182	0.0000625	1.48E-07	1.004958	3.27E-15	8.83E-14	0.0211387	0.0003452	0.2089296	0.1627034	0.0083802	0.3188987	0.0164252	0.002292	4.76E-07	0.0169895	0.0002581	26.99356	0.0971121	20.69621	0.1354367	76.66403	0.5005847	31.86756	1.00124	0.2078785	0.0005352	0.007701	0.0000184	0.0001308	1.94E-06	0.001253	0.0000641	0.0001628	2.63E-06	0.0456634	0.0000291	0.2078785	0.0005352
22020-01I	BD306	Tarosero	60D	07/03/2013	hand mag	21	2.338411	0.0180147	0.0188422	0.0000625	1.48E-07	1.004969	2.64E-15	7.20E-14	0.0217485	0.000402	0.1655972	0.13274	0.0090144	0.2601703	0.0176682	0.0038657	5.12E-07	0.017649	0.0003495	27.23102	0.1185348	20.74869	0.1599483	76.18986	0.5847592	31.88827	1.00124	0.169528	0.0005203	0.0062255	0.0000184	0.0001099	2.13E-06	0.0008264	0.0000558	0.0001354	2.47E-06	0.037395	0.0000276	0.169528	0.0005203
22020-01J	BD306	Tarosero	60D	07/03/2013	hand mag	25	2.336456	0.0210878	0.0217977	0.0000625	1.48E-07	1.005005	2.22E-15	6.22E-14	0.0242064	0.0004782	0.1661805	0.148223	0.0123461	0.2905172	0.0241984	0.0043379	7.02E-07	0.0182769	0.0003621	27.94613	0.1374874	20.73134	0.1872327	74.17728	0.6688492	31.95326	1.001241	0.146369	0.0005108	0.0052375	0.0000174	0.0000957	1.85E-06	0.0007763	0.0000643	0.0001268	2.47E-06	0.0315234	0.0000276	0.146369	0.0005108
22020-01K	BD306	Tarosero	60D	07/03/2013	hand mag	30	2.342379	0.0250465	0.02565	0.0000625	1.48E-07	1.005016	1.85E-15	5.28E-14	0.0262621	0.0005753	0.140297	0.1357914	0.0116877	0.2661511	0.0229079	0.0017754	6.64E-07	0.0177834	0.0003927	28.61375	0.1592653	20.78392	0.2223815	72.63093	0.7871623	31.97417	1.001241	0.1244357	0.0005152	0.0043488	0.0000154	0.0000773	1.67E-06	0.0005905	0.0000505	0.0001142	2.47E-06	0.0269696	0.0000269	0.1244357	0.0005152
22020-01L	BD306	Tarosero	60D	07/03/2013	hand mag	35	2.34013	0.0303459	0.030845	0.0000625	1.48E-07	1.005027	1.53E-15	4.71E-14	0.0333615	0.000699	0.1110263	0.1365083	0.0155917	0.2675563	0.0305598	0.0018567	8.86E-07	0.0191567	0.0004742	30.71365	0.1999249	20.76396	0.2694338	67.59998	0.8823334	31.99496	1.001241	0.1108308	0.0005252	0.0036085	0.0000154	0.0000691	1.67E-06	0.0004926	0.0000559	0.0001204	2.47E-06	0.0238501	0.000029	0.1108308	0.0005252
22021-01A	BD306	Tarosero	60D	09/03/2013	Not mag	3	1.190372	0.1786271	0.1786498	0.0000626	1.50E-07	1.005425	1.42E-15	3.87E-13	0.877286	0.0097016	0.0013017	0.0423164	0.013528	0.0829402	0.0265148	-0.0074669	7.69E-07	0.175869	0.0023477	272.511	2.826149	10.54766	1.583303	3.870438	0.4855688	32.73922	1.001249	0.9115797	0.001972	0.0033451	0.0000332	0.0005883	5.06E-06	0.0001416	0.000045	0.0029346	0.0000132	0.202248	0.0005805	0.9115797	0.001972
22021-01B	BD306	Tarosero	60D	09/03/2013	Not mag	5	2.307336	0.0171719	0.0180357	0.0000626	1.50E-07	1.005042	6.33E-15	2.80E-13	0.079918	0.0003666	0.0181616	0.0536936	0.0035673	0.1052395	0.0069919	0.0035537	2.03E-07	0.0285677	0.0002575	44.31111	0.1158469	20.4512	0.1523013	46.15263	0.2691379	32.80653	1.00125	0.6600014	0.0009117	0.0148947	0.0000303	0.0004255	3.68E-06	0.0007998	0.0000528	0.0011904	4.87E-06	0.148521	0.0002508	0.6600014	0.0009117
22021-01C	BD306	Tarosero	60D	09/03/2013	Not mag	7	2.322193	0.0096063	0.0110944	0.0000626	1.50E-07	1.004987	7.54E-15	2.03E-13	0.0211814	0.0001797	0.0572041	0.0448785	0.0034644	0.0879618	0.0067902	0.0032627	1.97E-07	0.0173371	0.0001853	26.90438	0.0694993	20.58297	0.0852012	76.50373	0.2768293	32.82803	1.00125	0.4774046	0.0007384	0.0177445	0.0000332	0.0003076	3.19E-06	0.0007963	0.0000611	0.0003759	3.11E-06	0.105718	0.0001118	0.4774046	0.0007384
22021-01D	BD306	Tarosero	60D	09/03/2013	Not mag	9	2.335694	0.0090737	0.0106534	0.0000626	1.50E-07	1.004932	5.97E-15	1.46E-13	0.0126749	0.0001916	0.1135411	0.0532409	0.003981	0.1043522	0.0078028	0.004569	2.26E-07	0.0161753	0.0001822	24.48319	0.0548775	20.70271	0.0804775	84.55812	0.3375355	32.84946	1.00125	0.3442932	0.0006343	0.0140624	0.0000135	0.0002275	2.52E-06	0.0007487	0.0000557	0.0001782	2.69E-06	0.0750326	0.0000361	0.3442932	0.0006343
22021-01E	BD306	Tarosero	60D	09/03/2013	Not mag	12	2.329815	0.0080274	0.0097697	0.0000626	1.50E-07	1.004878	6.80E-15	1.65E-13	0.0122961	0.0001754	0.1645683	0.074727	0.0040271	0.1464648	0.0078931	0.0045113	2.29E-07	0.0160827	0.0001903	24.31586	0.0464576	20.65057	0.0711976	84.92428	0.2881622	32.87079	1.001251	0.3894281	0.0005633	0.0160154	0.0000155	0.0002576	3.00E-06	0.0011968	0.0000642	0.0001969	2.80E-06	0.0848504	0.0000276	0.3894281	0.0005633
22021-01F	BD306	Tarosero	60D	09/03/2013	Not mag	15	2.342922	0.008496	0.0101754	0.0000626	1.50E-07	1.004768	6.47E-15	1.60E-13	0.0131766	0.0001659	0.1452402	0.0706911	0.0035528	0.1385546	0.0069634	0.0033245	2.02E-07	0.0158405	0.0001868	24.69543	0.0551643	20.76682	0.0753545	84.08995	0.3201959	32.9137	1.001251	0.376083	0.0007114	0.0152289	0.0000135	0.0002412	2.81E-06	0.0010765	0.0000538	0.0002007	2.52E-06	0.0827578	0.0000284	0.376083	0.0007114
22021-01G	BD306	Tarosero	60D	09/03/2013	Not mag	17	2.336936	0.0127593	0.0139283	0.0000626	1.50E-07	1.004713	3.93E-15	1.01E-13	0.0164999	0.0002603	0.0946158	0.0577273	0.0044636	0.1131454	0.0087487	0.0033179	2.54E-07	0.0164685	0.0002205	25.63596	0.0825224	20.71373	0.1131672	80.79842	0.4712444	32.93515	1.001251	0.2370741	0.0006595	0.0092477	0.0000125	0.0001523	2.01E-06	0.0005338	0.0000411	0.0001526	2.40E-06	0.0522703	0.0000262	0.2370741	0.0006595
22021-01H	BD306	Tarosero	60D	09/03/2013	Not mag	19	2.33509	0.0154331	0.0164112	0.0000626	1.50E-07	1.004658	3.10E-15	8.07E-14	0.0179002	0.0003214	0.086811	0.057462	0.0060983	0.1126254	0.0119526	0.0011525	3.47E-07	0.0159872	0.0002516	26.03776	0.098898	20.69735	0.1368815	79.48868	0.564483	32.95654	1.001252	0.1899845	0.0006304	0.0072965	0.0000115	0.0001167	1.81E-06	0.0004193	0.0000443	0.0001306	2.34E-06	0.0422701	0.0000308	0.1899845	0.0006304
22021-01I	BD306	Tarosero	60D	09/03/2013	Not mag	21	2.335037	0.0180158	0.0188604	0.0000626	1.50E-07	1.004488	2.56E-15	6.77E-14	0.0193384	0.0003849	0.0627974	0.0449791	0.0063445	0.088159	0.0124353	0.0029007	3.61E-07	0.016863	0.0003211	26.46794	0.1126964	20.69689	0.1597885	78.19566	0.6535632	33.02325	1.001252	0.1593392	0.0006078	0.0060201	9.73E-06	0.0001015	1.91E-06	0.0002708	0.000038	0.0001164	2.31E-06	0.0356269	0.0000291	0.1593392	0.0006078
22021-01J	BD306	Tarosero	60D	09/03/2013	Not mag	25	2.32529	0.0176047	0.0184611	0.0000626	1.50E-07	1.004434	2.84E-15	7.47E-14	0.018991	0.0003644	0.103788	0.0727966	0.0071506	0.1426813	0.0140151	0.0013196	4.06E-07	0.0162509	0.0002765	26.27509	0.1201299	20.61044	0.1561412	78.43903	0.6103861	33.04475	1.001253	0.1757821	0.0006189	0.0066901	0.0000183	0.0001087	1.81E-06	0.000487	0.0000476	0.0001271	2.41E-06	0.0391129	0.0000297	0.1757821	0.0006189
22021-01K	BD306	Tarosero	60D	09/03/2013	Not mag	30	2.324154	0.0192799	0.0200642	0.0000626	1.50E-07	1.004378	2.38E-15	6.42E-14	0.0212932	0.0004109	0.0667971	0.0526233	0.0068213	0.1031417	0.0133698	-0.000496	3.88E-07	0.0160619	0.0003445	26.95441	0.1215924	20.60036	0.1709993	76.4258	0.6858731	33.06641	1.001253	0.1511103	0.0006111	0.0056061	9.72E-06	0.00009	1.91E-06	0.000295	0.0000381	0.0001194	2.29E-06	0.0340287	0.0000348	0.1511103	0.0006111
22021-01L	BD306	Tarosero	60D	09/03/2013	Not mag	35	2.332619	0.0345201	0.0349674	0.0000626	1.50E-07	1.004324	1.28E-15	3.60E-14	0.0249583	0.0007444	0.0290605	0.0269974	0.0112273	0.0529149	0.0220054	0.0021555	6.38E-07	0.0176718	0.000441	28.12638	0.2152368	20.67544	0.3061705	73.50951	1.189331	33.08785	1.001253	0.0847855	0.000602	0.0030144	7.33E-06	0.0000533	1.31E-06	0.0000814	0.0000337	0.0000752	2.24E-06	0.0194811	0.0000341	0.0847855	0.000602
22018-01A	BD324	Tarosero	60D	08/03/2013	plag	3	3.413757	0.1435044	0.1438316	0.0000625	1.78E-07	1.005243	6.71E-16	1.96E-13	0.8775058	0.0048887	-0.0003282	-0.0102569	0.0269824	-0.0201035	0.0528855	0.0212901	1.53E-06	0.185829	0.002228	292.3437	1.221817	30.30993	1.275347	10.36801	0.3756922	32.39709	1.001245	0.461643	0.0005778	0.0015791	6.12E-06	0.0002934	3.28E-06	-0.0000162	0.0000424	0.0013857	5.46E-06	0.1007772	0.0001413	0.461643	0.0005778
22018-01B	BD324	Tarosero	60D	08/03/2013	plag	5	2.359927	0.0235298	0.0244664	0.0000625	1.78E-07	1.005255	2.23E-15	8.08E-14	0.0512586	0.0005591	0.0081064	0.0156086	0.0088703	0.0305928	0.0173858	0.0021044	5.04E-07	0.0226385	0.0003663	36.25266	0.1668599	20.9471	0.2089914	57.78135	0.5455483	32.41817	1.001246	0.190268	0.0005331	0.0052484	0.0000184	0.0001188	1.85E-06	0.0000819	0.0000463	0.000269	2.77E-06	0.0423176	0.0000298	0.190268	0.0005331
22018-01C	BD324	Tarosero	60D	08/03/2013	plag	7	2.369065	0.0147417	0.0162055	0.0000625	1.78E-07	1.005266	3.62E-15	1.05E-13	0.026418	0.0003201	0.0169344	0.0167795	0.0049249	0.0328879	0.0096529	0.0034654	2.80E-07	0.0184005	0.0002909	28.91607	0.1038538	21.02826	0.130936	72.72263	0.4198888	32.43938	1.001246	0.2468138	0.0005312	0.0085355	0.0000233	0.0001571	2.42E-06	0.0001432	0.0000418	0.0002255	2.66E-06	0.054875	0.0000283	0.2468138	0.0005312
22018-01D	BD324	Tarosero	60D	08/03/2013	plag	9	2.364786	0.0097017	0.0118008	0.0000625	1.78E-07	1.005288	5.50E-15	1.31E-13	0.0094393	0.0001913	0.0414957	0.0147324	0.0036114	0.0288755	0.0070784	0.0013113	2.05E-07	0.0144403	0.0001842	23.80824	0.0676797	20.99026	0.0861702	88.1655	0.3329405	32.48155	1.001246	0.3081794	0.0005304	0.0129442	0.0000273	0.0001869	2.32E-06	0.0001907	0.0000465	0.0001222	2.46E-06	0.068799	0.0000334	0.3081794	0.0005304
22018-01E	BD324	Tarosero	60D	08/03/2013	plag	12	2.351631	0.0057764	0.008832	0.0000625	1.78E-07	1.005300	1.09E-14	2.69E-13	0.0125379	0.000119	0.0215771	0.010278	0.0018219	0.0201449	0.003571	0.0023013	1.04E-07	0.0153691	0.0001493	24.61711	0.0344443	20.87342	0.0513055	84.79415	0.1913374	32.50262	1.001247	0.6325165	0.0006012	0.0256942	0.0000194	0.0003949	3.77E-06	0.0002641	0.0000466	0.0003222	3.05E-06	0.1412662	0.0000319	0.6325165	0.0006012
22018-01F	BD324	Tarosero	60D	08/03/2013	plag	15	2.353029	0.0054827	0.0086458	0.0000625	1.78E-07	1.005311	1.25E-14	3.18E-13	0.0151964	0.0001018	0.0238724	0.0136693	0.0015904	0.0267918	0.0031171	0.0021341	9.04E-08	0.0158151	0.000127	25.42305	0.034352	20.88583	0.0486974	82.15462	0.1670926	32.52369	1.001247	0.7494505	0.0006717	0.0294792	0.0000213	0.0004662	3.68E-06	0.000403	0.0000466	0.000448	2.98E-06	0.1674132	0.0000391	0.7494505	0.0006717
22018-01G	BD324	Tarosero	60D	08/03/2013	plag	17	2.355111	0.0061888	0.0091143	0.0000625	1.78E-07	1.005346	9.52E-15	2.26E-13	0.0093363	0.0001307	0.040794	0.0143344	0.0022142	0.0280954	0.0043399	0.0009144	1.26E-07	0.014284	0.0001359	23.69159	0.0366638	20.90432	0.0549686	88.23693	0.2217208	32.58998	1.001248	0.5313507	0.0005854	0.0224278	0.0000174	0.0003204	3.00E-06	0.0003215	0.0000494	0.0002094	2.93E-06	0.1179183	0.0000386	0.5313507	0.0005854
22018-01H	BD324	Tarosero	60D	08/03/2013	plag	19	2.365505	0.0072076	0.0098546	0.0000625	1.78E-07	1.005357	8.32E-15	1.95E-13	0.0080548	0.000135	0.0396467	0.0120727	0.0025386	0.0236625	0.0049757	0.0029388	1.44E-07	0.0147393	0.000147	23.40147	0.0506164	20.99665	0.0640175	89.72558	0.2375266	32.61115	1.001248	0.4584801	0.0005541	0.0195919	0.0000312	0.0002888	2.80E-06	0.0002365	0.0000495	0.0001578	2.63E-06	0.1019142	0.0000311	0.4584801	0.0005541
22018-01I	BD324	Tarosero	60D	08/03/2013	plag	21	2.373101	0.0103859	0.0123824	0.0000625	1.78E-07	1.005369	4.98E-15	1.21E-13	0.0106579	0.000221	0.0390144	0.0156192	0.0037975	0.0306137	0.0074431	0.0019011	2.16E-07	0.0148746	0.0002348	24.2459	0.0654384	21.06411	0.0922484	86.87856	0.375863	32.63255	1.001248	0.2845612	0.0005518	0.0117365	0.0000194	0.0001746	2.71E-06	0.0001833	0.0000443	0.0001251	2.59E-06	0.0631037	0.0000325	0.2845612	0.0005518
22018-01J	BD324	Tarosero	60D	08/03/2013	plag	25	2.364407	0.0174266	0.0186765	0.0000625	1.78E-07	1.005380	2.96E-15	7.02E-14	0.00922	0.0003528	-0.0001225	0.0002905	0.0061077	0.0005693	0.0119711	-0.0007403	3.47E-07	0.0136919	0.0002867	23.74078	0.1177455	20.9869	0.1547831	88.40281	0.668141	32.65372	1.001248	0.1653764	0.000613	0.0069659	0.0000213	0.0000954	1.95E-06	2.02E-06	0.0000423	0.0000642	2.45E-06	0.0364385	0.0000325	0.1653764	0.000613
22018-01K	BD324	Tarosero	60D	08/03/2013	plag	30	2.361894	0.0315511	0.0322567	0.0000625	1.78E-07	1.005403	1.43E-15	3.40E-14	0.0094514	0.0007043	0.0332993	0.0119027	0.0126775	0.0233293	0.0248478	-0.0014997	7.21E-07	0.0134734	0.0004553	23.78643	0.1903595	20.96457	0.2802361	88.13855	1.263405	32.69651	1.001249	0.0801483	0.0005368	0.0033695	0.0000135	0.0000454	1.51E-06	0.0000401	0.0000425	0.0000318	2.37E-06	0.0181935	0.0000332	0.0801483	0.0005368
22018-01L	BD324	Tarosero	60D	08/03/2013	plag	35	2.352109	0.0440362	0.0445404	0.0000625	1.78E-07	1.005414	1.06E-15	2.66E-14	0.0141473	0.000971	0.0389543	0.0205929	0.017439	0.0403621	0.0341805	0.0000819	9.91E-07	0.0149083	0.0005814	25.10094	0.2719134	20.87767	0.3911267	83.17596	1.68306	32.71813	1.001249	0.0626039	0.000583	0.0024941	0.0000125	0.0000372	1.42E-06	0.0000514	0.0000433	0.0000353	2.41E-06	0.0142659	0.0000312	0.0626039	0.000583
22030-01A	BD510	Tarosero	60E	06/03/2013	plag	3	2.283617	0.2086727	0.2087665	0.0000621	1.70E-07	1.000000	3.65E-16	2.43E-13	2.161561	0.021962	-0.0003246	-0.0254647	0.0470356	-0.0499108	0.0921898	0.0169474	2.67E-06	0.4276603	0.0057584	665.8572	6.581765	20.39039	1.864416	3.062336	0.2784109	31.2401	1.001232	0.5724357	0.0006575	0.0008597	8.44E-06	0.0003677	3.39E-06	-0.0000219	0.0000404	0.0018583	4.86E-06	0.130673	0.0000757	0.5724357	0.0006575
22030-01B	BD510	Tarosero	60E	06/03/2013	plag	5	2.456993	0.0387474	0.0393282	0.0000621	1.70E-07	1.004675	1.48E-15	9.04E-14	0.1313162	0.0009614	-0.0006126	-0.0026257	0.0116105	-0.0051464	0.0227566	-0.0013134	6.60E-07	0.0366316	0.0005984	61.15283	0.2125411	21.93952	0.3462276	35.87702	0.5341896	31.35029	1.001234	0.2128629	0.0005667	0.0034808	7.09E-06	0.0001275	2.05E-06	-9.14E-06	0.0000402	0.0004571	3.21E-06	0.0463207	0.0000361	0.2128629	0.0005667
22030-01C	BD510	Tarosero	60E	06/03/2013	plag	7	2.368943	0.0203508	0.0213614	0.0000621	1.70E-07	1.004686	2.34E-15	6.09E-14	0.0163967	0.0004476	0.0012714	0.0010984	0.0072541	0.0021529	0.014218	0.0018648	4.12E-07	0.0159502	0.0003453	26.0496	0.1330094	21.15277	0.1818355	81.20402	0.7008812	31.37072	1.001234	0.1434823	0.0005304	0.005508	0.0000184	0.0000879	1.86E-06	6.05E-06	0.0000398	0.0000903	2.45E-06	0.0313243	0.0000283	0.1434823	0.0005304
22030-01D	BD510	Tarosero	60E	06/03/2013	plag	9	2.361088	0.0168303	0.0180314	0.0000621	1.70E-07	1.004697	2.84E-15	7.00E-14	0.0118466	0.0003663	0.0192698	0.0087247	0.0060918	0.0171005	0.0119399	0.0024922	3.46E-07	0.015304	0.0002702	24.62001	0.1083294	21.08259	0.1503787	85.63385	0.621889	31.39095	1.001234	0.1648191	0.0005412	0.0066945	0.0000184	0.0001025	1.77E-06	0.0000584	0.0000406	0.0000793	2.44E-06	0.0356887	0.0000269	0.1648191	0.0005412
22030-01E	BD510	Tarosero	60E	06/03/2013	plag	12	2.351232	0.011616	0.0132838	0.0000621	1.70E-07	1.004720	4.68E-15	1.18E-13	0.0139623	0.0002402	0.0032912	0.0020214	0.0038999	0.003962	0.0076437	0.0022934	2.22E-07	0.0156366	0.0002075	25.16434	0.0798487	20.99452	0.1037891	83.43187	0.397538	31.43182	1.001235	0.277241	0.0005886	0.0110172	0.0000243	0.0001723	2.23E-06	0.0000223	0.0000428	0.0001538	2.62E-06	0.0614203	0.0000277	0.277241	0.0005886
22030-01F	BD510	Tarosero	60E	06/03/2013	plag	15	2.348659	0.0080153	0.0102801	0.0000621	1.70E-07	1.004731	6.67E-15	1.60E-13	0.0101526	0.0001707	0.015014	0.0059361	0.0028996	0.0116347	0.0056831	0.0031149	1.65E-07	0.0151978	0.0001935	24.00336	0.0502277	20.97153	0.0716163	87.37136	0.3042141	31.4521	1.001235	0.3769855	0.0006131	0.0157055	0.0000174	0.0002387	3.00E-06	0.0000932	0.0000453	0.0001595	2.67E-06	0.0830928	0.0000334	0.3769855	0.0006131
22030-01G	BD510	Tarosero	60E	07/03/2013	plag	17	2.353671	0.0100406	0.0119343	0.0000621	1.70E-07	1.004742	4.85E-15	1.14E-13	0.0081558	0.0002248	0.0057525	0.0020569	0.003988	0.0040315	0.0078165	0.0008392	2.27E-07	0.0140348	0.0002315	23.45225	0.0597093	21.01631	0.089713	89.61576	0.406138	31.47284	1.001235	0.2677084	0.0005689	0.011415	0.0000135	0.0001602	2.61E-06	0.0000235	0.0000453	0.0000931	2.56E-06	0.0594419	0.0000277	0.2677084	0.0005689
22030-01H	BD510	Tarosero	60E	07/03/2013	plag	19	2.341135	0.0130047	0.0145015	0.0000621	1.70E-07	1.004777	3.88E-15	9.09E-14	0.0084524	0.0002651	0.023538	0.0076464	0.0047176	0.014987	0.0092465	0.0023811	2.68E-07	0.0146225	0.0002389	23.42827	0.0888535	20.9043	0.1161963	89.22903	0.493763	31.53621	1.001236	0.2140728	0.0005706	0.0091374	0.0000233	0.0001336	2.13E-06	0.0000699	0.0000429	0.0000772	2.41E-06	0.0463964	0.0000366	0.2140728	0.0005706
22030-01I	BD510	Tarosero	60E	07/03/2013	plag	21	2.360368	0.0142417	0.0156421	0.0000621	1.70E-07	1.004788	3.39E-15	8.15E-14	0.0098503	0.0003029	-0.0004991	0.0001513	0.0049975	0.0002965	0.009795	0.0013195	2.84E-07	0.0145216	0.0002608	24.01825	0.0943259	21.07615	0.1272502	87.75311	0.5258207	31.55679	1.001236	0.1919565	0.0005259	0.0079921	0.0000213	0.0001161	2.04E-06	1.21E-06	0.0000398	0.0000787	2.41E-06	0.0417228	0.0000355	0.1919565	0.0005259
22030-01J	BD510	Tarosero	60E	07/03/2013	plag	25	2.346358	0.0171804	0.0183445	0.0000621	1.70E-07	1.004800	2.61E-15	6.40E-14	0.0120212	0.0003997	0.005811	0.0029002	0.006829	0.0056844	0.0133849	0.0000403	3.88E-07	0.0144918	0.000291	24.54106	0.0979723	20.95097	0.1535064	85.37337	0.6760651	31.57726	1.001236	0.1506737	0.0005328	0.0061397	9.86E-06	0.000089	1.76E-06	0.0000178	0.0000417	0.0000738	2.45E-06	0.0329414	0.000034	0.1506737	0.0005328
22030-01K	BD510	Tarosero	60E	07/03/2013	plag	30	2.359988	0.0482639	0.0486954	0.0000621	1.70E-07	1.004811	8.80E-16	2.19E-14	0.0128929	0.0011192	-0.0794689	-0.0373365	0.0188475	-0.0731795	0.0369411	-0.001059	1.07E-06	0.0142796	0.0005983	24.92702	0.2802958	21.07276	0.4312389	84.54244	1.878342	31.59777	1.001237	0.051651	0.0005139	0.0020721	9.86E-06	0.0000296	1.22E-06	-0.0000774	0.0000389	0.0000267	2.32E-06	0.0109481	0.0000331	0.051651	0.0005139
22030-01L	BD510	Tarosero	60E	07/03/2013	plag	35	2.365991	0.105417	0.1056163	0.0000621	1.70E-07	1.004834	4.15E-16	9.58E-15	0.0064976	0.0023079	0.0173483	0.0044762	0.0435561	0.0087733	0.08537	0.0041872	2.48E-06	0.014875	0.0011008	23.06693	0.6618388	21.12639	0.9419061	91.58985	4.30671	31.63916	1.001237	0.0225564	0.000511	0.0009779	0.0000164	0.0000145	1.04E-06	4.38E-06	0.0000424	6.35E-06	2.25E-06	0.0055933	0.0000251	0.0225564	0.000511
22017-01A	BD512	Tarosero	60D	25/02/2013	matrix	3	2.102673	0.2529834	0.2530448	0.0000626	1.66E-07	1.00331	8.54E-16	2.93E-13	1.088582	0.0116198	0.0018648	0.0749623	0.0186552	0.146926	0.0365642	0.0391367	1.06E-06	0.2319784	0.0033574	343.6977	3.677204	18.64266	2.244301	5.423867	0.6139547	26.16523	1.001169	0.6910032	0.0030482	0.0020105	0.0000193	0.0004664	4.97E-06	0.0001507	0.0000374	0.0021886	9.72E-06	0.1623436	0.0005603	0.6910032	0.0030482
22017-01B	BD512	Tarosero	60D	25/02/2013	matrix	5	2.418543	0.0167785	0.0179599	0.0000626	1.66E-07	1.003262	7.30E-15	2.92E-13	0.0622483	0.000348	0.0134639	0.0311446	0.0029486	0.0610434	0.0057792	0.0025052	1.68E-07	0.0248587	0.0002981	40.03079	0.1635669	21.44508	0.1488736	53.57124	0.3101772	26.19869	1.001169	0.688541	0.0014077	0.0172003	0.0000592	0.0004276	4.87E-06	0.0005357	0.0000505	0.0010707	4.69E-06	0.1577677	0.0002907	0.688541	0.0014077
22017-01C	BD512	Tarosero	60D	25/02/2013	matrix	7	2.330713	0.0064132	0.008902	0.0000626	1.66E-07	1.003238	1.15E-14	2.61E-13	0.0069379	0.0000978	0.0800163	0.0207418	0.0017943	0.0406539	0.0035168	0.0012623	1.02E-07	0.0139492	0.0001901	22.73628	0.0493609	20.6658	0.0569006	90.895	0.2525667	26.21493	1.00117	0.6135032	0.0009818	0.0269834	0.0000352	0.0003764	5.07E-06	0.0005597	0.0000483	0.0001872	2.63E-06	0.1375677	0.0001513	0.6135032	0.0009818
22017-01D	BD512	Tarosero	60D	25/02/2013	matrix	9	2.324751	0.0087442	0.010695	0.0000626	1.66E-07	1.003214	8.81E-15	1.92E-13	0.0040667	0.0001189	0.1824221	0.0276062	0.0020143	0.0541082	0.003948	0.001259	1.15E-07	0.0134037	0.0001871	21.82535	0.0708787	20.6129	0.0775819	94.44597	0.3174102	26.23137	1.00117	0.4527376	0.000892	0.0207437	0.0000512	0.000278	3.79E-06	0.0005727	0.0000416	0.0000844	2.46E-06	0.1016207	0.0001118	0.4527376	0.000892
22017-01E	BD512	Tarosero	60D	25/02/2013	matrix	12	2.322486	0.0064211	0.0088926	0.0000626	1.66E-07	1.003137	8.11E-15	1.77E-13	0.0042894	0.0001242	0.6171529	0.0976551	0.0038063	0.191404	0.0074604	0.0007415	2.16E-07	0.0132646	0.0001802	21.86502	0.0433836	20.5928	0.0569707	94.178	0.2579265	26.28527	1.001171	0.4174589	0.0005869	0.0190925	0.0000233	0.0002533	3.40E-06	0.0018645	0.0000724	0.0000819	2.37E-06	0.0930671	0.0000434	0.4174589	0.0005869
22017-01F	BD512	Tarosero	60D	25/02/2013	matrix	17	2.321179	0.0077389	0.0098841	0.0000626	1.66E-07	1.003113	6.74E-15	1.50E-13	0.0054492	0.0001497	1.109765	0.2226612	0.0052211	0.4364159	0.0102334	0.0012471	2.97E-07	0.0136536	0.0002535	22.18779	0.0523182	20.58121	0.0686625	92.74743	0.323379	26.30162	1.001171	0.3520604	0.000649	0.0158673	0.0000203	0.0002166	3.99E-06	0.003533	0.0000825	0.0000865	2.37E-06	0.0780881	0.0000314	0.3520604	0.000649
22017-01G	BD512	Tarosero	60D	25/02/2013	matrix	20	2.326881	0.0195091	0.0204596	0.0000626	1.66E-07	1.003089	2.58E-15	5.83E-14	0.0065788	0.0003846	0.9687666	0.2346465	0.0111946	0.4599072	0.0219414	0.0027925	6.37E-07	0.0144001	0.0004244	22.57454	0.1348281	20.6318	0.1730929	91.38173	0.7601596	26.31815	1.001171	0.1371768	0.0005692	0.0060766	0.0000253	0.0000875	2.54E-06	0.0014259	0.0000676	0.00004	2.33E-06	0.0302448	0.0000242	0.1371768	0.0005692
22017-01H	BD512	Tarosero	60D	25/02/2013	matrix	25	2.351052	0.0385063	0.0390067	0.0000626	1.66E-07	1.003066	1.12E-15	2.57E-14	0.0074138	0.0008565	1.167195	0.3184701	0.0203139	0.6242014	0.0398153	0.0023961	1.15E-06	0.0144182	0.0006908	23.03024	0.2294504	20.84626	0.3416497	90.49917	1.653498	26.33464	1.001171	0.060518	0.0005462	0.0026278	0.0000102	0.0000379	1.80E-06	0.0008369	0.0000531	0.0000195	2.25E-06	0.0134272	0.0000262	0.060518	0.0005462
22017-01I	BD512	Tarosero	60D	26/02/2013	matrix	35	2.374523	0.0832697	0.0835069	0.0000626	1.66E-07	1.003018	5.06E-16	1.17E-14	0.006931	0.0018718	1.113045	0.2839552	0.0370868	0.5565522	0.07269	0.0002089	2.11E-06	0.0135739	0.0013001	23.0976	0.4870283	21.0545	0.7388245	91.13889	3.620179	26.36808	1.001172	0.0275389	0.0005445	0.0011923	7.81E-06	0.0000162	1.54E-06	0.0003386	0.000044	8.26E-06	2.23E-06	0.0061831	0.0000222	0.0275389	0.0005445
22007-01A	BD521	Tarosero	60C	23/02/2013	wr	3	2.705946	0.0524655	0.0534224	0.0000628	2.34E-07	1.004605	1.79E-15	1.17E-13	0.1380101	0.0014254	0.0235342	0.1197421	0.0105619	0.2346944	0.0207014	0.0158633	6.00E-07	0.0438181	0.0009075	65.08674	0.3909918	23.88656	0.4634833	36.69685	0.6852206	25.28565	1.001157	0.2750585	0.0009405	0.004226	0.0000203	0.0001852	3.69E-06	0.000506	0.0000444	0.0005832	5.31E-06	0.0605053	0.0003408	0.2750585	0.0009405
22007-01B	BD521	Tarosero	60C	23/02/2013	wr	5	2.461222	0.0232503	0.0249883	0.0000628	2.34E-07	1.004583	5.88E-15	1.67E-13	0.0226001	0.0003207	0.096796	0.0807583	0.0039047	0.1582862	0.0076532	0.0111288	2.22E-07	0.0203169	0.0003615	28.46633	0.2254836	21.7248	0.2053662	76.31505	0.5665104	25.30095	1.001157	0.3943898	0.0015005	0.0138546	0.0000942	0.0002815	4.57E-06	0.0011189	0.0000533	0.0003131	3.88E-06	0.0874323	0.0005605	0.3943898	0.0015005
22007-01C	BD521	Tarosero	60C	23/02/2013	wr	7	2.345216	0.0128998	0.0155734	0.0000628	2.34E-07	1.00456	9.37E-15	2.10E-13	0.0059138	0.0001148	0.3227596	0.0705065	0.0027587	0.1381927	0.005407	0.0076812	1.57E-07	0.0159665	0.0002449	22.46007	0.1140536	20.70017	0.1139346	92.1626	0.4419012	25.3163	1.001157	0.4955667	0.0015005	0.0220643	0.0000872	0.0003523	5.17E-06	0.0015557	0.0000603	0.0001305	2.48E-06	0.1143203	0.0003408	0.4955667	0.0015005
22007-01D	BD521	Tarosero	60C	24/02/2013	wr	9	2.346311	0.0063127	0.0107726	0.0000628	2.34E-07	1.004116	8.97E-15	1.97E-13	0.0042846	0.0001115	0.4289716	0.0679044	0.0025659	0.1330926	0.0050291	0.0061091	1.46E-07	0.0151158	0.0001914	21.98347	0.0455823	20.70984	0.0557559	94.20486	0.2511178	25.61467	1.001161	0.4645517	0.000672	0.0211319	0.0000292	0.0003194	3.99E-06	0.0014349	0.000054	0.0000905	2.35E-06	0.1040521	0.0000789	0.4645517	0.000672
22007-01E	BD521	Tarosero	60C	24/02/2013	wr	12	2.346465	0.0065083	0.0108888	0.0000628	2.34E-07	1.004092	8.81E-15	1.95E-13	0.0047329	0.0001136	0.8713701	0.1519538	0.0041328	0.2978294	0.0081004	0.0062048	2.35E-07	0.0152303	0.0002186	22.11064	0.0471878	20.7112	0.0574829	93.66359	0.2678677	25.63076	1.001162	0.4586242	0.0007292	0.0207422	0.0000272	0.0003159	4.48E-06	0.0031519	0.0000853	0.0000982	2.35E-06	0.1022219	0.0000836	0.4586242	0.0007292
22007-01F	BD521	Tarosero	60C	24/02/2013	wr	17	2.344127	0.0089999	0.0125321	0.0000628	2.34E-07	1.004068	8.38E-15	1.95E-13	0.0087705	0.0001324	2.099575	0.6773283	0.0085952	1.327564	0.0168465	0.0055716	4.90E-07	0.0157558	0.0002024	23.24526	0.0732817	20.69055	0.0794894	88.9696	0.31183	25.64692	1.001162	0.458679	0.000892	0.0197322	0.0000472	0.0003109	3.89E-06	0.0133651	0.0001658	0.0001731	2.58E-06	0.1025231	0.0000892	0.458679	0.000892
22007-01G	BD521	Tarosero	60C	24/02/2013	wr	20	2.370843	0.0124892	0.0152899	0.0000628	2.34E-07	1.004044	3.85E-15	8.96E-14	0.0081201	0.0002547	2.078504	0.6208368	0.0109142	1.21684	0.0213918	0.0029917	6.21E-07	0.0147452	0.0003475	23.29234	0.0822469	20.92651	0.11031	89.80597	0.5005366	25.66316	1.001162	0.2109763	0.0005909	0.0090578	0.0000183	0.0001336	3.11E-06	0.0056234	0.0000978	0.0000736	2.30E-06	0.0469285	0.000034	0.2109763	0.0005909
22007-01H	BD521	Tarosero	60C	24/02/2013	wr	25	2.378872	0.0131955	0.0158886	0.0000628	2.34E-07	1.003996	3.48E-15	8.36E-14	0.0104432	0.0002816	2.687704	1.032255	0.0164225	2.02322	0.0321881	0.0047875	9.35E-07	0.0157879	0.0003483	24.01736	0.0831807	20.99743	0.1165489	87.36444	0.5147572	25.69602	1.001162	0.1968839	0.0005554	0.0081976	0.0000154	0.0001294	2.82E-06	0.008462	0.0001331	0.0000856	2.30E-06	0.0435929	0.0000311	0.1968839	0.0005554
22007-01I	BD521	Tarosero	60C	24/02/2013	wr	35	2.372505	0.0149294	0.0173434	0.0000628	2.34E-07	1.003972	3.13E-15	7.79E-14	0.0135345	0.0003206	2.215012	1.102505	0.0162737	2.16091	0.0318965	0.0067577	9.26E-07	0.0170503	0.0003491	24.8775	0.0951141	20.94119	0.1318626	84.11363	0.5525446	25.71232	1.001163	0.1833274	0.0005532	0.0073692	0.0000163	0.0001256	2.54E-06	0.0081246	0.000118	0.0000997	2.35E-06	0.0406465	0.0000318	0.1833274	0.0005532
22006-01A	BD521	Tarosero	60C	23/02/2013	plag	3	2.358197	0.0387761	0.0393939	0.0000627	1.85E-07	1.005191	1.52E-15	7.01E-14	0.0851042	0.0009367	0.7219287	2.259124	0.033988	4.427883	0.0666165	0.0047069	1.94E-06	0.0298585	0.0008409	46.05799	0.3318628	20.86129	0.3432486	45.22149	0.6971494	24.89757	1.001151	0.1649998	0.0006903	0.0035824	0.0000203	0.000107	2.92E-06	0.0080932	0.0001119	0.0003049	2.86E-06	0.0366621	0.000087	0.1649998	0.0006903
22006-01B	BD521	Tarosero	60C	23/02/2013	plag	5	2.396672	0.0236732	0.0247043	0.0000627	1.85E-07	1.005169	2.16E-15	5.93E-14	0.0218159	0.0004912	2.969934	2.382379	0.0294672	4.669463	0.0577557	0.0036296	1.68E-06	0.0174889	0.000419	27.48764	0.1686724	21.20189	0.2095615	77.00376	0.7385968	24.91255	1.001151	0.139657	0.0005692	0.0050807	0.0000223	0.0000889	2.07E-06	0.0121042	0.0001389	0.0001108	2.45E-06	0.030376	0.0000316	0.139657	0.0005692
22006-01C	BD521	Tarosero	60C	23/02/2013	plag	7	2.391277	0.0276048	0.02849	0.0000627	1.85E-07	1.005146	1.68E-15	4.59E-14	0.0210689	0.0006188	3.136646	2.429951	0.0335042	4.762704	0.0656683	-0.0011701	1.91E-06	0.0156904	0.0005525	27.21233	0.1661177	21.15413	0.2443642	77.60501	0.9485726	24.92768	1.001152	0.1079643	0.0005604	0.0039675	0.0000115	0.0000623	2.16E-06	0.0096408	0.0001291	0.0000836	2.44E-06	0.0233864	0.0000354	0.1079643	0.0005604
22006-01D	BD521	Tarosero	60C	23/02/2013	plag	9	2.397404	0.0291134	0.0299584	0.0000627	1.85E-07	1.005123	1.57E-15	4.45E-14	0.0249361	0.0006416	2.488535	2.281738	0.0307685	4.472206	0.0603063	0.0039487	1.76E-06	0.0181943	0.0005702	28.43551	0.1812464	21.20836	0.25772	74.46491	0.952969	24.94262	1.001152	0.104818	0.0005632	0.0036862	0.0000115	0.0000671	2.07E-06	0.0084109	0.0001096	0.0000919	2.35E-06	0.0228222	0.0000341	0.104818	0.0005632
22006-01E	BD521	Tarosero	60C	23/02/2013	plag	12	2.395229	0.0205444	0.0217231	0.0000627	1.85E-07	1.005077	2.48E-15	8.08E-14	0.0388156	0.0004734	1.613602	2.303011	0.0270555	4.513902	0.0530288	0.0036075	1.55E-06	0.020706	0.0004253	32.5588	0.1246323	21.18911	0.1818643	64.97435	0.551925	24.97317	1.001152	0.1901747	0.0005511	0.005841	0.0000135	0.0001209	2.44E-06	0.0134518	0.000154	0.0002267	2.71E-06	0.0415402	0.000027	0.1901747	0.0005511
22006-01F	BD521	Tarosero	60C	23/02/2013	plag	17	2.388737	0.0273476	0.028239	0.0000627	1.85E-07	1.005054	1.89E-15	5.64E-14	0.0299749	0.0005886	2.581139	2.844795	0.0371476	5.575798	0.0728092	-0.0023105	2.12E-06	0.016968	0.0004978	29.80937	0.1998456	21.13164	0.2420872	70.74753	0.7758991	24.9882	1.001152	0.1328028	0.0005632	0.0044551	0.0000223	0.0000756	2.16E-06	0.0126738	0.0001516	0.0001335	2.53E-06	0.0288092	0.0000283	0.1328028	0.0005632
22006-01G	BD521	Tarosero	60C	23/02/2013	plag	20	2.415363	0.0672873	0.0676627	0.0000627	1.85E-07	1.005031	6.72E-16	2.09E-14	0.0337776	0.0014869	2.602596	3.232296	0.0620869	6.3353	0.1216904	0.0005166	3.54E-06	0.0186477	0.0010506	31.14276	0.4555502	21.36734	0.5956514	68.45482	1.948827	25.00337	1.001153	0.0492514	0.0005459	0.0015815	0.0000144	0.0000295	1.62E-06	0.0051118	0.0000856	0.0000534	2.30E-06	0.0103764	0.000027	0.0492514	0.0005459
22006-01H	BD521	Tarosero	60C	23/02/2013	plag	25	2.3967	0.0803016	0.0806116	0.0000627	1.85E-07	1.004958	5.39E-16	1.95E-14	0.0512791	0.0018433	1.745545	3.291142	0.0873251	6.450638	0.1711571	0.0013702	4.97E-06	0.0222562	0.0012306	36.1984	0.4825106	21.20213	0.7108507	58.43609	2.046062	25.05156	1.001153	0.0459049	0.0005426	0.0012681	7.06E-06	0.0000282	1.54E-06	0.0041736	0.0001077	0.000065	2.31E-06	0.0103727	0.0000284	0.0459049	0.0005426
22006-01I	BD521	Tarosero	60C	23/02/2013	plag	35	2.461573	0.1305065	0.1307079	0.0000627	1.85E-07	1.004935	3.30E-16	1.56E-14	0.0865429	0.0030422	1.050037	3.341258	0.0899984	6.548866	0.1763968	0.0112711	5.12E-06	0.0323507	0.0018025	47.29659	0.7982924	21.77641	1.155319	45.93356	2.500522	25.06685	1.001154	0.0366995	0.0005425	0.0007759	5.78E-06	0.0000251	1.37E-06	0.0025926	0.0000667	0.0000672	2.31E-06	0.0082256	0.0000297	0.0366995	0.0005425
KETUMBEINE
21584-01A	10-KTM-01	Ketumbeine	56f	14/05/2012	matrix	3	0.7798588	0.2893552	0.2893585	0.0000614	1.09E-07	1.000621	6.03E-16	2.86E-13	1.567534	0.0489347	0.0161983	0.9338414	0.154433	1.830329	0.3026888	0.0003665	8.78E-06	0.3093358	0.0097193	475.0433	14.81665	7.041843	2.613337	1.481376	0.2216095	67.86509	1.00151	0.674609	0.0006531	0.0014201	0.0000442	0.0004393	1.72E-06	0.0013261	0.0002152	0.0022261	4.50E-06	0.1622389	0.0000241	0.0005003	0.0000416
21584-01B	10-KTM-01	Ketumbeine	56f	14/05/2012	matrix	5	2.100264	0.0539045	0.054034	0.0000614	1.09E-07	1.000624	2.02E-15	1.63E-13	0.2070042	0.0020363	0.2079634	1.583026	0.070484	3.102731	0.1381487	0.0077868	4.01E-06	0.0540481	0.0005681	80.63589	0.7903352	18.97157	0.4871999	23.50118	0.3876547	67.922	1.001511	0.3832669	0.0011077	0.0047531	0.000044	0.0002569	1.23E-06	0.0075242	0.0003274	0.0009839	3.19E-06	0.0904676	0.000028	0.0011531	0.0000332
21584-01C	10-KTM-01	Ketumbeine	56f	15/05/2012	matrix	7	2.050244	0.0164144	0.0168152	0.0000614	1.09E-07	1.000626	3.55E-15	8.36E-14	0.0170779	0.0002412	1.899802	1.193151	0.0377034	2.338575	0.0738986	0.0059119	2.15E-06	0.0174264	0.0001573	23.50723	0.1509954	18.51948	0.1483526	78.7176	0.4567158	67.97894	1.001511	0.1967392	0.0005554	0.0083693	0.000047	0.0001458	1.01E-06	0.0099858	0.0003102	0.0001429	1.85E-06	0.0476349	0.0000264	0.0020952	0.0000354
21584-01D	10-KTM-01	Ketumbeine	56f	15/05/2012	matrix	9	2.063014	0.0127928	0.0133095	0.0000614	1.09E-07	1.000631	3.47E-15	7.17E-14	0.0072091	0.0001973	4.209707	1.11608	0.0356858	2.187516	0.0699442	0.0024349	2.03E-06	0.0143604	0.0002923	20.68291	0.1062466	18.6349	0.1156219	90.02962	0.3645234	68.09225	1.001512	0.1687587	0.0002907	0.0081593	0.0000381	0.0001172	2.31E-06	0.0091065	0.0002878	0.0000588	1.59E-06	0.0421968	0.0000206	0.0018104	0.0000312
21584-01E	10-KTM-01	Ketumbeine	56f	15/05/2012	matrix	12	2.0809	0.0134213	0.0139231	0.0000614	1.09E-07	1.000634	3.32E-15	6.91E-14	0.0070486	0.0002091	3.979775	1.031648	0.0424787	2.022029	0.0832583	0.0046178	2.42E-06	0.0150861	0.0002942	20.80449	0.1117143	18.79656	0.121303	90.28536	0.3525419	68.14884	1.001512	0.1626212	0.0002302	0.0078166	0.0000393	0.0001179	2.21E-06	0.008064	0.0003293	0.0000551	1.61E-06	0.0406463	0.0000206	0.0016397	0.0000347
21584-01F	10-KTM-01	Ketumbeine	56f	15/05/2012	matrix	17	2.067348	0.018774	0.0191312	0.0000614	1.09E-07	1.000641	2.31E-15	5.52E-14	0.0180984	0.0003461	3.057134	2.034492	0.0581545	3.987603	0.1139829	0.0047397	3.32E-06	0.0171814	0.0003722	23.88689	0.1679844	18.67407	0.1696798	78.06626	0.4404819	68.32926	1.001513	0.1299262	0.0001769	0.0054392	0.0000369	0.0000935	1.92E-06	0.0110661	0.000307	0.0000984	1.76E-06	0.0319158	0.0000225	0.0014094	0.0000333
21584-01G	10-KTM-01	Ketumbeine	56f	15/05/2012	matrix	25	2.033876	0.0498409	0.0499722	0.0000614	1.09E-07	1.000644	9.12E-16	3.03E-14	0.0517649	0.0012165	3.386776	6.44577	0.2025713	12.63371	0.3970397	0.0094707	0.0000115	0.0250134	0.0008393	33.22205	0.6203085	18.37155	0.4504555	55.04701	0.9183425	68.38656	1.001513	0.0713533	0.000364	0.0021478	0.0000384	0.0000537	1.52E-06	0.013844	0.0003571	0.0001112	1.69E-06	0.0175872	0.0000236	0.000604	0.0000333
21584-01H	10-KTM-01	Ketumbeine	56f	15/05/2012	matrix	35	1.579825	0.0617216	0.0617856	0.0000614	1.09E-07	1.000646	5.71E-16	1.66E-14	0.0521542	0.0018927	4.29993	8.245169	0.3518952	16.16053	0.6897146	0.0124148	0.00002	0.0260293	0.0011676	29.08958	0.8197167	14.26841	0.5576912	48.76354	1.302441	68.44372	1.001514	0.0391028	0.0001363	0.0013442	0.0000375	0.000035	1.23E-06	0.0110833	0.0003573	0.0000701	1.62E-06	0.0099563	0.0000236	0.0001723	0.0000333
21757-01A	10-KTM-02	Ketumbeine	58a	07/01/2013	matrix	3	5.172866	0.6008777	0.6009246	0.0000613	8.91E-08	0.9993747	1.74E-16	3.12E-13	5.856272	0.1278177	0.0118769	2.557478	1.091425	5.012658	2.139194	0.0647311	0.000062	1.14418	0.0266221	1795.304	38.97086	46.85532	5.450498	2.605137	0.2505246	124.1613	1.001727	0.7345472	0.000585	0.0004091	8.89E-06	0.0004681	3.94E-06	0.0010464	0.0004463	0.0023961	5.84E-06	0.162592	0.0000532	-0.0001631	0.0000474
21757-01B	10-KTM-02	Ketumbeine	58a	07/01/2013	matrix	5	2.114886	0.0782367	0.078297	0.0000613	8.91E-08	0.9993472	8.73E-16	1.98E-13	0.6969319	0.0047984	0.057894	1.483721	0.2240652	2.908093	0.4391679	-0.0001518	0.0000127	0.1441559	0.0017829	227.1111	1.445685	19.14019	0.7084745	8.418817	0.2656555	124.2731	1.001727	0.4669166	0.0003686	0.0020559	0.000013	0.0002964	3.16E-06	0.0030504	0.0004606	0.0014328	3.96E-06	0.1040374	0.0000234	0.0003506	0.0000446
21757-01C	10-KTM-02	Ketumbeine	58a	07/01/2013	matrix	7	2.134801	0.021798	0.0220177	0.0000613	8.91E-08	0.9993198	1.89E-15	1.11E-13	0.1316828	0.0007864	0.2673238	1.294521	0.1057298	2.537261	0.2072305	0.0013714	6.01E-06	0.0375742	0.0005602	58.52015	0.277834	19.32053	0.1973949	32.9852	0.2754629	124.3848	1.001728	0.260624	0.0002621	0.0044536	0.0000206	0.0001673	2.37E-06	0.0057652	0.0004704	0.0005865	2.22E-06	0.0586937	0.0000198	0.0008209	0.0000377
21757-01D	10-KTM-02	Ketumbeine	58a	07/01/2013	matrix	9	2.111606	0.0154259	0.0157282	0.0000613	8.91E-08	0.9992656	2.57E-15	8.07E-14	0.0413242	0.0003278	0.7638642	1.16085	0.0796286	2.275267	0.156072	0.002077	4.53E-06	0.0207	0.00034	31.34099	0.1544384	19.11049	0.1396897	60.92707	0.3717689	124.6058	1.001728	0.1899763	0.0004293	0.0060616	0.0000265	0.0001255	1.99E-06	0.0070366	0.0004821	0.0002505	1.66E-06	0.0442147	0.0000192	0.0014867	0.0000341
21757-01E	10-KTM-02	Ketumbeine	58a	07/01/2013	matrix	12	2.113375	0.0108494	0.0112757	0.0000613	8.91E-08	0.9992381	2.97E-15	7.44E-14	0.0200508	0.0002221	1.394814	1.028537	0.0706345	2.015933	0.1384436	0.0017396	4.02E-06	0.0165577	0.0002893	25.0171	0.0912124	19.12651	0.0982474	76.40001	0.3059951	124.7181	1.001729	0.175089	0.0002384	0.0069988	0.0000236	0.0001159	1.99E-06	0.0071985	0.0004941	0.0001403	1.48E-06	0.0396502	0.0000186	0.0015466	0.0000347
21757-01F	10-KTM-02	Ketumbeine	58a	07/01/2013	matrix	17	2.098838	0.0121445	0.0125217	0.0000613	8.91E-08	0.9992102	2.75E-15	7.87E-14	0.0328034	0.0002682	1.167579	1.408439	0.0765656	2.76054	0.1500687	0.0051788	4.35E-06	0.0201448	0.0003439	28.6576	0.1090947	18.99487	0.109974	66.21741	0.3100629	124.832	1.001729	0.1854269	0.0002758	0.0064704	0.0000226	0.0001303	2.18E-06	0.0091132	0.0004948	0.0002123	1.57E-06	0.0415639	0.0000198	0.0014111	0.0000361
21757-01G	10-KTM-02	Ketumbeine	58a	07/01/2013	matrix	25	2.01734	0.0151261	0.0154076	0.0000613	8.91E-08	0.9991251	2.30E-15	9.72E-14	0.0811932	0.0003935	1.05161	3.13943	0.0952723	6.153284	0.1867337	0.0088719	5.42E-06	0.0305178	0.0004242	42.20697	0.1056761	18.25689	0.1369676	43.15981	0.2956305	125.1804	1.00173	0.2288432	0.0003203	0.0054219	0.0000111	0.0001655	2.28E-06	0.0170218	0.0005158	0.0004402	1.94E-06	0.0515379	0.0000233	0.0012406	0.0000318
21757-01H	10-KTM-02	Ketumbeine	58a	07/01/2013	matrix	35	2.045548	0.0330252	0.0331587	0.0000613	8.91E-08	0.9990974	8.73E-16	4.40E-14	0.1079922	0.0010555	0.9458529	3.755653	0.2428111	7.361081	0.4759098	0.0104236	0.0000138	0.0361063	0.0007719	50.40614	0.3376027	18.51232	0.2990494	36.62877	0.5362464	125.2943	1.00173	0.1036733	0.0002335	0.0020568	0.000013	0.0000743	1.52E-06	0.0077245	0.0004975	0.0002221	1.66E-06	0.0231239	0.0000208	0.0003845	0.0000325
21541-01A	10-KTM-02	Ketumbeine	56c	14/04/2012	plag	3	-0.8143966	1.100102	1.108532	0.0000597	0.00001	1.001684	2.90E-17	3.99E-14	4.64177	0.3258883	0.0503119	8.58623	1.643397	16.82901	3.221058	0.0948032	0.0000934	0.9241566	0.0712866	1377.869	96.55045	-7.559768	10.20957	-0.5453076	0.7283339	37.41945	1.001297	0.09405	0.0003826	0.0000683	4.75E-06	0.0000631	2.04E-06	0.0005861	0.0001042	0.0003168	1.90E-06	0.0201608	0.0000219	0.0001116	0.000041
21541-01B	10-KTM-02	Ketumbeine	56c	14/04/2012	plag	5	2.01775	0.5072761	0.6094532	0.0000597	0.00001	1.001684	5.11E-17	8.93E-15	0.5270493	0.0235345	0.8205307	15.8996	1.165729	31.16321	2.284828	-0.0104271	0.0000663	0.1078344	0.0117857	174.6244	7.527962	18.7448	4.715206	10.61305	2.641295	37.44829	1.001297	0.021026	0.0003748	0.0001204	4.70E-06	0.000013	1.32E-06	0.0019144	0.0001184	0.0000635	1.36E-06	0.0043259	0.0000206	0.0001238	0.0000318
21541-01C	10-KTM-02	Ketumbeine	56c	14/04/2012	plag	7	2.123774	0.3296129	0.4848174	0.0000597	0.00001	1.001684	7.58E-17	3.82E-15	0.1083917	0.0076407	4.517904	18.00413	0.7761717	35.28809	1.521296	0.0146618	0.0000441	0.0370647	0.0070716	50.38301	2.500882	19.73034	3.06398	38.65994	6.122704	37.50591	1.001298	0.0089896	0.0003724	0.0001784	4.78E-06	6.61E-06	1.24E-06	0.0032124	0.000108	0.0000193	1.26E-06	0.0019157	0.0000234	0.0000481	0.0000456
21541-01D	10-KTM-02	Ketumbeine	56c	14/04/2012	plag	9	2.015378	0.2483452	0.4189411	0.0000597	0.00001	1.001684	9.97E-17	3.91E-15	0.0741273	0.0055182	6.179132	16.84011	0.6850366	33.00662	1.342672	0.0074566	0.0000389	0.0281343	0.005166	39.26666	1.802341	18.72276	2.308402	47.11099	6.025587	37.535	1.001298	0.0092163	0.000372	0.0002347	4.99E-06	6.60E-06	1.20E-06	0.0039525	0.0001366	0.0000174	1.24E-06	0.0018559	0.0000222	8.20E-06	0.0000456
21541-01E	10-KTM-02	Ketumbeine	56c	14/04/2012	plag	12	1.992362	0.1837232	0.3807975	0.0000597	0.00001	1.001684	1.40E-16	6.34E-15	0.0953647	0.0043251	5.133654	17.99919	0.5486928	35.27842	1.075438	0.0070477	0.0000312	0.0319708	0.0039894	45.28759	1.33844	18.50882	1.707711	40.34712	3.800627	37.56392	1.001299	0.01494	0.0003715	0.0003299	5.15E-06	0.0000105	1.30E-06	0.0059378	0.0001549	0.0000315	1.34E-06	0.003286	0.0000222	0.000166	0.0000444
21541-01F	10-KTM-02	Ketumbeine	56c	15/04/2012	plag	17	2.241547	0.1204662	0.394099	0.0000597	0.00001	1.000458	2.24E-16	1.22E-14	0.1188725	0.0029666	4.489766	19.62201	0.4300464	38.45914	0.842891	0.0152316	0.0000245	0.0391816	0.0025407	54.43812	0.9340895	20.82515	1.11989	37.72151	2.025895	37.65663	1.001299	0.0286799	0.0003756	0.0005268	5.80E-06	0.0000206	1.32E-06	0.0103376	0.0001957	0.0000626	1.40E-06	0.0063275	0.0000216	-3.60E-06	0.0000424
21541-01G	10-KTM-02	Ketumbeine	56c	15/04/2012	plag	25	2.057632	0.073605	0.3522421	0.0000597	0.00001	1.000471	3.81E-16	1.77E-14	0.0980841	0.0018165	6.061844	21.85953	0.297677	42.84468	0.5834469	0.0043834	0.0000171	0.0314105	0.0015504	46.33254	0.5434392	19.11551	0.6841843	40.61659	1.440871	37.68563	1.0013	0.0415704	0.0003699	0.0008972	6.78E-06	0.0000282	1.37E-06	0.0196128	0.0002218	0.000088	1.49E-06	0.0090437	0.0000222	0.0000578	0.0000424
21541-01H	10-KTM-02	Ketumbeine	56c	15/04/2012	plag	35	2.13349	0.2552906	0.439016	0.0000597	0.00001	1.000485	9.78E-17	5.62E-15	0.1333009	0.006168	4.752087	23.2892	0.7514072	45.64683	1.472758	0.0015235	0.0000428	0.0370399	0.0056233	57.40655	2.014317	19.82066	2.373116	33.95552	4.099025	37.71562	1.0013	0.0132231	0.0003681	0.0002303	4.89E-06	8.53E-06	1.28E-06	0.0053645	0.0001301	0.0000307	1.26E-06	0.0030401	0.0000222	-0.0000787	0.0000397
21539-01A	10-KTM-03	Ketumbeine	56c	14/03/2012	matrix	3	2.251692	0.1086252	0.1086768	0.0000598	8.89E-08	0.998789	6.24E-16	2.08E-13	1.04582	0.0054861	0.0680465	2.616669	0.124778	5.128672	0.2445648	0.0121823	7.09E-06	0.2144772	0.0029246	332.926	1.498677	20.88448	1.00813	6.261354	0.2601625	20.20087	1.001076	0.4889559	0.0001832	0.0014687	6.59E-06	0.000315	4.07E-06	0.003843	0.0001827	0.001536	4.22E-06	0.1084044	0.000027	0.0003594	0.0000282
21539-01B	10-KTM-03	Ketumbeine	56c	14/03/2012	matrix	5	2.158985	0.0155853	0.0159121	0.0000598	8.89E-08	0.99889	2.80E-15	1.29E-13	0.0873232	0.0004602	0.4577101	1.46977	0.03918	2.880749	0.0767929	0.0003355	2.23E-06	0.0288037	0.0004258	45.96012	0.0832442	20.02411	0.1446365	43.52359	0.2869111	20.21629	1.001077	0.3034015	0.0001344	0.0066014	0.0000113	0.0001901	2.80E-06	0.0097025	0.0002584	0.0005765	2.87E-06	0.0671646	0.0000233	0.0013995	0.000031
21539-01C	10-KTM-03	Ketumbeine	56c	14/03/2012	matrix	7	2.158916	0.0072687	0.0079453	0.0000598	8.89E-08	0.998991	4.08E-15	9.63E-14	0.0123839	0.0001878	2.201897	1.002833	0.0269603	1.965553	0.0528422	0.0020275	1.53E-06	0.0152052	0.000322	23.62643	0.0421515	20.02347	0.0674561	84.69242	0.2427343	20.23171	1.001077	0.2268341	0.0000971	0.0096009	0.0000162	0.000146	3.09E-06	0.0096281	0.0002586	0.0001189	1.79E-06	0.0501449	0.000022	0.0021188	0.0000273
21539-01D	10-KTM-03	Ketumbeine	56c	14/03/2012	matrix	9	2.171896	0.0098151	0.0103321	0.0000598	8.89E-08	0.9992881	2.60E-15	5.73E-14	0.0064271	0.0002677	3.395019	0.8025379	0.0272554	1.572974	0.0534206	0.0016208	1.55E-06	0.0139442	0.0002839	21.98717	0.0465487	20.14393	0.0910879	91.56741	0.3705523	20.27715	1.001078	0.1348432	0.0000721	0.0061328	0.0000123	0.0000855	1.73E-06	0.0049218	0.000167	0.0000394	1.64E-06	0.0300214	0.000023	0.0012942	0.0000282
21539-01E	10-KTM-03	Ketumbeine	56c	14/03/2012	matrix	12	2.116586	0.0181868	0.0184568	0.0000598	8.89E-08	0.9993889	1.30E-15	3.02E-14	0.0120999	0.0005311	2.593985	1.15426	0.0599221	2.26235	0.1174474	0.0050679	3.41E-06	0.0161936	0.0005658	23.13464	0.0651873	19.63063	0.168776	84.78679	0.6968472	20.2926	1.001078	0.0710433	0.0000703	0.0030709	8.01E-06	0.0000497	1.73E-06	0.0035446	0.0001839	0.0000372	1.63E-06	0.015845	0.0000225	0.0007058	0.0000273
21539-01F	10-KTM-03	Ketumbeine	56c	14/03/2012	matrix	17	1.997077	0.0378536	0.0379698	0.0000598	8.89E-08	0.9994906	6.66E-16	1.97E-14	0.0389675	0.0011411	4.271708	6.120107	0.1759961	11.99541	0.3449524	0.014163	0.00001	0.0242196	0.0005584	29.58075	0.1333151	18.52161	0.3512623	62.34276	1.148776	20.30818	1.001078	0.0463742	0.0000532	0.0015677	6.81E-06	0.000038	8.61E-07	0.0095946	0.0002729	0.0000611	1.77E-06	0.01039	0.0000236	0.0003034	0.0000264
21539-01G	10-KTM-03	Ketumbeine	56c	14/03/2012	matrix	25	2.254938	0.0961747	0.096233	0.0000598	8.89E-08	0.9997843	2.13E-16	6.84E-15	0.0414376	0.0028994	7.687439	11.71169	0.4346698	22.95492	0.8519529	0.0038073	0.0000247	0.0208896	0.0023223	32.16362	0.2950738	20.91461	0.8925803	64.48561	2.698348	20.35328	1.001079	0.0161029	0.0000488	0.0005007	4.33E-06	0.0000105	1.16E-06	0.0058635	0.0002117	0.0000207	1.44E-06	0.0034427	0.0000225	-8.50E-06	0.0000305
21539-01H	10-KTM-03	Ketumbeine	56c	15/03/2012	matrix	35	2.286423	0.1090271	0.10908	0.0000598	8.89E-08	0.9998845	1.87E-16	5.32E-15	0.0278058	0.0032761	10.09068	10.31573	0.4189624	20.21883	0.8211662	0.0024275	0.0000238	0.0178873	0.002257	28.51721	0.3026071	21.20682	1.011879	73.82135	3.455227	20.36868	1.001079	0.0125265	0.0000488	0.0004393	4.33E-06	7.86E-06	9.89E-07	0.0045313	0.0001785	0.0000122	1.43E-06	0.0026835	0.0000242	0.0000854	0.0000259
21550-01A	10-KTM-04	Ketumbeine	56d	15/04/2012	matrix	3	1.336247	0.1621696	0.1621898	0.0000604	1.16E-07	1.000642	5.06E-16	1.83E-13	1.173926	0.0137811	0.0468763	2.023468	0.1187294	3.965997	0.2327096	0.0043284	6.75E-06	0.2360691	0.0037858	362.6322	4.188077	12.26748	1.489358	3.37804	0.2726022	38.06765	1.001303	0.4318236	0.0005167	0.0011908	0.0000136	0.0002811	3.14E-06	0.0024096	0.0001386	0.0013979	3.54E-06	0.0942909	0.0000262	0.0002603	0.0000594
21550-01B	10-KTM-04	Ketumbeine	56d	15/04/2012	matrix	5	2.020693	0.0318636	0.0320979	0.0000604	1.16E-07	1.000655	1.80E-15	1.27E-13	0.1744384	0.0010556	0.31614	2.027792	0.0452113	3.974473	0.0886142	0.0060005	2.58E-06	0.0472428	0.000735	70.45291	0.3607335	18.5546	0.2927444	26.29846	0.3110288	38.09818	1.001304	0.2984127	0.0004502	0.0042356	0.0000204	0.0002001	2.95E-06	0.008589	0.0001868	0.0007389	2.69E-06	0.0643953	0.000025	0.0010364	0.00006
21550-01C	10-KTM-04	Ketumbeine	56d	15/04/2012	matrix	7	2.122681	0.0141108	0.0146853	0.0000604	1.16E-07	1.000669	2.70E-15	8.89E-14	0.0456632	0.0003115	1.13122	1.899416	0.032659	3.722856	0.0640117	0.0048095	1.86E-06	0.0224345	0.0003945	32.94725	0.09876	19.49163	0.1296498	59.08149	0.3507984	38.12884	1.001304	0.2092927	0.0004069	0.0063524	0.0000136	0.0001425	2.48E-06	0.0120658	0.0002056	0.0002901	1.88E-06	0.0458263	0.0000262	0.0014342	0.0000556
21550-01D	10-KTM-04	Ketumbeine	56d	15/04/2012	matrix	9	2.122633	0.0138755	0.0144593	0.0000604	1.16E-07	1.000682	2.63E-15	7.25E-14	0.0275542	0.0002688	1.566913	1.587651	0.0169185	3.111797	0.0331603	0.0019749	9.70E-07	0.0180381	0.0003441	27.56894	0.1028358	19.49119	0.1274879	70.62182	0.4671744	38.15946	1.001304	0.1708322	0.0005159	0.0061965	0.0000127	0.0001118	2.12E-06	0.009838	0.0001027	0.0001707	1.63E-06	0.0377899	0.0000256	0.0014845	0.0000546
21550-01E	10-KTM-04	Ketumbeine	56d	15/04/2012	matrix	12	2.126525	0.0152872	0.0158209	0.0000604	1.16E-07	1.000709	2.27E-15	6.79E-14	0.0353294	0.0003455	1.392329	1.808792	0.0388457	3.545232	0.0761375	0.0041764	2.21E-06	0.0202616	0.0003995	29.90535	0.1051447	19.52695	0.1404584	65.21339	0.4477349	38.21952	1.001305	0.1598097	0.000397	0.0053438	0.0000127	0.0001083	2.11E-06	0.0096659	0.0002061	0.0001888	1.79E-06	0.0347672	0.0000288	0.0013316	0.0000424
21550-01F	10-KTM-04	Ketumbeine	56d	15/04/2012	matrix	17	2.068074	0.0223975	0.0227453	0.0000604	1.16E-07	1.000723	1.75E-15	7.72E-14	0.0856094	0.0005352	1.414545	4.452476	0.0660338	8.726853	0.1294262	0.0080905	3.77E-06	0.0310319	0.0005875	44.1327	0.1685609	18.98991	0.2057808	42.89359	0.4180306	38.25043	1.001305	0.1818042	0.0004428	0.0041195	0.0000117	0.0001278	2.39E-06	0.0183419	0.0002667	0.0003527	1.96E-06	0.0386111	0.00003	0.0009434	0.0000384
21550-01G	10-KTM-04	Ketumbeine	56d	15/04/2012	matrix	25	1.915319	0.0375056	0.0376848	0.0000604	1.16E-07	1.000736	1.07E-15	6.51E-14	0.1479489	0.0010413	1.63585	8.898206	0.1097769	17.44048	0.2151627	0.0030347	6.28E-06	0.0409213	0.0008556	60.93226	0.2789194	17.5865	0.3445605	28.68012	0.5114242	38.28116	1.001305	0.1532972	0.0003964	0.0025159	9.31E-06	0.000103	2.11E-06	0.0223867	0.0002631	0.0003722	2.23E-06	0.0335292	0.0000273	0.0004906	0.0000424
21550-01H	10-KTM-04	Ketumbeine	56d	15/04/2012	matrix	35	1.85693	0.0914041	0.0914733	0.0000604	1.16E-07	1.00075	5.90E-16	1.12E-13	0.5840425	0.0037865	0.4288347	9.208332	0.1727444	18.04833	0.3385791	0.0123453	9.84E-06	0.1267589	0.0023696	190.5922	1.099387	17.05011	0.8396931	8.887321	0.351654	38.31172	1.001306	0.2648325	0.00042	0.0013895	7.63E-06	0.0001761	3.14E-06	0.0127952	0.0002293	0.0008115	2.78E-06	0.0563711	0.0000283	0.0004254	0.0000391
21571-01A	10-KTM-05	Ketumbeine	56e	17/04/2012	whole rock	3	1.342089	0.1289106	0.1289308	0.0000612	1.04E-07	1.001279	8.41E-16	3.78E-13	1.466902	0.0069625	0.0290005	1.564334	0.0924427	3.066094	0.1811877	0.007195	5.26E-06	0.2925952	0.0025783	450.0519	2.025503	12.16008	1.168436	2.698928	0.1882156	39.53054	1.001317	0.8907827	0.0007	0.0019793	8.69E-06	0.0005791	4.40E-06	0.0030963	0.0001822	0.0029034	5.10E-06	0.1916783	0.0000308	0.0002406	0.0000375
21571-01B	10-KTM-05	Ketumbeine	56e	17/04/2012	whole rock	5	2.258437	0.0144459	0.0149485	0.0000612	1.04E-07	1.001292	3.80E-15	1.69E-13	0.0811977	0.0003964	0.4501552	1.34414	0.0320535	2.634514	0.0628248	0.002469	1.82E-06	0.0283838	0.0003433	44.58636	0.1499558	20.4679	0.1310029	45.86306	0.2292091	39.56179	1.001317	0.3986609	0.0003949	0.0089413	0.0000283	0.0002538	2.95E-06	0.0120184	0.0002837	0.000726	2.69E-06	0.0867699	0.0000234	0.0017548	0.0000404
21571-01C	10-KTM-05	Ketumbeine	56e	17/04/2012	whole rock	7	2.256331	0.0060941	0.007203	0.0000612	1.04E-07	1.001318	5.75E-15	1.26E-13	0.0054174	0.0001094	5.509115	1.097574	0.0260087	2.151245	0.0509771	0.001074	1.48E-06	0.0135524	0.0001987	21.96211	0.0452632	20.4488	0.0552646	93.03977	0.2495111	39.62373	1.001318	0.297234	0.0004343	0.0135339	0.0000185	0.0001834	2.67E-06	0.0148545	0.0003509	0.0000733	1.48E-06	0.0667184	0.0000256	0.0031662	0.0000332
21571-01D	10-KTM-05	Ketumbeine	56e	17/04/2012	whole rock	9	2.232999	0.0066923	0.007696	0.0000612	1.04E-07	1.001332	4.86E-15	1.02E-13	0.0031671	0.000123	8.121078	0.94593	0.023565	1.854023	0.0461873	0.0032286	1.34E-06	0.0138751	0.0002109	21.09323	0.0488991	20.23722	0.0606883	95.88042	0.2805502	39.65552	1.001318	0.2413001	0.0003817	0.0114397	0.0000185	0.0001587	2.39E-06	0.0108211	0.0002686	0.0000362	1.41E-06	0.0524831	0.0000262	0.0027835	0.0000347
21571-01E	10-KTM-05	Ketumbeine	56e	17/04/2012	whole rock	12	2.161191	0.0085335	0.0092924	0.0000612	1.04E-07	1.001345	3.50E-15	7.34E-14	0.0049736	0.000161	5.821937	1.0649	0.0677492	2.087203	0.1327885	0.0041337	3.85E-06	0.0145247	0.0002704	20.97063	0.0615531	19.58605	0.0773821	93.32991	0.377519	39.68679	1.001318	0.1727293	0.0003764	0.0082367	0.0000156	0.0001196	2.21E-06	0.0087713	0.000557	0.000041	1.32E-06	0.0386635	0.0000239	0.0019723	0.0000339
21571-01F	10-KTM-05	Ketumbeine	56e	17/04/2012	whole rock	17	2.076881	0.0188264	0.0191554	0.0000612	1.04E-07	1.001358	1.59E-15	4.07E-14	0.0232134	0.0004193	2.748047	2.345609	0.0585387	4.597394	0.1147358	0.0058322	3.33E-06	0.0185148	0.0005213	25.53212	0.1250207	18.82153	0.1707106	73.59618	0.6949639	39.7181	1.001318	0.0958599	0.0003827	0.0037545	0.0000103	0.0000695	1.94E-06	0.0088066	0.0002181	0.0000872	1.56E-06	0.0210251	0.0000244	0.0010981	0.0000408
21571-01G	10-KTM-05	Ketumbeine	56e	17/04/2012	whole rock	19	1.997504	0.0975239	0.0975831	0.0000612	1.04E-07	1.001385	2.67E-16	8.84E-15	0.0516678	0.0021737	2.452745	4.659449	0.2890743	9.13252	0.5665857	0.0001181	0.0000164	0.0218425	0.0021653	33.09263	0.6624163	18.10179	0.8842707	54.52032	2.78426	39.77965	1.001319	0.0208074	0.0003676	0.0006288	5.77E-06	0.0000137	1.35E-06	0.0029297	0.0001795	0.0000325	1.33E-06	0.0047248	0.0000192	0.0000714	0.0000305
21571-01H	10-KTM-05	Ketumbeine	56e	17/04/2012	whole rock	25	1.570109	0.1689952	0.1690164	0.0000612	1.04E-07	1.001398	1.51E-16	5.97E-15	0.086952	0.0038657	2.354914	7.528433	0.5285882	14.75573	1.036033	0.0017838	0.00003	0.0289867	0.003699	39.50479	1.199264	14.22696	1.531954	35.82113	3.930642	39.81126	1.001319	0.0140573	0.0003693	0.0003558	5.30E-06	0.0000103	1.30E-06	0.0026789	0.0001835	0.0000309	1.30E-06	0.0033743	0.0000186	0.0001625	0.0000305
21571-01I	10-KTM-05	Ketumbeine	56e	17/04/2012	whole rock	35	1.457937	0.4146369	0.4146443	0.0000612	1.04E-07	1.001411	6.30E-17	7.00E-15	0.3303745	0.0141839	0.5553548	6.745737	0.8791469	13.22164	1.723128	-0.0174472	0.00005	0.0685157	0.0091951	111.2528	4.411027	13.21015	3.758481	11.81713	3.344991	39.84172	1.00132	0.0164936	0.0003678	0.0001483	4.83E-06	0.0000102	1.32E-06	0.0010001	0.000126	0.000049	1.36E-06	0.0035463	0.0000242	-0.0001126	0.0000312
21570-01A	10-KTM-05	Ketumbeine	56e	19/05/2012	plag	3	0.3930202	0.4825377	0.4825381	0.0000612	1.04E-07	1.00091	8.57E-17	5.28E-14	2.054119	0.1060025	0.030866	2.331302	1.100777	4.569352	2.157524	0.0445501	0.0000626	0.4167226	0.0228237	616.7461	31.67374	3.560046	4.371387	0.5762745	0.5738468	74.79383	1.001545	0.1244221	0.0002266	0.0002017	0.0000103	0.0000841	1.60E-06	0.0004703	0.0002206	0.0004144	2.27E-06	0.0295486	0.0000269	0.0000267	0.0000376
21570-01B	10-KTM-05	Ketumbeine	56e	19/05/2012	plag	5	0.5857435	0.756534	0.7565347	0.0000612	1.04E-07	1.000913	2.57E-17	6.93E-15	0.8913452	0.1255208	0.6520759	21.36888	5.57343	41.88301	10.92392	-0.068997	0.0003168	0.1564497	0.027405	269.6551	37.60636	5.306051	6.854297	1.937827	2.453346	74.85737	1.001546	0.0163245	0.0001745	0.0000605	8.39E-06	9.47E-06	1.01E-06	0.0012936	0.0002852	0.000054	1.20E-06	0.0039139	0.000022	-0.0001768	0.0000376
21570-01C	10-KTM-05	Ketumbeine	56e	19/05/2012	plag	7	0.8933441	0.4687971	0.4687996	0.0000612	1.04E-07	1.000918	4.02E-17	4.65E-15	0.3653438	0.0220488	1.48069	19.88859	2.639518	38.98165	5.173456	0.025188	0.00015	0.0893103	0.0112552	115.4594	6.067789	8.09319	4.248088	6.910478	3.588438	74.9844	1.001546	0.0109428	0.0001766	0.0000948	4.72E-06	8.46E-06	9.77E-07	0.001885	0.0002315	0.0000346	1.17E-06	0.0027909	0.0000191	-0.0000115	0.0000372
21570-01D	10-KTM-05	Ketumbeine	56e	20/05/2012	plag	9	1.840019	0.3466842	0.3466984	0.0000612	1.04E-07	1.00092	5.40E-17	3.74E-15	0.1844687	0.013872	3.982612	27.01015	2.868096	52.9399	5.621469	0.0062624	0.0001631	0.0482191	0.0072709	69.24478	4.347755	16.6739	3.143189	23.61745	4.224662	75.0475	1.001547	0.008809	0.0001777	0.0001272	7.54E-06	6.13E-06	8.49E-07	0.0034361	0.0003021	0.0000235	1.08E-06	0.0024675	0.0000191	-0.0000654	0.0000318
21570-01E	10-KTM-05	Ketumbeine	56e	20/05/2012	plag	12	1.934204	0.2821462	0.2821654	0.0000612	1.04E-07	1.000928	7.99E-17	1.29E-14	0.4875833	0.0235799	1.043534	18.70658	1.766278	36.66489	3.461904	-0.0073226	0.0001004	0.1013121	0.0079471	161.3733	7.532564	17.52784	2.558193	10.71726	1.423767	75.25469	1.001548	0.0303789	0.0001887	0.0001883	8.68E-06	0.0000191	1.21E-06	0.0035216	0.0002896	0.0000918	1.30E-06	0.0077111	0.0000205	-0.0001556	0.0000347
21570-01F	10-KTM-05	Ketumbeine	56e	20/05/2012	plag	17	2.461645	0.2515538	0.2515887	0.0000612	1.04E-07	1.000931	1.32E-16	3.04E-14	0.7011111	0.0130109	0.7226502	18.62746	1.013566	36.50983	1.98659	-0.007339	0.0000577	0.1417731	0.004812	229.8619	3.944092	22.3108	2.281481	9.577659	0.8708046	75.31849	1.001548	0.0716614	0.0003038	0.0003118	5.16E-06	0.0000442	1.31E-06	0.0058073	0.0003007	0.0002186	1.82E-06	0.0183571	0.0000192	-0.0001302	0.0000334
21570-01G	10-KTM-05	Ketumbeine	56e	20/05/2012	plag	25	2.290221	0.1609447	0.1609919	0.0000612	1.04E-07	1.000933	1.37E-16	9.36E-15	0.1673164	0.005874	4.038687	24.84365	1.228033	48.69356	2.406945	0.013169	0.0000699	0.0474384	0.0028603	68.33472	2.009593	20.75614	1.459559	29.83801	1.912624	75.38322	1.001548	0.022046	0.0002226	0.0003226	8.87E-06	0.0000153	8.19E-07	0.008015	0.0003284	0.000054	1.17E-06	0.0059115	0.0000186	-5.40E-06	0.0000368
21570-01H	10-KTM-05	Ketumbeine	56e	20/05/2012	plag	35	1.150985	0.8964127	0.8964148	0.0000612	1.04E-07	1.000938	2.61E-17	1.47E-14	1.860746	0.2353307	0.4494965	30.75028	5.47926	60.27055	10.73935	0.0026509	0.0003115	0.364476	0.0484548	563.3404	70.97308	10.42802	8.124161	1.810635	1.312754	75.51281	1.001549	0.0346836	0.0001769	0.0000616	7.73E-06	0.0000224	9.58E-07	0.0018932	0.0002385	0.0001146	1.40E-06	0.0085289	0.0000186	0.0000106	0.0000318
21554-01A	KTG-3	Ketumbeine	56d	17/04/2012	matrix	3	0.8687629	0.0909929	0.0910081	0.0000604	1.16E-07	1.001115	7.95E-16	2.11E-13	0.861678	0.0043157	0.0153947	0.4880267	0.0563996	0.9565323	0.1105432	0.0004475	3.21E-06	0.1756223	0.0018982	265.2387	1.214544	7.974689	0.8354577	3.005574	0.256986	39.15025	1.001313	0.4966672	0.0005665	0.0018725	8.23E-06	0.0003289	3.23E-06	0.0009138	0.0001054	0.0016135	3.83E-06	0.1067913	0.0000227	0.0004718	0.0000577
21554-01B	KTG-3	Ketumbeine	56d	17/04/2012	matrix	5	1.136753	0.0284209	0.0285043	0.0000604	1.16E-07	1.001129	3.00E-15	3.06E-13	0.3065508	0.0008821	0.019353	0.2184447	0.0218369	0.4281517	0.0428003	0.0073255	1.24E-06	0.0728085	0.0005895	101.9559	0.2259624	10.43545	0.260987	10.23374	0.1901402	39.18172	1.001314	0.7198026	0.0004599	0.0070599	0.0000146	0.000514	4.01E-06	0.0015422	0.000154	0.0021642	4.31E-06	0.1566578	0.000027	0.0014312	0.0000581
21554-01C	KTG-3	Ketumbeine	56d	17/04/2012	matrix	7	1.239373	0.0170558	0.0172204	0.0000604	1.16E-07	1.001142	5.15E-15	3.41E-13	0.1836916	0.000445	0.0255775	0.1730662	0.0121059	0.3392098	0.0237276	0.012568	6.88E-07	0.0513363	0.0004117	66.21525	0.1091766	11.37782	0.1566312	17.18116	0.1732288	39.21297	1.001314	0.80246	0.0005143	0.012119	0.0000175	0.0006221	4.89E-06	0.0020974	0.0001465	0.0022262	4.31E-06	0.1746309	0.0000311	0.0027705	0.0000573
21554-01D	KTG-3	Ketumbeine	56d	17/04/2012	matrix	9	1.261284	0.0127046	0.0129325	0.0000604	1.16E-07	1.001156	5.55E-15	2.53E-13	0.1136942	0.0004282	0.0423814	0.1774834	0.0112442	0.3478675	0.0220387	0.0121402	6.39E-07	0.0379241	0.0003335	45.5141	0.1360509	11.57904	0.1166736	25.43774	0.1976005	39.24463	1.001314	0.5948217	0.0004362	0.013069	0.0000373	0.0004956	4.11E-06	0.0023195	0.0001466	0.0014859	3.63E-06	0.1297748	0.0000262	0.0028061	0.0000581
21554-01E	KTG-3	Ketumbeine	56d	17/04/2012	matrix	12	1.249797	0.0107407	0.0110045	0.0000604	1.16E-07	1.001183	5.09E-15	1.76E-13	0.0772242	0.0002749	0.063004	0.1792083	0.0151395	0.3512482	0.0296733	0.0134359	8.61E-07	0.0314598	0.0002832	34.51819	0.0696499	11.47355	0.0986372	33.23558	0.2494586	39.30697	1.001315	0.4136894	0.0005007	0.0119847	0.0000185	0.000377	3.33E-06	0.0021478	0.0001812	0.0009255	2.97E-06	0.0892716	0.0000291	0.0023247	0.0000355
21554-01F	KTG-3	Ketumbeine	56d	17/04/2012	matrix	17	1.246137	0.0098177	0.010104	0.0000604	1.16E-07	1.001196	9.40E-15	3.88E-13	0.10001	0.000229	0.1241555	0.4568318	0.0125939	0.8953903	0.024684	0.0102513	7.16E-07	0.0346683	0.0002345	41.26384	0.0620942	11.43994	0.0901603	27.71535	0.1634792	39.33824	1.001315	0.9133782	0.0007248	0.0221351	0.0000263	0.0007674	5.09E-06	0.010112	0.0002782	0.0022137	4.31E-06	0.198932	0.0000322	0.0046343	0.000037
21554-01G	KTG-3	Ketumbeine	56d	17/04/2012	matrix	19	1.256854	0.0101063	0.0103894	0.0000604	1.16E-07	1.00121	6.87E-15	2.44E-13	0.0803732	0.0002716	0.1572928	0.4651161	0.0155632	0.9116277	0.0305039	0.0083119	8.85E-07	0.030278	0.0002412	35.49774	0.0620767	11.53836	0.0928115	32.49438	0.2190295	39.36939	1.001315	0.5740941	0.0004315	0.0161727	0.0000244	0.0004897	3.81E-06	0.0075222	0.0002511	0.0012999	3.92E-06	0.1245281	0.0000262	0.0034307	0.000034
21554-01H	KTG-3	Ketumbeine	56d	17/04/2012	matrix	25	1.246104	0.0083601	0.0086946	0.0000604	1.16E-07	1.001252	7.03E-15	2.09E-13	0.0614031	0.0002137	0.2592109	0.585492	0.0145489	1.147564	0.0285158	0.0093705	8.27E-07	0.0270433	0.000246	29.72363	0.0505539	11.43964	0.0767752	38.47157	0.2206431	39.46772	1.001316	0.4918427	0.0004498	0.0165472	0.0000224	0.0004475	4.01E-06	0.0096883	0.0002401	0.001016	3.25E-06	0.1073219	0.0000255	0.0034681	0.0000375
21554-01I	KTG-3	Ketumbeine	56d	17/04/2012	matrix	35	1.23346	0.0108551	0.0111095	0.0000604	1.16E-07	1.001265	3.61E-15	9.19E-14	0.047612	0.0002852	0.3411576	0.5975076	0.0224102	1.171115	0.0439239	0.0073225	1.27E-06	0.0237232	0.0003399	25.48831	0.0633328	11.32352	0.0996871	44.40868	0.3718098	39.49916	1.001317	0.2163774	0.0003727	0.0084893	0.0000146	0.0002014	2.86E-06	0.0050724	0.0001898	0.0004042	2.32E-06	0.0472053	0.0000228	0.0016413	0.0000361
21551-01A	KTG-4	Ketumbeine	56d	16/04/2012	matrix	3	1.611883	0.1631894	0.1632186	0.0000604	1.16E-07	1.000776	6.65E-16	2.87E-13	1.397511	0.0077154	0.034385	1.767001	0.07805	3.463322	0.1529779	0.0051313	4.44E-06	0.2787257	0.003101	431.9485	2.269291	14.7991	1.498952	3.421829	0.2298576	38.37186	1.001306	0.6766052	0.0007243	0.0015664	7.97E-06	0.0004366	4.30E-06	0.0027678	0.0001213	0.0021891	4.60E-06	0.1458084	0.0000316	-0.000014	0.0000382
21551-01B	KTG-4	Ketumbeine	56d	16/04/2012	matrix	5	1.906541	0.0334516	0.0336505	0.0000604	1.16E-07	1.00079	1.73E-15	1.44E-13	0.2209337	0.0009116	0.3209285	2.607093	0.2354875	5.109902	0.4615556	0.0062069	0.0000134	0.0561013	0.0007159	83.23539	0.2537313	17.50587	0.3073151	20.99296	0.2914923	38.40255	1.001306	0.3400289	0.0004795	0.0040851	0.0000107	0.0002292	2.85E-06	0.0106504	0.0009608	0.0009025	2.87E-06	0.0735877	0.0000228	0.0004624	0.0000397
21551-01C	KTG-4	Ketumbeine	56d	16/04/2012	matrix	7	2.096089	0.0192602	0.0196745	0.0000604	1.16E-07	1.000803	1.99E-15	8.02E-14	0.0710481	0.0004714	0.7658856	2.000871	0.0413299	3.921708	0.0810067	0.0057227	2.35E-06	0.0275557	0.0004568	40.2738	0.1353037	19.24731	0.1769595	47.72399	0.4016708	38.43325	1.001307	0.1888578	0.0004043	0.0046893	0.0000117	0.0001292	2.11E-06	0.0093828	0.0001922	0.0003332	2.05E-06	0.0404931	0.0000228	0.0008514	0.0000382
21551-01D	KTG-4	Ketumbeine	56d	16/04/2012	matrix	9	2.105268	0.0208282	0.0212153	0.0000604	1.16E-07	1.000845	1.83E-15	6.15E-14	0.0486112	0.0005036	0.9664959	1.727631	0.044867	3.386156	0.0879394	0.00489	2.55E-06	0.0230279	0.0004662	33.6841	0.196343	19.33164	0.1913672	57.32171	0.4835357	38.52958	1.001308	0.1449098	0.0003653	0.004302	0.0000224	0.0000991	1.93E-06	0.0074323	0.0001889	0.0002091	1.87E-06	0.0317686	0.000022	0.0008398	0.0000391
21551-01E	KTG-4	Ketumbeine	56d	16/04/2012	matrix	12	2.090729	0.0166475	0.0171227	0.0000604	1.16E-07	1.000859	2.04E-15	7.29E-14	0.0561628	0.0003923	0.8589291	1.773855	0.0349739	3.476756	0.0685488	0.0022428	1.99E-06	0.0235442	0.0004821	35.80127	0.1142834	19.19807	0.1529535	53.5574	0.4028967	38.56075	1.001308	0.1716341	0.0003864	0.0047941	0.0000104	0.0001129	2.29E-06	0.008504	0.0001665	0.0002692	1.79E-06	0.036856	0.0000227	0.0011791	0.0000383
21551-01F	KTG-4	Ketumbeine	56d	16/04/2012	matrix	17	2.047224	0.0210628	0.021425	0.0000604	1.16E-07	1.000873	2.26E-15	1.15E-13	0.1090292	0.0005527	1.232375	4.940212	0.1677445	9.682815	0.3287792	-0.0006493	9.54E-06	0.0324365	0.0002961	50.88899	0.1474607	18.79835	0.1935161	36.81068	0.3307511	38.59142	1.001308	0.2704427	0.0004133	0.0053144	0.0000127	0.0001724	1.51E-06	0.0262541	0.0008884	0.0005794	2.59E-06	0.0582065	0.000022	0.0012044	0.0000361
21551-01G	KTG-4	Ketumbeine	56d	16/04/2012	matrix	19	1.99203	0.0373134	0.0375081	0.0000604	1.16E-07	1.000886	9.94E-16	5.54E-14	0.1269763	0.0010001	1.111682	5.189936	0.1233325	10.17227	0.2417318	0.0027105	7.02E-06	0.0369858	0.0009151	55.71933	0.2835892	18.29126	0.3428087	32.70677	0.5835815	38.62187	1.001308	0.1303912	0.0004292	0.0023401	8.93E-06	0.0000866	2.11E-06	0.0121452	0.0002846	0.0002971	2.04E-06	0.0284663	0.000024	0.0003574	0.0000383
21551-01H	KTG-4	Ketumbeine	56d	16/04/2012	matrix	25	2.000138	0.0394188	0.0396046	0.0000604	1.16E-07	1.000912	9.57E-16	6.31E-14	0.1611443	0.0011392	1.093367	6.4779	0.1274255	12.69668	0.249754	0.0061049	7.25E-06	0.0445788	0.0010341	65.87503	0.3151488	18.36575	0.3621533	27.75158	0.5107653	38.68279	1.001309	0.1485139	0.0003942	0.0022545	8.84E-06	0.0001005	2.29E-06	0.0146043	0.0002812	0.0003633	2.13E-06	0.0323223	0.0000277	0.0005658	0.0000432
21551-01I	KTG-4	Ketumbeine	56d	16/04/2012	matrix	35	1.992831	0.0491815	0.0493295	0.0000604	1.16E-07	1.000926	6.81E-16	4.32E-14	0.1530282	0.0016443	1.14626	6.449233	0.1736708	12.6405	0.3403948	0.0100401	9.88E-06	0.044399	0.0011038	63.38737	0.5574216	18.29862	0.4518446	28.73588	0.6578644	38.71363	1.001309	0.1016945	0.000386	0.0016043	0.0000126	0.0000712	1.68E-06	0.0103467	0.0002661	0.0002455	1.79E-06	0.0220257	0.0000264	0.0003357	0.0000446
21553-01A	KTG-4B	Ketumbeine	56d	16/04/2012	matrix	3	1.13097	0.1544462	0.1544614	0.0000604	1.16E-07	1.000939	1.70E-15	7.11E-13	1.370246	0.0044676	0.0157469	0.7936063	0.0317207	1.555468	0.0621726	0.0006091	1.80E-06	0.2720392	0.0016612	419.482	1.563706	10.38234	1.418265	2.473647	0.2613382	38.74446	1.00131	1.675067	0.003717	0.0039932	0.0000117	0.0010863	5.77E-06	0.003169	0.0001262	0.0054716	7.66E-06	0.358006	0.0000655	0.0009229	0.0000497
21553-01B	KTG-4B	Ketumbeine	56d	16/04/2012	matrix	5	2.020392	0.0557192	0.0558536	0.0000604	1.16E-07	1.000953	2.98E-15	4.48E-13	0.4426031	0.0019693	0.0709693	1.155157	0.0367145	2.264107	0.0719605	0.0013835	2.09E-06	0.0965034	0.0007539	150.6092	0.6998758	18.55183	0.5119168	12.3078	0.2748651	38.77581	1.00131	1.055731	0.0023273	0.0070097	0.0000283	0.0006765	4.50E-06	0.0080973	0.000255	0.0031025	5.68E-06	0.2209208	0.0000374	0.0015927	0.0000453
21553-01C	KTG-4B	Ketumbeine	56d	16/04/2012	matrix	7	1.953839	0.0261327	0.0263995	0.0000604	1.16E-07	1.000979	2.53E-15	2.09E-13	0.2168357	0.0007404	0.1222425	0.9748368	0.0397596	1.91068	0.0779287	0.0077697	2.26E-06	0.05593	0.0005577	82.59882	0.195778	17.94039	0.2400835	21.70505	0.2281801	38.8367	1.00131	0.4919291	0.0004405	0.0059556	0.0000126	0.0003331	3.23E-06	0.0058058	0.0002362	0.0012914	3.44E-06	0.1068028	0.0000255	0.0013571	0.0000383
21553-01D	KTG-4B	Ketumbeine	56d	16/04/2012	matrix	9	1.919548	0.0262394	0.026496	0.0000604	1.16E-07	1.000993	1.91E-15	1.24E-13	0.1591476	0.000745	0.1387487	0.8121524	0.0187149	1.591819	0.0366811	0.0025777	1.06E-06	0.0432143	0.0006051	65.07301	0.2013369	17.62536	0.2410596	27.07018	0.3270589	38.86743	1.001311	0.29236	0.0004589	0.0044928	0.0000117	0.0001942	2.66E-06	0.0036488	0.0000835	0.000715	2.77E-06	0.0631273	0.0000214	0.0009652	0.0000361
21553-01E	KTG-4B	Ketumbeine	56d	16/04/2012	matrix	12	1.92651	0.0358383	0.0360279	0.0000604	1.16E-07	1.001006	1.62E-15	1.56E-13	0.2633102	0.0011319	0.1206065	1.167866	0.0601353	2.289017	0.1178652	0.0044538	3.42E-06	0.0635856	0.0009178	96.20756	0.2986846	17.68932	0.3292445	18.37149	0.2898681	38.89802	1.001311	0.3671932	0.0004291	0.0038167	0.0000108	0.0002427	3.43E-06	0.0044574	0.0002289	0.001005	3.25E-06	0.0781037	0.0000227	0.0007981	0.0000368
21553-01F	KTG-4B	Ketumbeine	56d	16/04/2012	matrix	17	1.030975	0.0807512	0.0807754	0.0000604	1.16E-07	1.001049	1.32E-15	3.52E-13	0.8619644	0.0033097	0.0975713	3.092352	0.0480401	6.061011	0.0941585	0.0049613	2.74E-06	0.1771273	0.0015389	266.5841	0.9359753	9.464117	0.7414895	3.542348	0.2020751	38.99595	1.001312	0.8290203	0.0007587	0.0031098	0.0000104	0.0005508	4.40E-06	0.0096166	0.0001457	0.0026805	5.00E-06	0.180511	0.0000386	0.0006938	0.0000523
21553-01G	KTG-4B	Ketumbeine	56d	16/04/2012	matrix	19	1.628189	0.125367	0.1254058	0.0000604	1.16E-07	1.001062	4.32E-16	1.29E-13	0.9549739	0.0070667	0.1373521	4.822672	0.2360124	9.452437	0.4625842	-0.0050286	0.0000134	0.1912375	0.0030914	299.6714	2.057783	14.94888	1.151551	4.971333	0.3333133	39.02692	1.001312	0.3046094	0.0004409	0.0010165	6.78E-06	0.0001944	2.85E-06	0.0049021	0.0002374	0.0009707	3.06E-06	0.0651541	0.0000298	0.0003876	0.0000574
21553-01H	KTG-4B	Ketumbeine	56d	16/04/2012	matrix	25	1.59067	0.1348829	0.1349173	0.0000604	1.16E-07	1.001075	4.23E-16	1.24E-13	0.9315781	0.007637	0.1577106	5.401791	0.2381507	10.58751	0.4667754	0.0134708	0.0000135	0.1931596	0.0031226	292.2887	2.233525	14.60426	1.238932	4.977343	0.3784787	39.05791	1.001312	0.2913203	0.0005209	0.0009967	7.36E-06	0.0001925	2.76E-06	0.0053839	0.0002337	0.0009285	3.25E-06	0.0629481	0.0000275	0.0004149	0.0000523
21553-01I	KTG-4B	Ketumbeine	56d	17/04/2012	matrix	35	1.31687	0.1214585	0.1214847	0.0000604	1.16E-07	1.001089	4.14E-16	1.09E-13	0.8459503	0.0067751	0.1728243	5.375358	0.1929447	10.5357	0.3781716	-0.007937	0.000011	0.1695522	0.0027382	264.2167	1.938676	12.08952	1.115457	4.558136	0.3775509	39.08923	1.001313	0.2574277	0.0003993	0.0009743	6.95E-06	0.0001652	2.39E-06	0.0052372	0.000184	0.0008242	2.96E-06	0.0553124	0.000028	0.000408	0.0000466
21537-01A	KTT-2	Ketumbeine	56c	14/03/2012	matrix	3	1.10976	0.0945335	0.2084956	0.0000597	0.00001	0.9973147	9.53E-16	2.14E-13	0.7170529	0.003489	0.0246993	0.6514598	0.0581027	1.276861	0.1138813	0.0221703	3.30E-06	0.1556998	0.0017252	224.3692	0.8860521	10.30702	0.8782606	4.591666	0.2955139	19.97723	1.001072	0.5033886	0.0003712	0.0022436	8.65E-06	0.0003493	3.64E-06	0.0014616	0.0001306	0.0016088	4.83E-06	0.1124076	0.0000283	0.0005284	0.0000286
21537-01B	KTT-2	Ketumbeine	56c	14/03/2012	matrix	5	1.298977	0.0266224	0.2191295	0.0000597	0.00001	0.9977051	2.46E-15	1.82E-13	0.2084678	0.0007928	0.0529292	0.405995	0.0363124	0.7957503	0.0711724	0.0192262	2.06E-06	0.0583179	0.0006595	74.27987	0.1819686	12.06503	0.2473607	16.23813	0.265308	20.03621	1.001073	0.4295215	0.0003119	0.0057825	0.0000132	0.0003372	3.75E-06	0.0023477	0.0002104	0.0012055	3.67E-06	0.0954851	0.0000269	0.0012659	0.0000301
21537-01C	KTT-2	Ketumbeine	56c	14/03/2012	matrix	7	1.31149	0.017695	0.2203126	0.0000597	0.00001	0.9978055	2.67E-15	1.10E-13	0.0972312	0.0005146	0.0735774	0.2633475	0.0269257	0.5161611	0.0527744	0.0172892	1.53E-06	0.0365764	0.0004595	41.19256	0.0899354	12.1813	0.1644133	29.56657	0.3581869	20.0514	1.001074	0.2589384	0.0002226	0.006286	0.0000123	0.0002299	2.86E-06	0.0016554	0.0001696	0.0006112	3.01E-06	0.057561	0.0000277	0.0012707	0.0000292
21537-01D	KTT-2	Ketumbeine	56c	14/03/2012	matrix	9	1.316754	0.014	0.220926	0.0000597	0.00001	0.997906	2.17E-15	5.66E-14	0.0465514	0.0004122	0.1449107	0.248339	0.0226916	0.4867444	0.0444756	0.0159436	1.29E-06	0.0265092	0.0004311	26.1093	0.0696242	12.23021	0.1300817	46.83532	0.4691626	20.06662	1.001074	0.1332237	0.0001441	0.0051025	0.0000123	0.0001353	2.18E-06	0.0012672	0.000116	0.0002375	2.02E-06	0.0299602	0.0000269	0.0010302	0.0000292
21537-01E	KTT-2	Ketumbeine	56c	14/03/2012	matrix	12	1.310798	0.0092434	0.2196795	0.0000597	0.00001	0.9980053	3.34E-15	7.00E-14	0.0294498	0.0002644	0.3097259	0.3356766	0.0269965	0.6579261	0.0529131	0.0119615	1.53E-06	0.0218918	0.0003165	20.93944	0.0472385	12.17487	0.0858856	58.13131	0.378967	20.08168	1.001074	0.1647506	0.0001344	0.007868	0.0000162	0.0001722	2.47E-06	0.0026411	0.0002128	0.0002317	2.02E-06	0.0367731	0.0000234	0.0017377	0.0000301
21537-01F	KTT-2	Ketumbeine	56c	14/03/2012	matrix	17	1.280864	0.0049358	0.2145312	0.0000597	0.00001	0.9982966	9.47E-15	1.74E-13	0.0220675	0.000131	0.9757927	0.7919973	0.0184692	1.552315	0.0361996	0.0103637	1.05E-06	0.0199233	0.0001961	18.41601	0.0259823	11.89673	0.0458602	64.56603	0.2227582	20.1259	1.001075	0.4107895	0.0002721	0.0223061	0.0000261	0.0004444	4.35E-06	0.0176664	0.0004121	0.0004922	2.86E-06	0.0912205	0.0000248	0.0048845	0.0000314
21537-01G	KTT-2	Ketumbeine	56c	14/03/2012	matrix	25	1.278351	0.0056428	0.2141282	0.0000597	0.00001	0.9983971	6.12E-15	1.09E-13	0.0203218	0.0001585	1.548945	1.157585	0.0259138	2.268867	0.050791	0.0097282	1.47E-06	0.0193585	0.0002281	17.8386	0.0270102	11.87339	0.0524288	66.50791	0.266209	20.14119	1.001075	0.2570133	0.0001056	0.0144077	0.0000202	0.0002789	3.27E-06	0.0166781	0.0003732	0.0002928	2.25E-06	0.0570461	0.0000228	0.0031302	0.0000305
21537-01H	KTT-2	Ketumbeine	56c	14/03/2012	matrix	35	1.267543	0.0110846	0.2125341	0.0000597	0.00001	0.9984968	2.30E-15	4.12E-14	0.0208766	0.0003295	1.571868	1.206773	0.0406209	2.365275	0.079617	0.0077536	2.31E-06	0.0187807	0.0003733	17.89953	0.042789	11.77297	0.1029903	65.71866	0.5508676	20.15636	1.001075	0.097109	0.0000681	0.0054252	0.0000123	0.0001019	2.02E-06	0.006547	0.0002202	0.0001133	1.77E-06	0.0215766	0.0000216	0.0011442	0.0000277
21586-01A	KTT-3	Ketumbeine	56f	15/05/2012	matrix	3	0.7138613	0.0385063	0.0385273	0.0000614	1.09E-07	1.000651	9.41E-16	3.18E-14	0.0916595	0.0019011	0.0775799	0.2617633	0.1051101	0.5130561	0.2060158	0.0132409	5.97E-06	0.0341247	0.0010243	33.7945	0.6135498	6.445792	0.3477604	19.07034	0.8925294	68.55866	1.001514	0.0748904	0.0002062	0.0022161	0.0000396	0.0000756	1.82E-06	0.0005801	0.0002325	0.0002031	2.12E-06	0.0194744	0.000051	0.0005964	0.0000332
21586-01B	KTT-3	Ketumbeine	56f	15/05/2012	matrix	5	1.242003	0.0117037	0.0119108	0.0000614	1.09E-07	1.000654	3.82E-15	7.40E-14	0.0274147	0.0002721	0.1553647	0.1569231	0.0272743	0.3075693	0.0534577	0.0109127	1.55E-06	0.0211517	0.0002933	19.38931	0.1099102	11.21627	0.1057304	57.84336	0.3723442	68.6162	1.001514	0.1743538	0.000191	0.0089923	0.0000489	0.0001902	2.41E-06	0.0014111	0.000245	0.0002465	2.04E-06	0.0422484	0.0000377	0.0022722	0.0000354
21586-01C	KTT-3	Ketumbeine	56f	15/05/2012	matrix	7	1.248909	0.0062483	0.0066322	0.0000614	1.09E-07	1.000662	7.12E-15	1.10E-13	0.0141048	0.000126	0.1845641	0.096039	0.0146937	0.1882365	0.0287996	0.0098516	8.35E-07	0.0182661	0.0002147	15.48264	0.0428782	11.27866	0.056447	72.84547	0.2684381	68.80147	1.001515	0.2595814	0.0002729	0.016766	0.0000389	0.0003062	3.51E-06	0.0016102	0.0002462	0.0002365	2.04E-06	0.0630685	0.0000255	0.0039358	0.0000484
21586-01D	KTT-3	Ketumbeine	56f	15/05/2012	matrix	9	1.248052	0.0059086	0.0063126	0.0000614	1.09E-07	1.000664	7.67E-15	1.13E-13	0.0114609	0.0001115	0.2357802	0.0996797	0.0141339	0.1953722	0.0277024	0.0111785	8.03E-07	0.0182225	0.0001887	14.6851	0.042094	11.27092	0.0533778	76.74896	0.2890508	68.85901	1.001516	0.2653838	0.0003922	0.0180716	0.0000399	0.0003293	3.31E-06	0.0018014	0.0002552	0.0002071	1.96E-06	0.0647457	0.0000269	0.0042262	0.0000472
21586-01E	KTT-3	Ketumbeine	56f	15/05/2012	matrix	12	1.24861	0.0075219	0.0078436	0.0000614	1.09E-07	1.000667	5.28E-15	8.35E-14	0.0152373	0.0001647	0.2907107	0.1631864	0.020583	0.3198453	0.0403427	0.011302	1.17E-06	0.0189781	0.0002271	15.81213	0.0537423	11.27596	0.0679523	71.30699	0.3194455	68.91642	1.001516	0.1965198	0.0001838	0.0124284	0.0000384	0.0002359	2.71E-06	0.0020281	0.0002556	0.0001894	1.96E-06	0.0480004	0.0000248	0.0027545	0.000049
21586-01F	KTT-3	Ketumbeine	56f	15/05/2012	matrix	17	1.260302	0.0103545	0.0105949	0.0000614	1.09E-07	1.000672	4.38E-15	9.10E-14	0.0315816	0.0002426	0.5654409	0.6568586	0.0281897	1.287443	0.0552517	0.0081476	1.60E-06	0.0209676	0.0002292	20.75423	0.0817111	11.38159	0.0935426	54.81609	0.3255621	69.03147	1.001517	0.2142813	0.0002062	0.0103247	0.0000379	0.0002165	2.21E-06	0.0067819	0.0002898	0.0003261	2.20E-06	0.0516957	0.0000327	0.0022025	0.0000591
21586-01G	KTT-3	Ketumbeine	56f	15/05/2012	matrix	25	1.260245	0.0128753	0.0130694	0.0000614	1.09E-07	1.000674	3.46E-15	8.05E-14	0.040232	0.000325	1.047614	1.549875	0.040803	3.037754	0.079974	0.0063294	2.33E-06	0.0219435	0.0003133	23.25705	0.1107632	11.38107	0.1163154	48.88357	0.3704217	69.08949	1.001517	0.1895495	0.000222	0.0081502	0.0000366	0.0001788	2.41E-06	0.0126318	0.0003274	0.0003279	2.20E-06	0.0457608	0.0000366	0.0016524	0.000055
21586-01H	KTT-3	Ketumbeine	56f	15/05/2012	matrix	35	1.239684	0.02258	0.0226876	0.0000614	1.09E-07	1.000682	1.40E-15	2.80E-14	0.0298715	0.0005988	1.422585	1.562638	0.0958026	3.06277	0.1877732	0.00849	5.45E-06	0.0207248	0.0005116	19.97662	0.2196046	11.19533	0.2039854	55.98186	0.8025995	69.2729	1.001518	0.0660437	0.0001521	0.0033061	0.0000353	0.0000685	1.52E-06	0.0051662	0.0003116	0.0000988	1.67E-06	0.0164878	0.0000208	0.0008188	0.0000361
21575-01A	KTW-2A	Ketumbeine	56e	16/05/2012	matrix	3	1.028169	0.0503758	0.0504062	0.0000612	1.04E-07	1.000715	1.12E-15	7.14E-14	0.1820703	0.0027224	-0.0070224	-0.0466741	0.0845683	-0.0914812	0.1657539	-0.0008967	4.81E-06	0.046395	0.0010305	63.6878	0.9221655	9.314974	0.456523	14.62664	0.6167989	70.04465	1.001522	0.1680201	0.0006629	0.0026382	0.0000366	0.0001224	2.11E-06	-0.0001231	0.0002229	0.0004803	2.64E-06	0.0391202	0.0000311	0.000306	0.0000725
21575-01B	KTW-2A	Ketumbeine	56e	16/05/2012	matrix	5	0.820962	0.0343032	0.0343317	0.0000612	1.04E-07	1.000723	1.58E-15	9.70E-14	0.1808426	0.002211	0.0278391	0.1854235	0.0660133	0.36343	0.1293861	0.0156531	3.75E-06	0.0518597	0.0009242	61.4234	0.7135741	7.4373	0.3108321	12.1068	0.3779037	70.2329	1.001523	0.2283453	0.0002729	0.0037176	0.0000428	0.0001928	2.61E-06	0.0006893	0.0002451	0.0006723	2.74E-06	0.0563822	0.0000262	0.000918	0.0000495
21575-01C	KTW-2A	Ketumbeine	56e	16/05/2012	matrix	7	0.9735916	0.0225652	0.022626	0.0000612	1.04E-07	1.000726	2.41E-15	9.64E-14	0.1042827	0.0009619	0.0612649	0.2352166	0.0414993	0.4610246	0.0813385	0.0173889	2.36E-06	0.0379482	0.0005664	39.94037	0.3260836	8.820383	0.2044874	22.08058	0.3928939	70.29168	1.001523	0.2270513	0.0003454	0.0056848	0.0000452	0.0002157	2.71E-06	0.0013371	0.0002355	0.0005928	2.74E-06	0.057953	0.0000328	0.0013859	0.0000422
21575-01D	KTW-2A	Ketumbeine	56e	16/05/2012	matrix	9	1.032214	0.0131226	0.0132398	0.0000612	1.04E-07	1.000728	4.16E-15	1.08E-13	0.0552984	0.0003547	0.0674235	0.1374061	0.0254208	0.2693159	0.0498247	0.0112689	1.44E-06	0.0265593	0.0003272	25.85296	0.118632	9.351631	0.1189222	36.16984	0.3676714	70.35173	1.001523	0.253525	0.0004588	0.0098064	0.0000404	0.0002605	3.01E-06	0.0013475	0.000249	0.0005423	2.66E-06	0.0620968	0.0000276	0.0022758	0.0000475
21575-01E	KTW-2A	Ketumbeine	56e	16/05/2012	matrix	12	1.238541	0.0119181	0.0121032	0.0000612	1.04E-07	1.000733	4.57E-15	1.13E-13	0.0453647	0.0002864	0.0935965	0.1564342	0.0233095	0.306611	0.0456867	0.0129806	1.32E-06	0.0252663	0.000296	24.75469	0.1056041	11.22155	0.108019	45.32725	0.3514492	70.47031	1.001524	0.2665521	0.0005166	0.0107677	0.0000398	0.0002721	3.01E-06	0.0016844	0.0002507	0.0004885	2.49E-06	0.0652732	0.0000264	0.0026348	0.0000544
21575-01F	KTW-2A	Ketumbeine	56e	16/05/2012	matrix	17	1.231093	0.0080328	0.0083017	0.0000612	1.04E-07	1.000736	6.60E-15	1.22E-13	0.024403	0.0001818	0.243324	0.2186345	0.0174036	0.4285236	0.0341111	0.0135697	9.89E-07	0.0214947	0.0002235	18.42225	0.0744834	11.15405	0.0728041	60.53948	0.2686053	70.52937	1.001524	0.2865018	0.0002302	0.0155519	0.0000602	0.0003343	3.21E-06	0.0034002	0.0002701	0.0003795	2.41E-06	0.0703377	0.0000277	0.0037378	0.0000549
21575-01G	KTW-2A	Ketumbeine	56e	17/05/2012	matrix	25	1.235516	0.004699	0.0051483	0.0000612	1.04E-07	1.000743	1.18E-14	2.08E-13	0.0217257	0.0000863	0.7558851	0.604086	0.0114864	1.184009	0.0225134	0.0086443	6.55E-07	0.0192733	0.0001364	17.62849	0.0282305	11.19414	0.0425893	63.4755	0.1666535	70.71639	1.001525	0.4888293	0.0003746	0.0277295	0.0000321	0.0005344	3.70E-06	0.016751	0.0003176	0.0006024	2.28E-06	0.119929	0.000032	0.006628	0.0000474
21575-01H	KTW-2A	Ketumbeine	56e	17/05/2012	matrix	35	1.23706	0.0059575	0.0063187	0.0000612	1.04E-07	1.000746	5.62E-15	9.19E-14	0.0174679	0.0001411	0.9175764	0.5896006	0.023178	1.155617	0.0454288	0.0076388	1.32E-06	0.0181203	0.0002071	16.37235	0.0327007	11.20813	0.0539949	68.43189	0.2812482	70.77576	1.001526	0.2164904	0.0002194	0.0132229	0.0000202	0.0002396	2.70E-06	0.0077962	0.000306	0.000231	1.83E-06	0.0526545	0.0000262	0.0031056	0.000051
21572-01A	KTW-3B	Ketumbeine	56e	18/04/2012	whole rock	3	1.298256	0.0534971	0.0535427	0.0000612	1.04E-07	1.001452	1.15E-15	1.60E-13	0.4256522	0.0019278	0.0211826	0.3318183	0.0254382	0.650364	0.0498588	0.0254278	1.45E-06	0.1016157	0.0011535	138.8378	0.5271766	11.76278	0.4848822	8.470367	0.2891446	39.93943	1.00132	0.3759799	0.0004808	0.0027081	9.53E-06	0.0002752	2.96E-06	0.0008986	0.0000687	0.0011527	3.26E-06	0.0823098	0.0000228	0.0005513	0.000035
21572-01B	KTW-3B	Ketumbeine	56e	18/04/2012	whole rock	5	1.276568	0.0119446	0.0121406	0.0000612	1.04E-07	1.001466	4.78E-15	1.67E-13	0.0782645	0.0002965	0.098674	0.2842538	0.0157145	0.5571375	0.0308005	0.0203566	8.93E-07	0.0340391	0.000294	34.91209	0.0689025	11.56621	0.1082607	33.1235	0.2653595	39.97095	1.001321	0.3927538	0.0004686	0.0112498	0.0000165	0.0003829	3.24E-06	0.0031978	0.0001765	0.0008805	3.07E-06	0.0865796	0.0000205	0.0022954	0.0000389
21572-01C	KTW-3B	Ketumbeine	56e	18/04/2012	whole rock	7	1.282541	0.0069571	0.0072916	0.0000612	1.04E-07	1.001479	6.40E-15	1.13E-13	0.020478	0.0001525	0.3031614	0.2285728	0.0107269	0.4480027	0.0210248	0.0158196	6.10E-07	0.0215264	0.0002359	17.71556	0.0557231	11.62034	0.0630565	65.58592	0.3116582	40.00252	1.001321	0.2667988	0.00044	0.0150601	0.0000393	0.0003242	3.43E-06	0.0034423	0.0001611	0.0003084	2.15E-06	0.0582176	0.0000184	0.0031144	0.0000389
21572-01D	KTW-3B	Ketumbeine	56e	18/04/2012	whole rock	9	1.294756	0.0083302	0.0086168	0.0000612	1.04E-07	1.001492	4.28E-15	7.11E-14	0.0164564	0.0001698	0.3585696	0.2172721	0.0133589	0.4258534	0.0261834	0.0145074	7.59E-07	0.0203122	0.0002819	16.62638	0.0649905	11.73106	0.0755019	70.549	0.4364446	40.03411	1.001321	0.1674759	0.0004406	0.0100729	0.0000283	0.0002046	2.77E-06	0.0021886	0.0001342	0.0001658	1.64E-06	0.0364898	0.0000191	0.0020697	0.000041
21572-01E	KTW-3B	Ketumbeine	56e	18/04/2012	whole rock	12	1.279942	0.0130731	0.0132534	0.0000612	1.04E-07	1.001519	2.65E-15	5.49E-14	0.0304424	0.0003112	0.2074514	0.2325125	0.0203266	0.4557245	0.0398402	0.0121211	1.16E-06	0.0221391	0.0003599	20.66711	0.0830174	11.59679	0.1184895	56.10493	0.5715238	40.09684	1.001322	0.1291645	0.0004122	0.0062498	0.0000146	0.0001384	2.22E-06	0.0014531	0.0001268	0.0001903	1.89E-06	0.0282368	0.0000239	0.001242	0.000041
21572-01F	KTW-3B	Ketumbeine	56e	18/04/2012	whole rock	17	1.28201	0.0122563	0.0124491	0.0000612	1.04E-07	1.001532	3.95E-15	9.52E-14	0.0421705	0.0002275	0.6416155	0.995083	0.0255231	1.950363	0.0500253	0.0063351	1.45E-06	0.0223354	0.0003124	24.11974	0.0940305	11.61553	0.1110864	48.1251	0.4564923	40.12872	1.001322	0.2241615	0.0007487	0.0092937	0.0000175	0.0002076	2.87E-06	0.009248	0.0002362	0.0003919	1.98E-06	0.0486301	0.000025	0.0018158	0.0000403
21572-01G	KTW-3B	Ketumbeine	56e	18/04/2012	whole rock	19	1.29969	0.0141588	0.0143306	0.0000612	1.04E-07	1.001546	2.25E-15	4.53E-14	0.0282606	0.000322	1.068494	1.110491	0.0390135	2.176561	0.0764664	0.0058911	2.22E-06	0.0195417	0.000429	20.11593	0.1152336	11.77578	0.1283313	58.49541	0.6045486	40.16052	1.001322	0.1066073	0.0003792	0.0052996	0.0000234	0.0001036	2.22E-06	0.0058852	0.0002048	0.0001498	1.57E-06	0.0233722	0.0000256	0.0010323	0.0000403
21572-01H	KTW-3B	Ketumbeine	56e	18/04/2012	whole rock	25	1.319586	0.012795	0.0129907	0.0000612	1.04E-07	1.001559	2.67E-15	5.86E-14	0.0339806	0.000309	1.700747	2.125051	0.0485772	4.1651	0.0952114	0.0054517	2.76E-06	0.0204329	0.0003851	21.91312	0.0769481	11.95611	0.1159713	54.48075	0.5204185	40.19233	1.001323	0.1379531	0.0003847	0.0062955	0.0000127	0.0001286	2.40E-06	0.0133782	0.0003041	0.0002139	1.90E-06	0.030298	0.0000239	0.0011822	0.0000382
21572-01I	KTW-3B	Ketumbeine	56e	18/04/2012	whole rock	35	1.279957	0.0190793	0.0192033	0.0000612	1.04E-07	1.001585	1.50E-15	2.90E-14	0.0266791	0.0004336	1.79678	1.762703	0.0732418	3.454899	0.1435539	0.0033282	4.16E-06	0.0183317	0.0005356	19.4066	0.1231534	11.59692	0.1729277	59.68489	0.9231233	40.25568	1.001323	0.0683232	0.0003788	0.0035206	0.0000104	0.0000645	1.87E-06	0.0062058	0.0002568	0.0000939	1.50E-06	0.0149324	0.00002	0.0009526	0.0000386
GELAI
21588-01A	10-GEL-01	Gelai	56f	16/05/2012	whole rock	3	0.7361895	0.0694949	0.0695072	0.0000614	1.09E-07	1.000685	4.76E-16	2.82E-14	0.1760097	0.0060913	0.0542722	0.3515245	0.1815679	0.688988	0.355873	0.0322964	0.0000103	0.0566762	0.0023193	59.17622	1.969336	6.647445	0.6276341	11.23063	0.926391	69.33072	1.001518	0.0663122	0.0001838	0.0011206	0.0000371	0.0000635	1.52E-06	0.0003939	0.0002029	0.0001972	1.96E-06	0.016901	0.0000294	0.0002549	0.0000368
21588-01B	10-GEL-01	Gelai	56f	16/05/2012	whole rock	5	1.016515	0.0264989	0.0265607	0.0000614	1.09E-07	1.000687	1.56E-15	5.44E-14	0.0859864	0.0011315	0.0520581	0.1649014	0.0631616	0.3232067	0.1237967	0.0230481	3.59E-06	0.0364353	0.0006414	34.84203	0.3946094	9.179365	0.2393588	26.34311	0.5389401	69.38891	1.001518	0.1281952	0.0002062	0.0036793	0.000041	0.0001341	1.82E-06	0.0006067	0.0002321	0.0003164	2.20E-06	0.0317199	0.0000294	0.0009936	0.0000444
21588-01C	10-GEL-01	Gelai	56f	16/05/2012	whole rock	7	1.112392	0.0165706	0.0166886	0.0000614	1.09E-07	1.000692	2.78E-15	6.78E-14	0.0480974	0.0004339	0.1159995	0.2054525	0.0399877	0.4026868	0.0783759	0.0222583	2.27E-06	0.0289814	0.0004756	24.39037	0.1573492	10.04543	0.1496864	41.1812	0.5164451	69.50554	1.001519	0.1596706	0.0004588	0.0065465	0.0000372	0.0001897	2.91E-06	0.001345	0.0002615	0.0003149	2.20E-06	0.0387986	0.0000311	0.0019043	0.0000347
21588-01D	10-GEL-01	Gelai	56f	16/05/2012	whole rock	9	1.095852	0.0135543	0.013694	0.0000614	1.09E-07	1.000695	3.85E-15	7.43E-14	0.0315221	0.0003631	0.2063621	0.2394852	0.0315813	0.469391	0.0618993	0.0222652	1.80E-06	0.0258414	0.0004217	19.28842	0.1723428	9.896014	0.1224382	51.2986	0.3857257	69.56344	1.001519	0.1750562	0.0002062	0.0090757	0.0000798	0.0002345	3.21E-06	0.0021735	0.0002858	0.0002861	2.12E-06	0.0437841	0.0000262	0.0024781	0.0000368
21588-01E	10-GEL-01	Gelai	56f	16/05/2012	whole rock	12	1.117628	0.0074976	0.0077572	0.0000614	1.09E-07	1.000703	5.19E-15	8.49E-14	0.0210238	0.0001747	0.3192277	0.2470743	0.0210487	0.4842656	0.0412555	0.0198231	1.20E-06	0.0230095	0.0002659	16.34954	0.0559849	10.09272	0.0677275	61.72275	0.31264	69.75038	1.00152	0.1998563	0.0001769	0.012224	0.0000388	0.0002813	3.11E-06	0.0030202	0.0002569	0.000257	1.97E-06	0.0492857	0.0000241	0.0030063	0.0000408
21588-01F	10-GEL-01	Gelai	56f	16/05/2012	whole rock	17	1.116075	0.0088538	0.0090741	0.0000614	1.09E-07	1.000705	5.17E-15	9.85E-14	0.0302715	0.0002129	0.7142841	0.7952759	0.0253693	1.558741	0.0497239	0.0189078	1.44E-06	0.0244241	0.0002688	19.04851	0.0678618	10.07869	0.0799792	52.88269	0.3190168	69.80888	1.001521	0.2320394	0.000247	0.0121815	0.0000398	0.0002975	3.11E-06	0.0096877	0.0003072	0.0003688	2.29E-06	0.0575088	0.0000256	0.002896	0.0000369
21588-01G	10-GEL-01	Gelai	56f	16/05/2012	whole rock	25	1.119347	0.0095957	0.0098005	0.0000614	1.09E-07	1.000708	6.38E-15	1.38E-13	0.0391218	0.0002131	1.009086	1.451703	0.0261853	2.845339	0.0513231	0.0163254	1.50E-06	0.0251841	0.0002648	21.6628	0.0732452	10.10825	0.0866804	46.61513	0.3058162	69.8676	1.001521	0.3253867	0.0005166	0.0150205	0.0000427	0.0003783	3.81E-06	0.0218053	0.000388	0.0005876	2.72E-06	0.0802704	0.0000226	0.0037513	0.0000441
21588-01H	10-GEL-01	Gelai	56f	16/05/2012	whole rock	35	1.126138	0.0142516	0.014392	0.0000614	1.09E-07	1.000713	2.66E-15	4.57E-14	0.0238644	0.0003404	1.208415	1.060555	0.0449507	2.078687	0.0881033	0.0120569	2.56E-06	0.0208368	0.0004297	17.20266	0.1344984	10.16959	0.1287392	59.07426	0.6035047	69.98556	1.001522	0.1077143	0.0002997	0.0062615	0.0000453	0.0001305	2.51E-06	0.0066407	0.0002771	0.0001494	1.83E-06	0.0255707	0.0000261	0.0011785	0.0000734
21587-01A	10-GEL-01	Gelai	56f	17/05/2012	plag	3	0.8007442	0.0674197	0.0674348	0.0000614	1.09E-07	1.000776	3.45E-16	1.68E-14	0.1391542	0.0021249	0.1418133	0.7258436	0.2985175	1.422653	0.5850943	0.0174686	0.000017	0.0445639	0.0015264	48.72135	0.4529327	7.230473	0.6089145	14.83302	1.217334	71.50537	1.001529	0.0396352	0.0001909	0.0008135	6.42E-06	0.0000363	1.21E-06	0.0005905	0.0002426	0.0001132	1.48E-06	0.0101619	0.0000206	0.0001885	0.0000427
21587-01B	10-GEL-01	Gelai	56f	17/05/2012	plag	5	1.061058	0.0388128	0.0388588	0.0000614	1.09E-07	1.000784	5.23E-16	1.08E-14	0.0375645	0.0010841	0.6795212	0.9387825	0.2055782	1.840014	0.4029332	0.0064607	0.0000117	0.0215082	0.0010125	20.71693	0.2803077	9.581722	0.3505961	46.22137	1.623633	71.69661	1.00153	0.0255043	0.0001762	0.0012311	0.0000142	0.0000265	1.21E-06	0.0011557	0.0002525	0.0000462	1.22E-06	0.0063541	0.0000297	0.000398	0.0000361
21587-01C	10-GEL-01	Gelai	56f	17/05/2012	plag	7	1.06388	0.0307549	0.0308131	0.0000614	1.09E-07	1.000787	6.27E-16	1.15E-14	0.0297212	0.0008305	0.8966592	0.9801018	0.1738963	1.921	0.3408368	0.0050221	9.88E-06	0.0195241	0.000757	18.39667	0.1493955	9.607212	0.277809	52.18816	1.513015	71.75667	1.00153	0.0271578	0.0001736	0.0014762	7.26E-06	0.0000288	1.11E-06	0.0014469	0.0002564	0.0000439	1.21E-06	0.0065858	0.0000287	0.0004432	0.0000361
21587-01D	10-GEL-01	Gelai	56f	17/05/2012	plag	9	1.076917	0.022386	0.022468	0.0000614	1.09E-07	1.000789	8.38E-16	1.31E-14	0.0199254	0.0005852	1.439131	1.054567	0.1300114	2.066951	0.2548223	0.002227	7.39E-06	0.016701	0.0006661	15.58267	0.1125375	9.724973	0.2022145	62.36493	1.315324	71.81755	1.001531	0.0307519	0.0001825	0.0019735	7.92E-06	0.000033	1.31E-06	0.0020812	0.0002562	0.0000393	1.14E-06	0.0076077	0.0000273	0.0004016	0.0000368
21587-01E	10-GEL-01	Gelai	56f	17/05/2012	plag	12	1.085603	0.0183154	0.0184171	0.0000614	1.09E-07	1.000794	1.15E-15	2.24E-14	0.0327869	0.0004897	0.5989525	0.722309	0.0980352	1.415726	0.192149	0.0058278	5.57E-06	0.0203934	0.0004884	19.53095	0.0949543	9.803432	0.1654448	50.17038	0.8276222	71.93737	1.001531	0.0528218	0.0001827	0.0027045	8.97E-06	0.0000552	1.31E-06	0.0019535	0.0002648	0.0000887	1.29E-06	0.0130245	0.000023	0.0007252	0.0000366
21587-01F	10-GEL-01	Gelai	56f	17/05/2012	plag	17	1.110888	0.0316392	0.031701	0.0000614	1.09E-07	1.000797	5.66E-16	8.71E-15	0.0181044	0.0008232	1.003702	0.6683985	0.189187	1.310061	0.3708064	0.0049389	0.0000108	0.0173067	0.0006523	15.37966	0.1602166	10.03184	0.2858047	65.19992	1.901636	71.99704	1.001532	0.0205027	0.0001789	0.0013331	7.44E-06	0.0000231	8.58E-07	0.000891	0.000252	0.0000241	1.09E-06	0.0051756	0.0000225	0.0004945	0.0000326
21587-01G	10-GEL-01	Gelai	56f	18/05/2012	plag	25	1.118636	0.0277231	0.0277945	0.0000614	1.09E-07	1.000805	6.13E-16	7.81E-15	0.009095	0.0007013	2.285065	0.7643964	0.1514645	1.498217	0.2968705	0.0042499	8.61E-06	0.0153579	0.0008413	12.75082	0.1430762	10.10182	0.2504305	79.1862	2.061325	72.19229	1.001533	0.0184003	0.0001795	0.0014431	7.82E-06	0.0000222	1.21E-06	0.0011031	0.0002183	0.0000131	1.01E-06	0.0047732	0.0000244	0.0004113	0.0000361
21587-01H	10-GEL-01	Gelai	56f	18/05/2012	plag	35	1.090053	0.0698267	0.0698537	0.0000614	1.09E-07	1.000807	2.35E-16	2.97E-15	0.0097868	0.0017971	3.632084	1.307182	0.4428691	2.562076	0.8680235	0.0057622	0.0000252	0.0159885	0.0014559	12.65146	0.3385428	9.84363	0.6307547	77.73827	5.279883	72.25277	1.001533	0.0069975	0.0001731	0.0005531	5.51E-06	8.84E-06	7.99E-07	0.000723	0.0002446	5.41E-06	9.92E-07	0.0018622	0.0000228	0.0001916	0.0000361
21768-01A	10-GEL-03	Gelai	58b	18/12/2012	matrix	3	1.374896	0.0676477	0.0677099	0.0000629	1.33E-07	1.000000	5.48E-16	2.01E-14	0.0824508	0.0014893	0.1748404	0.530322	0.1504705	1.039431	0.2949222	0.0085265	8.55E-06	0.0307431	0.0011485	36.68677	0.4921458	12.11305	0.5962139	33.00567	1.653002	83.52012	1.001585	0.0473778	0.0005462	0.0012914	8.86E-06	0.0000397	1.46E-06	0.0006849	0.0001943	0.0001065	1.78E-06	0.010962	0.0000469	0.0002671	0.0000762
21768-01B	10-GEL-03	Gelai	58b	18/12/2012	matrix	5	1.222142	0.0145236	0.0147509	0.0000629	1.33E-07	1.001715	2.62E-15	4.88E-14	0.0262408	0.0002995	0.1746793	0.1688513	0.0328574	0.3309486	0.0644005	0.0084102	1.87E-06	0.0200658	0.0003908	18.5883	0.0944607	10.76681	0.1279931	57.91775	0.7183954	83.75124	1.001586	0.1147998	0.000533	0.0061759	0.0000117	0.0001239	2.39E-06	0.0010428	0.0002026	0.0001621	1.82E-06	0.0254742	0.0000416	0.0014135	0.0000813
21768-01C	10-GEL-03	Gelai	58b	18/12/2012	matrix	7	1.154999	0.0074764	0.0078639	0.0000629	1.33E-07	1.001673	5.50E-15	7.80E-14	0.0134387	0.0001518	0.1682986	0.0834831	0.0156773	0.1636268	0.0307274	0.0091258	8.91E-07	0.0178901	0.0002241	14.18137	0.0477574	10.1751	0.0658852	71.74909	0.4960081	83.82464	1.001586	0.1837099	0.0005656	0.0129543	0.0000153	0.0002318	2.88E-06	0.0010815	0.0002027	0.0001741	1.96E-06	0.0407536	0.0000422	0.0026881	0.0000772
21768-01D	10-GEL-03	Gelai	58b	18/12/2012	matrix	9	1.103396	0.0057519	0.0062056	0.0000629	1.33E-07	1.001630	8.53E-15	1.18E-13	0.0136316	0.0001116	0.1526079	0.0768133	0.0101148	0.1505541	0.0198249	0.0139869	5.75E-07	0.0196031	0.0001823	13.78486	0.0417516	9.720362	0.0506865	70.51453	0.3590681	83.89928	1.001586	0.2770384	0.0006126	0.0200973	0.0000395	0.000394	3.56E-06	0.0015437	0.0002029	0.000274	2.18E-06	0.0621245	0.0000428	0.0043105	0.0000842
21768-01E	10-GEL-03	Gelai	58b	18/12/2012	matrix	12	1.110474	0.0042422	0.0048468	0.0000629	1.33E-07	1.001587	1.19E-14	1.44E-13	0.0076924	0.0000709	0.2895426	0.0822177	0.0077286	0.1611467	0.0151481	0.0182946	4.39E-07	0.0199629	0.0001813	12.07325	0.033202	9.782729	0.0373835	81.02813	0.2905724	83.97329	1.001587	0.3391476	0.0006157	0.0280908	0.0000554	0.0005608	4.94E-06	0.0023096	0.0002167	0.0002161	1.95E-06	0.0750163	0.0000434	0.0060366	0.0000879
21768-01F	10-GEL-03	Gelai	58b	18/12/2012	matrix	17	1.10252	0.004158	0.004765	0.0000629	1.33E-07	1.001502	1.24E-14	1.47E-13	0.0070321	0.0000698	0.449698	0.1165932	0.0074197	0.2285227	0.0145427	0.0186394	4.22E-07	0.0199552	0.0001341	11.80294	0.0319944	9.712639	0.0366407	82.2881	0.3041524	84.12053	1.001587	0.3459993	0.0006647	0.0293147	0.0000534	0.000585	3.76E-06	0.0034179	0.0002171	0.0002061	2.01E-06	0.0764493	0.0000402	0.0062919	0.0000615
21768-01G	10-GEL-03	Gelai	58b	18/12/2012	matrix	25	1.110526	0.0055917	0.0060632	0.0000629	1.33E-07	1.001459	6.72E-15	8.10E-14	0.0076627	0.0001097	0.6433597	0.1815764	0.0134452	0.3558897	0.0263527	0.0214362	7.64E-07	0.0210365	0.000209	12.05606	0.0372767	9.783192	0.049275	81.14179	0.4478673	84.19427	1.001588	0.1908482	0.0005269	0.0158301	0.00002	0.000333	3.27E-06	0.0028744	0.0002125	0.0001213	1.73E-06	0.0421678	0.0000397	0.0033559	0.0000736
21768-01H	10-GEL-03	Gelai	58b	18/12/2012	matrix	35	1.101714	0.013495	0.013694	0.0000629	1.33E-07	1.001417	2.60E-15	3.06E-14	0.0068815	0.0002639	1.004187	0.2543889	0.0339849	0.4986023	0.0666104	0.0237828	1.93E-06	0.0216947	0.0003943	11.73875	0.0900348	9.705542	0.1189208	82.66953	1.162224	84.26838	1.001588	0.0720012	0.0005249	0.0061336	0.0000134	0.0001331	2.39E-06	0.0015603	0.0002081	0.0000422	1.62E-06	0.0162047	0.0000381	0.0013118	0.0000575
21767-01A	10-GEL-03	Gelai	58b	05/01/2013	plag	3	1.126377	0.0522279	0.0522901	0.0000621	1.41E-07	1.000342	1.21E-15	1.88E-13	0.4884167	0.0019368	0.0373732	0.6714242	0.1566006	1.315991	0.3069372	0.0063889	8.90E-06	0.1069307	0.0010936	155.8404	0.4993801	10.05289	0.4662786	6.44771	0.2474869	120.2896	1.001716	0.4428629	0.0003517	0.0028418	8.72E-06	0.0003039	2.96E-06	0.001908	0.0004448	0.001388	3.47E-06	0.0978772	0.0000244	0.0006056	0.0000403
21767-01B	10-GEL-03	Gelai	58b	05/01/2013	plag	5	1.107868	0.0263448	0.0264638	0.0000621	1.41E-07	1.000315	2.26E-15	1.30E-13	0.1596458	0.0006667	0.0872738	0.512571	0.082734	1.004639	0.1621586	0.0042342	4.70E-06	0.0438921	0.0004746	57.51498	0.191701	9.887646	0.235198	17.18538	0.3797812	120.3959	1.001716	0.3067232	0.0007374	0.0053329	0.0000121	0.0002341	2.47E-06	0.0027335	0.000441	0.0008514	2.98E-06	0.0675816	0.0000213	0.0010362	0.0000403
21767-01C	10-GEL-03	Gelai	58b	06/01/2013	plag	7	1.10762	0.0214337	0.0215797	0.0000621	1.41E-07	1.00023	2.22E-15	1.28E-13	0.1600178	0.0007921	0.0706436	0.4159291	0.0844971	0.815221	0.1656143	0.0019388	4.80E-06	0.043175	0.000553	57.63238	0.2272692	9.885433	0.1913531	17.14771	0.2899387	120.7307	1.001717	0.3015751	0.0003353	0.0052327	0.0000197	0.0002259	2.76E-06	0.0021764	0.000442	0.0008373	2.69E-06	0.0671744	0.0000261	0.0011653	0.0000375
21767-01D	10-GEL-03	Gelai	58b	06/01/2013	plag	9	1.103716	0.0159636	0.0161576	0.0000621	1.41E-07	1.000203	2.02E-15	5.85E-14	0.064275	0.0004347	0.1249082	0.2954964	0.0932167	0.579173	0.1827047	0.0042177	5.30E-06	0.0258225	0.0004238	29.01839	0.0913601	9.850575	0.1425171	33.93967	0.4725417	120.839	1.001717	0.137718	0.000282	0.0047459	0.0000112	0.0001226	1.99E-06	0.0014024	0.0004423	0.000305	1.93E-06	0.030704	0.0000184	0.0009641	0.0000334
21767-01E	10-GEL-03	Gelai	58b	06/01/2013	plag	12	1.108167	0.0143403	0.0145578	0.0000621	1.41E-07	1.000175	3.00E-15	1.15E-13	0.0953084	0.0004505	0.1003571	0.3519816	0.0632327	0.6898839	0.1239361	0.0025292	3.59E-06	0.0311188	0.0004018	38.32001	0.1199189	9.890312	0.1280258	25.8038	0.2964092	120.9474	1.001718	0.2708108	0.000282	0.0070671	0.0000206	0.0002199	2.76E-06	0.0024875	0.0004467	0.0006736	2.50E-06	0.0599106	0.0000198	0.0015907	0.0000354
21767-01F	10-GEL-03	Gelai	58b	06/01/2013	plag	17	1.095678	0.0209009	0.0210474	0.0000621	1.41E-07	1.000148	3.38E-15	2.33E-13	0.198261	0.0005442	0.0483411	0.3526904	0.0562124	0.6912732	0.1101763	0.0002347	3.20E-06	0.049837	0.0004663	68.95116	0.1422334	9.778819	0.1865952	14.17883	0.2239965	121.0567	1.001718	0.5485019	0.0006511	0.0079549	0.000013	0.0003965	3.65E-06	0.0028056	0.0004471	0.0015772	3.47E-06	0.1213758	0.0000322	0.0018319	0.0000375
21767-01G	10-GEL-03	Gelai	58b	06/01/2013	plag	25	1.116114	0.010299	0.0106039	0.0000621	1.41E-07	1.000094	3.00E-15	6.79E-14	0.0425049	0.0002823	0.1912219	0.2991508	0.0627817	0.5863355	0.1230522	0.0005328	3.57E-06	0.0204263	0.0003423	22.62797	0.0813678	9.961263	0.0919462	44.01391	0.3708301	121.2715	1.001719	0.1599341	0.0002551	0.007068	0.0000226	0.0001444	2.37E-06	0.0021144	0.0004436	0.0003004	1.75E-06	0.0355313	0.0000212	0.0015391	0.0000312
21767-01H	10-GEL-03	Gelai	58b	06/01/2013	plag	35	1.132782	0.0195582	0.0197254	0.0000621	1.41E-07	1.000066	1.07E-15	1.99E-14	0.0281842	0.0004979	0.5170948	0.5361365	0.1740428	1.050828	0.341124	0.0059988	9.89E-06	0.0195877	0.0006862	18.47947	0.1465462	10.11007	0.1746119	54.69097	0.8978612	121.3806	1.001719	0.0467496	0.0002026	0.0025298	0.0000168	0.0000496	1.70E-06	0.0013563	0.0004402	0.0000713	1.17E-06	0.0104288	0.0000186	0.0006138	0.000032
21798-01A	10-GEL-04	Gelai	58d	09/09/2012	matrix	3	1.118571	0.0318868	0.0319726	0.0000631	1.32E-07	1.001343	1.79E-15	5.18E-14	0.0640858	0.0007728	0.0295271	0.0699005	0.0071066	0.137005	0.0139289	0.0135824	4.04E-07	0.029025	0.0007465	28.95346	0.2835147	9.822246	0.280087	33.9234	0.9542744	11.49152	1.000874	0.1219216	0.000811	0.004211	0.0000299	0.0001222	3.01E-06	0.0002943	0.0000298	0.0002699	2.62E-06	0.02772	0.0001109	0.0010639	0.0000429
21798-01B	10-GEL-04	Gelai	58d	09/09/2012	matrix	5	1.124283	0.0248743	0.0249853	0.0000631	1.32E-07	1.001354	3.83E-15	7.81E-14	0.0352261	0.0007042	0.0507712	0.0660847	0.0036353	0.129526	0.0071251	0.0084226	2.07E-07	0.021777	0.0012836	20.38619	0.3750326	9.87242	0.2184917	48.42639	0.6510207	11.50187	1.000874	0.1839369	0.0007627	0.0090226	0.000161	0.0001965	0.000011	0.0005963	0.000031	0.0003178	2.82E-06	0.042407	0.0001109	0.0020353	0.0000352
21798-01C	10-GEL-04	Gelai	58d	09/09/2012	matrix	7	1.114762	0.010392	0.0106506	0.0000631	1.32E-07	1.00143	5.96E-15	9.35E-14	0.0197474	0.000183	0.0872969	0.0637102	0.0022299	0.124872	0.0043706	0.0055146	1.27E-07	0.0178411	0.0010727	15.68067	0.0832054	9.788791	0.0912811	62.42581	0.6036357	11.56934	1.000877	0.2202269	0.0009419	0.0140445	0.000043	0.0002506	0.000015	0.0008948	0.0000312	0.0002773	2.42E-06	0.0508783	0.0000814	0.0031345	0.0000434
21798-01D	10-GEL-04	Gelai	58d	09/09/2012	matrix	9	1.125778	0.0080574	0.0083946	0.0000631	1.32E-07	1.001442	7.68E-15	9.93E-14	0.010239	0.0001252	0.1590124	0.0601897	0.0019415	0.1179719	0.0038053	0.0098196	1.10E-07	0.0175239	0.0010585	12.93844	0.0765476	9.885555	0.0707746	76.40539	0.3929997	11.57997	1.000877	0.2338773	0.0005472	0.0180762	0.0000974	0.0003168	0.000019	0.001088	0.0000345	0.0001851	2.03E-06	0.0555707	0.0000648	0.0042676	0.0000391
21798-01E	10-GEL-04	Gelai	58d	09/09/2012	matrix	12	1.116572	0.0044292	0.0050076	0.0000631	1.32E-07	1.001453	9.55E-15	1.13E-13	0.0068855	0.000091	0.2654295	0.0675242	0.0016121	0.1323474	0.0031598	0.020622	9.17E-08	0.0206131	0.0002396	11.85555	0.0297806	9.804688	0.038905	82.70215	0.3197173	11.59072	1.000877	0.2665902	0.0004603	0.0224865	0.0000393	0.0004635	5.31E-06	0.0015184	0.0000361	0.0001548	2.03E-06	0.0621112	0.0000493	0.0053095	0.0000408
21798-01F	10-GEL-04	Gelai	58d	09/09/2012	matrix	17	1.12667	0.004164	0.004785	0.0000631	1.32E-07	1.001477	9.07E-15	1.07E-13	0.0065715	0.0000818	0.9026678	0.2184151	0.0020848	0.4280936	0.0040861	0.0210308	1.19E-07	0.0206884	0.0002559	11.83715	0.0284546	9.893389	0.0365757	83.57113	0.3114475	11.61223	1.000878	0.252905	0.0004538	0.0213654	0.0000323	0.000442	5.41E-06	0.0046665	0.0000439	0.0001404	1.73E-06	0.0586062	0.000034	0.0049213	0.0000389
21798-01G	10-GEL-04	Gelai	58d	09/09/2012	matrix	25	1.118584	0.0062664	0.0066892	0.0000631	1.32E-07	1.001489	8.15E-15	9.11E-14	0.0046158	0.0000831	1.54098	0.2618346	0.0025667	0.5131957	0.0050308	0.0171522	1.47E-07	0.0189786	0.0002671	11.17832	0.055411	9.822364	0.0550431	87.8589	0.2810384	11.62307	1.000878	0.2144506	0.000292	0.0191845	0.0000905	0.0003641	4.81E-06	0.0050232	0.000043	0.0000886	1.54E-06	0.0494024	0.0000252	0.0043187	0.0000444
21798-01H	10-GEL-04	Gelai	58d	09/09/2012	matrix	35	1.122703	0.0093027	0.0095947	0.0000631	1.32E-07	0.0000115	4.00E-15	4.46E-14	0.0043586	0.0001353	1.355735	0.2175763	0.0041155	0.4264495	0.0080664	0.0186168	2.34E-07	0.0194367	0.0003746	11.14159	0.0790167	9.858548	0.0817135	88.47612	0.5016552	11.66764	1.00088	0.1050417	0.0002782	0.0094279	0.0000615	0.0001832	3.31E-06	0.0020513	0.0000363	0.0000411	1.25E-06	0.0244859	0.0000226	0.0022377	0.0000362
21801-01A	10-GEL-05	Gelai	58d	17/11/2012	matrix	3	1.364697	0.0722712	0.0723179	0.0000631	1.20E-07	0.9988478	3.36E-16	2.95E-14	0.2531787	0.0042272	0.0409329	0.3813367	0.0925279	0.7474199	0.1813546	0.0112667	5.26E-06	0.0640469	0.0020764	87.56924	1.302285	12.00104	0.6357875	13.70102	0.693821	45.73246	1.001369	0.0693481	0.0001192	0.0007919	0.0000117	0.0000507	1.47E-06	0.000302	0.0000732	0.0002005	1.56E-06	0.0151416	0.0000219	0.0000639	0.0000355
21801-01B	10-GEL-05	Gelai	58d	18/11/2012	matrix	5	1.132736	0.0174978	0.0176303	0.0000631	1.20E-07	0.9988002	1.82E-15	7.75E-14	0.1092078	0.0005987	0.0233647	0.094141	0.0160771	0.1845164	0.0315111	0.0029361	9.14E-07	0.0339035	0.0006131	42.56351	0.1464561	9.960554	0.153913	23.40045	0.34742	45.77255	1.001369	0.1825377	0.0001665	0.0042886	0.0000143	0.0001454	2.59E-06	0.0004037	0.000069	0.0004683	2.05E-06	0.0394328	0.0000219	0.0010714	0.000034
21801-01C	10-GEL-05	Gelai	58d	18/11/2012	matrix	7	1.137604	0.0103824	0.010606	0.0000631	1.20E-07	0.9986541	3.51E-15	1.00E-13	0.0622578	0.000348	0.0431873	0.099183	0.0083617	0.1943986	0.0163889	0.0061386	4.75E-07	0.0261106	0.0003593	28.58614	0.1014216	10.00338	0.0913247	34.99219	0.2880321	45.8958	1.00137	0.2364745	0.0001192	0.0082723	0.0000291	0.000216	2.88E-06	0.0008205	0.0000692	0.000515	2.24E-06	0.0509418	0.0000236	0.0019108	0.000041
21801-01D	10-GEL-05	Gelai	58d	18/11/2012	matrix	9	1.131805	0.007555	0.0078566	0.0000631	1.20E-07	0.9986059	5.39E-15	1.37E-13	0.0519489	0.0002327	0.042576	0.0816474	0.0061334	0.1600288	0.0120214	0.010421	3.49E-07	0.0256345	0.0002814	25.45835	0.0723364	9.952361	0.066455	39.09153	0.230957	45.93652	1.001371	0.3229861	0.0002444	0.0126868	0.0000348	0.0003252	3.47E-06	0.0010358	0.0000779	0.0006591	2.34E-06	0.0688796	0.0000242	0.0027332	0.0000375
21801-01E	10-GEL-05	Gelai	58d	18/11/2012	matrix	12	1.130813	0.0048564	0.0053126	0.0000631	1.20E-07	0.9985575	9.48E-15	1.71E-13	0.0272406	0.0001084	0.0897422	0.090208	0.0034888	0.1768078	0.0068381	0.0161757	1.98E-07	0.0229363	0.0001819	18.07071	0.0412121	9.943642	0.0427179	55.02491	0.2181837	45.97751	1.001371	0.4035761	0.000532	0.0223332	0.0000415	0.0005122	3.96E-06	0.0020146	0.0000779	0.0006084	2.14E-06	0.0860037	0.0000255	0.0049426	0.0000375
21801-01F	10-GEL-05	Gelai	58d	18/11/2012	matrix	15	1.126633	0.0037819	0.0043483	0.0000631	1.20E-07	0.9984606	1.03E-14	1.60E-13	0.0188964	0.0000874	0.1964777	0.1368288	0.0039456	0.2681845	0.0077333	0.0200148	2.24E-07	0.022677	0.0001758	15.53817	0.030902	9.906872	0.033266	63.755	0.178148	46.05954	1.001372	0.3769084	0.0002838	0.0242569	0.0000445	0.0005501	4.16E-06	0.003319	0.0000957	0.0004584	1.95E-06	0.0797459	0.0000262	0.0050009	0.0000375
21801-01G	10-GEL-05	Gelai	58d	18/11/2012	matrix	17	1.132583	0.0048679	0.0053245	0.0000631	1.20E-07	0.9984125	5.83E-15	8.60E-14	0.0160777	0.0001085	0.3496999	0.2070363	0.0073054	0.4057911	0.0143186	0.0216404	4.15E-07	0.0227005	0.0002451	14.7426	0.0417357	9.959206	0.0428188	67.5472	0.2301707	46.10031	1.001372	0.2024541	0.0001858	0.0137326	0.0000368	0.0003117	3.27E-06	0.0028431	0.0001002	0.0002208	1.37E-06	0.0430067	0.0000242	0.0027364	0.0000389
21801-01H	10-GEL-05	Gelai	58d	18/11/2012	matrix	25	1.125691	0.0053745	0.0057864	0.0000631	1.20E-07	0.9982631	5.32E-15	7.75E-14	0.0157194	0.0001309	0.5526001	0.3196907	0.0087609	0.6265938	0.0171713	0.0192617	4.98E-07	0.0218078	0.0002286	14.56507	0.0392928	9.898583	0.0472749	67.94892	0.2734104	46.22727	1.001373	0.182411	0.0001474	0.0125239	0.0000322	0.0002731	2.78E-06	0.0040038	0.0001094	0.0001969	1.56E-06	0.0388727	0.0000262	0.0028129	0.000032
21801-01I	10-GEL-05	Gelai	58d	18/11/2012	matrix	35	1.135847	0.009169	0.0094208	0.0000631	1.20E-07	0.9982155	1.99E-15	3.00E-14	0.0172397	0.0002396	0.6666579	0.4228681	0.0186678	0.8288214	0.0365889	0.0215279	1.06E-06	0.0228732	0.0004564	15.09924	0.0546835	9.987916	0.0806519	66.13165	0.4937789	46.26785	1.001373	0.0706173	0.0001056	0.0046769	0.0000155	0.000107	2.11E-06	0.0019777	0.0000872	0.0000806	1.09E-06	0.0151145	0.000023	0.0011025	0.0000333
21800-01A	10-GEL-06	Gelai	58d	07/09/2012	matrix	3	1.419658	0.0974762	0.0975126	0.0000631	1.18E-07	1.001074	1.03E-15	9.06E-14	0.2528118	0.0107783	0.0094645	0.0883	0.0087837	0.173068	0.0172161	0.0345959	4.99E-07	0.0720338	0.0034192	87.96509	3.716677	12.4802	0.8572501	14.1869	0.7321536	11.25475	1.000867	0.2134373	0.0008698	0.0024264	0.0001017	0.0001748	3.84E-06	0.0002142	0.0000193	0.0006134	4.32E-06	0.0490665	0.0002204	0.000674	0.0000425
21800-01B	10-GEL-06	Gelai	58d	08/09/2012	matrix	5	1.115672	0.0209491	0.0210534	0.0000631	1.18E-07	1.001086	3.73E-15	1.04E-13	0.0602202	0.000506	0.0222876	0.0496762	0.0023229	0.0973654	0.0045528	0.0161398	1.32E-07	0.0291751	0.0007892	27.78574	0.1718451	9.80704	0.1842044	35.29488	0.6279302	11.26489	1.000867	0.2443352	0.0009933	0.0087935	0.0000403	0.0002566	6.82E-06	0.0004368	0.0000203	0.0005295	3.72E-06	0.0564625	0.0002104	0.0020226	0.0000425
21800-01C	10-GEL-06	Gelai	58d	08/09/2012	matrix	7	1.116903	0.0105002	0.0107073	0.0000631	1.18E-07	1.001097	6.75E-15	1.19E-13	0.0263282	0.0002225	0.0397201	0.038779	0.0014757	0.0760069	0.0028923	0.0101876	8.39E-08	0.0207006	0.0002983	17.67704	0.0762825	9.81786	0.0923283	55.54087	0.5035458	11.27498	1.000867	0.2811658	0.0008792	0.0159057	0.0000457	0.0003293	4.63E-06	0.0006168	0.0000234	0.0004188	3.33E-06	0.0642385	0.0001904	0.0036679	0.0000408
21800-01D	10-GEL-06	Gelai	58d	08/09/2012	matrix	9	1.134948	0.0070551	0.0073695	0.0000631	1.18E-07	1.001121	9.51E-15	1.30E-13	0.0122287	0.0001129	0.0784912	0.0356205	0.0013334	0.0698163	0.0026135	0.0129262	7.58E-08	0.0189732	0.0002434	13.62574	0.0561458	9.976528	0.0620356	73.2202	0.4663432	11.29575	1.000868	0.3050774	0.0009837	0.0223898	0.0000551	0.0004248	5.33E-06	0.0007975	0.0000298	0.0002738	2.43E-06	0.0688723	0.0001011	0.0049632	0.0000372
21800-01E	10-GEL-06	Gelai	58d	08/09/2012	matrix	12	1.136614	0.0055278	0.005925	0.0000631	1.18E-07	1.001133	1.28E-14	1.49E-13	0.0054811	0.0000744	0.205234	0.0416888	0.0009343	0.08171	0.0018313	0.0168965	5.32E-08	0.0190634	0.0002307	11.62493	0.0493754	9.991181	0.0486064	85.94878	0.2360067	11.30595	1.000868	0.3501403	0.0003962	0.0301198	0.0001214	0.0005742	6.52E-06	0.0012557	0.0000276	0.0001651	2.14E-06	0.0799133	0.0000991	0.0067762	0.0000405
21800-01F	10-GEL-06	Gelai	58d	08/09/2012	matrix	17	1.122665	0.0059493	0.0063112	0.0000631	1.18E-07	1.001227	1.14E-14	1.26E-13	0.0042167	0.0000712	0.5868715	0.0913115	0.0013812	0.1789706	0.0027072	0.010023	7.87E-08	0.0164516	0.0011267	11.12034	0.0523995	9.868528	0.0523119	88.74289	0.3360571	11.38889	1.000871	0.2974244	0.0006218	0.026746	0.0001116	0.00044	0.00003	0.0024422	0.0000355	0.0001128	1.85E-06	0.0687357	0.0000322	0.0062294	0.0000446
21800-01G	10-GEL-06	Gelai	58d	08/09/2012	matrix	25	1.163815	0.005198	0.0056382	0.0000631	1.18E-07	1.001238	7.16E-15	8.03E-14	0.0033866	0.0000869	1.533658	0.1912845	0.0024072	0.3749177	0.004718	0.0175599	1.37E-07	0.0188891	0.0002381	11.22544	0.0387711	10.23036	0.0457074	91.12882	0.4225654	11.39913	1.000871	0.1891968	0.0004941	0.0168543	0.0000367	0.0003184	3.94E-06	0.003224	0.0000399	0.0000571	1.46E-06	0.0439317	0.0000295	0.0039155	0.0000417
21800-01H	10-GEL-06	Gelai	58d	08/09/2012	matrix	35	1.212884	0.0087203	0.0090124	0.0000631	1.18E-07	1.001331	3.15E-15	3.77E-14	0.0043594	0.0001559	1.034606	0.16615	0.0051817	0.3256541	0.0101561	0.0181464	2.95E-07	0.0192767	0.0004791	11.94958	0.0640011	10.66185	0.0766816	89.21833	0.6513961	11.48118	1.000874	0.0887353	0.0003456	0.0074258	0.0000268	0.0001431	3.51E-06	0.0012338	0.0000382	0.0000324	1.15E-06	0.0207557	0.0000269	0.0017129	0.0000456
21799-01A	10-GEL-06	Gelai	58d	17/11/2012	plag	3	1.142912	0.0121718	0.0123733	0.0000631	1.23E-07	0.9996163	1.55E-15	3.16E-14	0.034659	0.0003452	0.1017526	0.1299881	0.0219817	0.2547766	0.0430841	0.0048198	1.25E-06	0.0204246	0.0004739	20.37833	0.0620187	10.03956	0.1069532	49.263	0.5091652	45.09004	1.001364	0.0744059	0.0001	0.0036512	9.96E-06	0.0000746	1.72E-06	0.0004746	0.0000803	0.0001265	1.21E-06	0.0159521	0.0000248	0.0008326	0.0000375
21799-01B	10-GEL-06	Gelai	58d	17/11/2012	plag	5	1.109021	0.0071348	0.007454	0.0000631	1.23E-07	0.9994162	5.49E-15	1.34E-13	0.0493582	0.0002209	0.0558943	0.10176	0.0069385	0.1994496	0.0135995	0.0016243	3.94E-07	0.0221093	0.0002888	24.47238	0.0646725	9.741756	0.062692	39.80542	0.2307421	45.25644	1.001365	0.3162176	0.0001955	0.0129214	0.0000332	0.0002857	3.66E-06	0.0013149	0.0000896	0.0006378	2.34E-06	0.0665499	0.0000269	0.0028824	0.0000458
21799-01C	10-GEL-06	Gelai	58d	17/11/2012	plag	7	1.135868	0.0042891	0.0048251	0.0000631	1.23E-07	0.9993687	6.00E-15	7.72E-14	0.0097099	0.0000992	0.2983689	0.1068447	0.0054404	0.2094157	0.0106633	0.0021442	3.09E-07	0.0147751	0.000186	12.86844	0.0295828	9.977662	0.0376881	77.53424	0.2473622	45.29601	1.001366	0.1816673	0.0001474	0.0141173	0.0000303	0.0002086	2.59E-06	0.0015084	0.0000768	0.0001371	1.37E-06	0.038189	0.0000269	0.0030732	0.0000434
21799-01D	10-GEL-06	Gelai	58d	17/11/2012	plag	9	1.140475	0.0046338	0.0051379	0.0000631	1.23E-07	0.9993214	5.72E-15	7.55E-14	0.0106811	0.0001054	0.2484177	0.0978824	0.0057094	0.1918494	0.0111904	0.0025117	3.25E-07	0.0150862	0.0001821	13.1997	0.034936	10.01814	0.0407172	75.89549	0.2388108	45.3355	1.001366	0.1777306	0.0000906	0.0134647	0.000035	0.0002031	2.40E-06	0.001318	0.0000769	0.0001438	1.37E-06	0.0376279	0.0000256	0.0029148	0.0000396
21799-01E	10-GEL-06	Gelai	58d	17/11/2012	plag	12	1.139196	0.0038688	0.0044589	0.0000631	1.23E-07	0.9992284	7.54E-15	1.07E-13	0.0139938	0.0000875	0.2097888	0.1082636	0.0043402	0.2121966	0.0085069	0.0018931	2.47E-07	0.0155002	0.0001814	14.17676	0.0310436	10.00691	0.0339951	70.58478	0.1937615	45.41316	1.001367	0.2515952	0.0001761	0.017747	0.0000368	0.0002751	3.17E-06	0.0019214	0.000077	0.0002483	1.46E-06	0.0533295	0.0000244	0.0037457	0.0000433
21799-01F	10-GEL-06	Gelai	58d	17/11/2012	plag	15	1.135591	0.0041263	0.0046808	0.0000631	1.23E-07	0.999181	6.86E-15	8.92E-14	0.0101573	0.000088	0.2937155	0.1100141	0.004774	0.2156277	0.009357	0.0026145	2.71E-07	0.0150219	0.000164	12.99931	0.0322543	9.975229	0.0362576	76.73474	0.2215689	45.45279	1.001367	0.2099359	0.0001761	0.0161498	0.0000377	0.0002426	2.59E-06	0.0017767	0.0000771	0.000164	1.37E-06	0.0442998	0.000025	0.003352	0.0000369
21799-01G	10-GEL-06	Gelai	58d	17/11/2012	plag	17	1.14511	0.005205	0.0056619	0.0000631	1.23E-07	0.9990361	3.77E-15	4.64E-14	0.0075784	0.0001144	0.4095834	0.1144494	0.0091952	0.2243209	0.0180225	0.0028406	5.23E-07	0.014611	0.0002623	12.31248	0.0366027	10.05887	0.0457361	81.69458	0.3070304	45.5742	1.001368	0.1091847	0.0001192	0.0088678	0.0000246	0.0001296	2.30E-06	0.0010149	0.0000816	0.0000672	9.97E-07	0.0233512	0.0000228	0.0019034	0.0000334
21799-01H	10-GEL-06	Gelai	58d	17/11/2012	plag	25	1.137685	0.0043504	0.0048813	0.0000631	1.23E-07	0.9989886	5.72E-15	6.71E-14	0.0058024	0.0000823	0.5018016	0.1073788	0.0070278	0.2104625	0.0137744	0.0019643	3.99E-07	0.0139726	0.0002026	11.71754	0.0339002	9.993629	0.0382269	85.28638	0.2436636	45.61404	1.001368	0.1579325	0.0001569	0.0134783	0.0000367	0.0001883	2.69E-06	0.0014473	0.0000947	0.0000782	1.09E-06	0.0336634	0.0000228	0.0030097	0.0000342
21799-01I	10-GEL-06	Gelai	58d	17/11/2012	plag	35	1.136418	0.0093684	0.0096258	0.0000631	1.23E-07	0.9989411	1.63E-15	1.94E-14	0.006389	0.0002096	0.4971881	0.1171158	0.0178824	0.2295469	0.0350494	0.0010344	1.02E-06	0.0137627	0.00041	11.88069	0.0638595	9.98249	0.0823193	84.02081	0.5467604	45.65395	1.001368	0.0457136	0.000059	0.0038477	0.0000201	0.000053	1.56E-06	0.0004506	0.0000688	0.0000246	7.96E-07	0.009779	0.0000241	0.0009197	0.000035
21756-01A	10-GEL-10	Gelai	58a	07/01/2013	matrix	3	1.062544	0.0300519	0.0301291	0.0000615	1.25E-07	0.9996781	7.16E-16	2.08E-14	0.0653988	0.0008274	0.2086303	0.5019561	0.2608516	0.983834	0.5112692	0.0252535	0.0000148	0.0332808	0.001132	29.06078	0.1810571	9.57549	0.2709029	32.93892	0.923186	122.9333	1.001723	0.048992	0.0002146	0.0016858	7.45E-06	0.0000561	1.89E-06	0.0008462	0.0004399	0.0001103	1.31E-06	0.01132	0.0000228	0.0003128	0.0000326
21756-01B	10-GEL-10	Gelai	58a	07/01/2013	matrix	5	1.120312	0.0347678	0.034842	0.0000615	1.25E-07	0.9996507	7.21E-16	2.72E-14	0.0928286	0.0010143	0.5280803	1.802573	0.2703889	3.533044	0.5299622	0.0183873	0.0000154	0.0360583	0.001071	37.65719	0.2147474	10.09625	0.3134243	26.77709	0.817016	123.0437	1.001724	0.0639459	0.0002212	0.0016981	7.68E-06	0.0000612	1.80E-06	0.003061	0.0004591	0.0001576	1.57E-06	0.0148451	0.0000313	0.0004482	0.0000374
21756-01C	10-GEL-10	Gelai	58a	07/01/2013	matrix	7	1.130478	0.0265206	0.0266196	0.0000615	1.25E-07	0.9996232	9.36E-16	2.76E-14	0.0653689	0.0007874	0.8939041	2.148622	0.2234985	4.2113	0.438057	0.0143759	0.0000127	0.0294573	0.000836	29.51834	0.2140772	10.18789	0.2390793	34.46186	0.7788811	123.1546	1.001724	0.0650902	0.0002322	0.0022051	0.0000139	0.000065	1.80E-06	0.0047379	0.0004921	0.0001441	1.48E-06	0.0153558	0.000034	0.000496	0.000035
21756-01D	10-GEL-10	Gelai	58a	07/01/2013	matrix	9	1.166804	0.0234525	0.0235717	0.0000615	1.25E-07	0.9995959	9.42E-16	2.33E-14	0.0483799	0.0006169	1.174541	2.089455	0.2095799	4.095331	0.4107766	0.0106112	0.0000119	0.0249422	0.0007316	24.77748	0.1406894	10.51537	0.2114254	42.37739	0.8480408	123.2651	1.001724	0.0549757	0.0002323	0.0022188	8.40E-06	0.0000553	1.61E-06	0.004636	0.0004649	0.0001073	1.31E-06	0.0128506	0.0000236	0.0005648	0.0000311
21756-01E	10-GEL-10	Gelai	58a	07/01/2013	matrix	12	1.12918	0.0284554	0.0285474	0.0000615	1.25E-07	0.9995418	8.25E-16	1.90E-14	0.0436288	0.0006996	1.57779	2.531104	0.2510333	4.960963	0.4920254	0.0115255	0.0000143	0.0243391	0.0007878	22.981	0.1799323	10.17619	0.256521	44.20254	1.127978	123.4834	1.001725	0.044665	0.0002893	0.0019436	8.56E-06	0.0000473	1.52E-06	0.0049194	0.0004876	0.0000848	1.31E-06	0.0102737	0.0000227	0.0002768	0.0000332
21756-01F	10-GEL-10	Gelai	58a	07/01/2013	matrix	17	1.131374	0.0286243	0.0287161	0.0000615	1.25E-07	0.9995144	7.94E-16	2.01E-14	0.0519587	0.0007758	2.370689	4.528929	0.2650006	8.876701	0.5194011	0.0115197	0.0000151	0.0258345	0.0007702	25.3114	0.1566052	10.19597	0.2580434	40.15354	1.012102	123.5944	1.001725	0.0473045	0.0002168	0.0018689	7.76E-06	0.0000483	1.43E-06	0.0084641	0.0004943	0.0000971	1.39E-06	0.0106329	0.0000233	0.0003217	0.0000347
21756-01G	10-GEL-10	Gelai	58a	07/01/2013	matrix	25	1.063485	0.0198005	0.0199176	0.0000615	1.25E-07	0.9994869	1.40E-15	3.98E-14	0.0666033	0.0005394	4.867815	11.91991	0.1907231	23.36302	0.3738173	0.0080487	0.0000109	0.0271126	0.0005513	28.42372	0.11367	9.58397	0.1784915	33.43327	0.6089189	123.7059	1.001726	0.093617	0.0002554	0.0032936	9.57E-06	0.0000893	1.80E-06	0.0392597	0.000618	0.0002194	1.66E-06	0.0208011	0.0000208	0.0006253	0.0000318
21756-01H	10-GEL-10	Gelai	58a	07/01/2013	matrix	35	1.241803	0.0247647	0.0248924	0.0000615	1.25E-07	0.9994019	9.78E-16	3.18E-14	0.0755612	0.0007769	5.129085	14.24886	0.2995622	27.92776	0.587142	0.0014131	0.000017	0.0264274	0.0006807	32.48486	0.2281684	11.1915	0.2232634	34.10314	0.6373878	124.0508	1.001727	0.0747741	0.0002073	0.0023018	0.0000149	0.0000608	1.52E-06	0.0327982	0.0006567	0.0001739	1.39E-06	0.016194	0.0000212	0.0002691	0.0000412
21755-01A	10-GEL-13	Gelai	58a	06/01/2013	matrix	3	1.249122	0.0169607	0.0171666	0.0000614	1.30E-07	1.000039	1.21E-15	2.36E-14	0.0274149	0.0004179	0.2216083	0.2236914	0.152609	0.4384352	0.2991137	0.0030817	8.67E-06	0.0184487	0.000573	19.44902	0.1310991	11.28188	0.1532393	58.00032	0.7464726	121.4888	1.001719	0.0555699	0.0002127	0.0028572	0.0000158	0.0000527	1.61E-06	0.0006391	0.000436	0.0000783	1.11E-06	0.0125248	0.0000198	0.0006992	0.0000328
21755-01B	10-GEL-13	Gelai	58a	06/01/2013	matrix	5	1.139819	0.0045675	0.0051684	0.0000614	1.30E-07	0.9999536	6.20E-15	7.96E-14	0.008533	0.0000974	0.210882	0.0664884	0.0302526	0.1303172	0.0592951	0.0047536	1.72E-06	0.0154535	0.0001862	12.83723	0.0341818	10.29435	0.0412646	80.19199	0.2684261	121.8292	1.00172	0.1874314	0.0002193	0.0146006	0.0000344	0.0002256	2.67E-06	0.0009708	0.0004417	0.0001246	1.39E-06	0.0419232	0.0000198	0.0032234	0.000034
21755-01C	10-GEL-13	Gelai	58a	06/01/2013	matrix	7	1.121809	0.0036496	0.0043574	0.0000614	1.30E-07	0.9999258	9.52E-15	1.25E-13	0.0100858	0.00008	0.1587678	0.0592031	0.0198867	0.1160382	0.0389779	0.0077353	1.13E-06	0.0167762	0.0001654	13.13885	0.0265284	10.13165	0.032972	77.11299	0.2115771	121.9399	1.001721	0.2946309	0.000268	0.0224244	0.0000394	0.0003762	3.65E-06	0.0013276	0.000446	0.0002262	1.75E-06	0.0661557	0.0000198	0.0049934	0.0000347
21755-01D	10-GEL-13	Gelai	58a	06/01/2013	matrix	9	1.125485	0.0038561	0.0045358	0.0000614	1.30E-07	0.9998981	8.79E-15	1.07E-13	0.006693	0.0000729	0.2487938	0.0615514	0.0211986	0.1206407	0.0415492	0.011431	1.20E-06	0.0174076	0.0001572	12.15872	0.0306249	10.16486	0.0348373	83.60251	0.2335073	122.0507	1.001721	0.251765	0.0002964	0.0207065	0.0000453	0.0003605	3.16E-06	0.0012745	0.000439	0.0001386	1.48E-06	0.0559869	0.0000205	0.0046719	0.000034
21755-01E	10-GEL-13	Gelai	58a	06/01/2013	matrix	12	1.12238	0.0041155	0.004755	0.0000614	1.30E-07	0.9998706	7.57E-15	9.44E-14	0.0077949	0.0000846	0.2521021	0.0725789	0.0248339	0.1422546	0.0486744	0.0221671	1.41E-06	0.021318	0.0001883	12.45875	0.0311409	10.13681	0.0371805	81.3633	0.2529051	122.1607	1.001721	0.2221958	0.000268	0.0178345	0.0000384	0.0003802	3.25E-06	0.0012944	0.0004429	0.000139	1.48E-06	0.0498076	0.0000191	0.0038956	0.000034
21755-01F	10-GEL-13	Gelai	58a	06/01/2013	matrix	17	1.123944	0.0034824	0.0042209	0.0000614	1.30E-07	0.9998165	7.51E-15	9.53E-14	0.0085433	0.0000842	0.4262059	0.1341992	0.0253197	0.2630304	0.0496266	0.0301513	1.44E-06	0.0242105	0.0002304	12.69089	0.019754	10.15093	0.0314614	79.98275	0.2362728	122.3772	1.001722	0.2243375	0.000227	0.017677	0.0000197	0.000428	4.04E-06	0.0023722	0.0004477	0.000151	1.48E-06	0.0501084	0.0000226	0.0039729	0.0000375
21755-01G	10-GEL-13	Gelai	58a	06/01/2013	matrix	25	1.118709	0.0050464	0.0055769	0.0000614	1.30E-07	0.9997892	4.57E-15	5.87E-14	0.009279	0.0001224	0.5688605	0.1943936	0.0416418	0.3810115	0.081618	0.0300518	2.37E-06	0.0243132	0.000269	12.85799	0.0295561	10.10364	0.0455911	78.5721	0.3453851	122.487	1.001722	0.138335	0.0002149	0.0107587	0.0000177	0.0002616	2.86E-06	0.0020914	0.0004481	0.0000998	1.31E-06	0.0311858	0.0000219	0.0024535	0.000033
21755-01H	10-GEL-13	Gelai	58a	06/01/2013	matrix	35	1.115112	0.0116105	0.0118492	0.0000614	1.30E-07	0.9997618	1.62E-15	2.09E-14	0.0094695	0.0002825	0.8094168	0.2821262	0.1152373	0.5529674	0.2258652	0.0353297	6.55E-06	0.0261657	0.0004753	12.87464	0.0642857	10.07115	0.1048928	78.21329	0.861542	122.5968	1.001722	0.0491214	0.0002157	0.0038154	8.97E-06	0.0000998	1.80E-06	0.0010764	0.0004398	0.0000361	1.07E-06	0.0111859	0.0000188	0.0009006	0.0000389
21769-01A	10-GEL-14	Gelai	58b	19/12/2012	matrix	3	1.339168	0.0712123	0.0712953	0.0000633	1.63E-07	1.000808	5.00E-16	1.68E-14	0.0729858	0.0016421	0.0896149	0.2407957	0.1719601	0.4719595	0.3370417	0.0160387	9.77E-06	0.0315516	0.0012128	33.50174	0.5603651	11.72828	0.6239006	35.00273	1.875529	85.33334	1.001593	0.0394481	0.0005059	0.0011775	0.0000125	0.0000372	1.37E-06	0.0002835	0.0002023	0.0000859	1.70E-06	0.0089873	0.0000256	0.0003224	0.0000461
21769-01B	10-GEL-14	Gelai	58b	19/12/2012	matrix	5	1.201994	0.0221819	0.0223958	0.0000633	1.63E-07	1.000765	1.68E-15	3.47E-14	0.0342465	0.0004768	0.1876841	0.2366379	0.0524177	0.4638103	0.1027388	0.0090741	2.98E-06	0.0218091	0.0005148	20.73261	0.1444468	10.52653	0.1943242	50.76599	0.9747407	85.40967	1.001593	0.081777	0.0005139	0.0039444	0.0000116	0.000086	2.01E-06	0.0009334	0.0002066	0.0001351	1.84E-06	0.0184681	0.0000349	0.000952	0.0000523
21769-01C	10-GEL-14	Gelai	58b	19/12/2012	matrix	7	1.242279	0.0132552	0.0136339	0.0000633	1.63E-07	1.000722	2.98E-15	5.00E-14	0.019776	0.0002717	0.1782508	0.1299305	0.0288718	0.2546638	0.0565888	0.0137972	1.64E-06	0.0206999	0.0003629	16.77392	0.0972295	10.87945	0.1161244	64.85606	0.7076834	85.48553	1.001593	0.1178403	0.0005253	0.0070252	0.0000258	0.0001454	2.49E-06	0.0009128	0.0002027	0.0001389	1.84E-06	0.0263105	0.0000272	0.0016162	0.0000378
21769-01D	10-GEL-14	Gelai	58b	19/12/2012	matrix	9	1.174685	0.0108879	0.0112984	0.0000633	1.63E-07	1.000633	3.75E-15	5.76E-14	0.0169842	0.0002103	0.2182942	0.1366393	0.0234565	0.267813	0.0459747	0.016167	1.33E-06	0.0209878	0.0003388	15.34758	0.0739719	10.28729	0.095382	67.0253	0.6787987	85.64218	1.001594	0.1356244	0.0006119	0.0088369	0.0000143	0.0001855	2.97E-06	0.0012075	0.0002071	0.0001501	1.84E-06	0.0304732	0.0000276	0.0020109	0.0000456
21769-01E	10-GEL-14	Gelai	58b	19/12/2012	matrix	12	1.195187	0.0066911	0.0073619	0.0000633	1.63E-07	1.00059	5.78E-15	8.06E-14	0.0116889	0.0001363	0.3770619	0.1623698	0.0178378	0.3182448	0.0349621	0.0252293	1.01E-06	0.0231082	0.0002352	13.94364	0.0435373	10.46689	0.0586174	75.06085	0.4548087	85.71801	1.001594	0.1898812	0.000531	0.0136178	0.0000181	0.0003147	3.17E-06	0.0022111	0.0002428	0.0001592	1.84E-06	0.0420422	0.0000256	0.0029802	0.0000456
21769-01F	10-GEL-14	Gelai	58b	19/12/2012	matrix	17	1.166522	0.0042922	0.0052348	0.0000633	1.63E-07	1.000547	1.09E-14	1.42E-13	0.0094446	0.0000789	1.041787	0.3620679	0.0099086	0.7096531	0.0194209	0.0219978	5.63E-07	0.0215605	0.0001581	13.00471	0.032026	10.21578	0.0376014	78.53848	0.2850035	85.79499	1.001595	0.3352427	0.0005867	0.0257786	0.0000435	0.0005558	3.96E-06	0.0093336	0.0002548	0.0002435	1.99E-06	0.0736503	0.0000262	0.0057073	0.0000417
21769-01G	10-GEL-14	Gelai	58b	19/12/2012	matrix	25	1.163186	0.0045131	0.0054126	0.0000633	1.63E-07	1.000412	1.24E-14	1.56E-13	0.0082364	0.000069	1.869907	0.5665577	0.0096485	1.110453	0.0189111	0.0179034	5.49E-07	0.0199114	0.0001471	12.59664	0.0338247	10.18656	0.039536	80.83918	0.3621742	86.03477	1.001596	0.3673642	0.0009231	0.0291637	0.0000248	0.0005807	4.25E-06	0.0165229	0.0002809	0.0002402	2.00E-06	0.0817277	0.0000347	0.006485	0.0000615
21769-01H	10-GEL-14	Gelai	58b	20/12/2012	matrix	35	1.163847	0.0104406	0.0108602	0.0000633	1.63E-07	1.000369	3.59E-15	4.51E-14	0.0080492	0.000195	1.942855	0.575272	0.028911	1.127533	0.0566655	0.0131366	1.64E-06	0.0182318	0.0003347	12.54575	0.074871	10.19235	0.0914624	81.2128	0.7799933	86.11121	1.001596	0.1061055	0.0005183	0.0084575	0.0000287	0.0001542	2.78E-06	0.0048654	0.0002439	0.0000681	1.63E-06	0.0232016	0.0000255	0.0019323	0.0000402
21790-01A	10-GEL-14	Gelai	58c	20/12/2012	plag	3	1.013205	0.1637532	0.1637623	0.0000633	1.08E-07	1.000325	2.20E-16	1.47E-14	0.1947588	0.0053002	0.1860838	1.332738	0.383793	2.612167	0.7522342	0.0321303	0.0000218	0.0601321	0.0028007	66.91584	1.781251	8.874842	1.434745	13.25027	2.127519	86.18797	1.001596	0.0346221	0.0005373	0.0005174	0.0000112	0.0000311	1.28E-06	0.0006896	0.0001979	0.0001008	1.67E-06	0.0079004	0.0000306	0.0001149	0.0000419
21790-01B	10-GEL-14	Gelai	58c	20/12/2012	plag	5	1.060634	0.1340703	0.1340826	0.0000633	1.08E-07	1.000283	2.73E-16	1.81E-14	0.1914166	0.0041133	0.4911765	3.456925	0.3231658	6.775573	0.6334049	0.0191121	0.0000184	0.0549234	0.0024384	66.14643	1.357967	9.290397	1.174706	14.01083	1.759019	86.26427	1.001596	0.0425155	0.0005338	0.0006427	0.0000104	0.0000353	1.46E-06	0.0022219	0.0002045	0.000123	1.73E-06	0.0095493	0.0000236	0.0002253	0.0000378
21790-01C	10-GEL-14	Gelai	58c	20/12/2012	plag	7	1.134779	0.1639882	0.1639997	0.0000633	1.08E-07	1.000197	2.15E-16	1.24E-14	0.16044	0.0047405	0.8142931	4.803461	0.4338729	9.414784	0.8503909	0.0111252	0.0000247	0.0462445	0.0027237	57.42567	1.621362	9.940059	1.436902	17.25053	2.479626	86.41748	1.001597	0.0291089	0.0005247	0.0005069	0.000011	0.0000234	1.28E-06	0.0024349	0.0002134	0.0000813	1.63E-06	0.0063288	0.0000208	0.0004304	0.0000416
21790-01D	10-GEL-14	Gelai	58c	20/12/2012	plag	9	1.171869	0.2151343	0.2151436	0.0000633	1.08E-07	1.000154	1.62E-16	8.70E-15	0.1471351	0.0056612	0.7574775	4.097813	0.5494917	8.031714	1.077004	0.0178638	0.0000312	0.0460756	0.003583	53.83905	1.984962	10.26506	1.885093	19.01089	3.485718	86.49359	1.001597	0.0204923	0.0005285	0.0003806	0.00001	0.0000175	1.28E-06	0.0015597	0.000205	0.000056	1.57E-06	0.0045382	0.0000214	0.0004684	0.0000467
21790-01E	10-GEL-14	Gelai	58c	20/12/2012	plag	12	1.194793	0.143728	0.1437425	0.0000633	1.08E-07	1.000111	2.47E-16	9.11E-15	0.0896896	0.0032497	1.116753	3.682724	0.3663347	7.21814	0.718016	0.0110655	0.0000208	0.0328623	0.0020494	36.92233	1.125385	10.46593	1.259418	28.27212	3.431719	86.57018	1.001598	0.0214578	0.0005284	0.0005812	0.0000104	0.0000191	1.14E-06	0.0021403	0.0002094	0.0000521	1.64E-06	0.0047909	0.000022	0.0006258	0.0000467
21790-01F	10-GEL-14	Gelai	58c	20/12/2012	plag	17	1.251839	0.0934995	0.0935239	0.0000633	1.08E-07	0.9999792	3.91E-16	1.15E-14	0.0629406	0.0019408	1.866873	4.320262	0.2645474	8.467713	0.518513	0.0088981	0.000015	0.0270201	0.001331	29.37664	0.668287	10.9658	0.8193167	37.21454	2.850463	86.80602	1.001599	0.027051	0.0005477	0.0009208	9.54E-06	0.0000249	1.20E-06	0.0039782	0.0002401	0.000058	1.68E-06	0.0067498	0.0000319	0.0004091	0.0000552
21790-01G	10-GEL-14	Gelai	58c	20/12/2012	plag	25	1.187199	0.102073	0.1020931	0.0000633	1.08E-07	0.9999366	3.56E-16	1.05E-14	0.0659177	0.002107	2.907244	7.045871	0.3075052	13.80991	0.6027102	-0.0010933	0.0000175	0.0240282	0.0014459	29.45941	0.7021705	10.39939	0.8944122	35.12472	3.095832	86.88247	1.001599	0.0247076	0.0005419	0.0008387	7.82E-06	0.0000202	1.20E-06	0.0059094	0.000252	0.0000553	1.69E-06	0.0061949	0.0000314	0.0004381	0.0000552
21790-01H	10-GEL-14	Gelai	58c	20/12/2012	plag	35	1.356976	0.3206178	0.3206262	0.0000633	1.08E-07	0.999892	1.08E-16	2.50E-15	0.0395994	0.0060729	4.924993	7.170437	0.9002315	14.05406	1.764454	-0.0065707	0.0000512	0.0171471	0.0039991	23.06964	2.215077	11.88712	2.809671	51.26601	12.92956	86.96247	1.001599	0.0058889	0.0005428	0.0002553	6.91E-06	4.38E-06	1.01E-06	0.0018304	0.0002244	0.0000101	1.53E-06	0.0020686	0.0000324	0.0002656	0.0000516
21803-01A	10-GEL-19	Gelai	58d	16/11/2012	matrix	3	1.142	0.0962395	0.0962516	0.0000631	8.43E-08	1.0002370	2.98E-16	3.51E-14	0.3610492	0.007304	0.0769354	1.021562	0.1451401	2.002262	0.2844746	0.0280129	8.25E-06	0.0902369	0.0026469	117.7584	2.251886	10.03504	0.8459486	8.515583	0.690489	44.57765	1.00136	0.0825968	0.0002022	0.0007014	0.0000133	0.0000633	1.42E-06	0.0007165	0.0001009	0.0002532	1.78E-06	0.0176723	0.0000291	0.0003521	0.0000456
21803-01B	10-GEL-19	Gelai	58d	16/11/2012	matrix	5	1.234417	0.0511455	0.051172	0.0000631	8.43E-08	1.0001900	8.51E-16	8.82E-14	0.3109998	0.002764	0.0649589	0.7430606	0.0539639	1.456399	0.1057692	0.0292262	3.07E-06	0.0811822	0.0014523	103.6497	0.8443319	10.84741	0.4495932	10.45999	0.4120829	44.6164	1.00136	0.2076571	0.0004011	0.0020035	0.0000158	0.0001626	2.61E-06	0.0014887	0.0001075	0.0006231	2.53E-06	0.0438132	0.0000322	0.0005858	0.0000462
21803-01C	10-GEL-19	Gelai	58d	16/11/2012	matrix	7	1.23373	0.0214287	0.0214919	0.0000631	8.43E-08	1.0001430	1.73E-15	8.23E-14	0.1236554	0.0008097	0.1308506	0.5951984	0.0266197	1.166589	0.0521746	0.0244559	1.51E-06	0.0440416	0.0006065	47.71389	0.2365075	10.84137	0.1883684	22.71234	0.3684971	44.65527	1.00136	0.1939083	0.0002419	0.004064	0.0000195	0.000179	2.31E-06	0.0024189	0.0001075	0.0005025	2.24E-06	0.0411152	0.000033	0.0010547	0.0000427
21803-01D	10-GEL-19	Gelai	58d	16/11/2012	matrix	9	1.14697	0.020677	0.0207337	0.0000631	8.43E-08	1.0000480	2.31E-15	1.29E-13	0.153018	0.0008766	0.0857652	0.4828181	0.0211795	0.9463235	0.0415117	0.0235922	1.20E-06	0.0493125	0.0008749	55.72949	0.2504282	10.07873	0.181752	18.07911	0.3024421	44.73352	1.001361	0.3030537	0.0001825	0.0054379	0.0000242	0.0002682	4.60E-06	0.0026255	0.0001146	0.0008321	3.01E-06	0.0641212	0.000024	0.0012175	0.0000347
21803-01E	10-GEL-19	Gelai	58d	16/11/2012	matrix	12	1.188431	0.0181167	0.0181861	0.0000631	8.43E-08	1.0000000	3.53E-15	1.92E-13	0.1470471	0.0005717	0.0780044	0.422035	0.0207448	0.8271885	0.0406598	0.0196584	1.18E-06	0.046827	0.000601	54.31622	0.1511305	10.44318	0.1592504	19.22111	0.2766241	44.77264	1.001361	0.4517046	0.0005808	0.0083162	0.0000204	0.0003894	4.90E-06	0.0035097	0.0001723	0.0012229	3.69E-06	0.0959133	0.0000248	0.0018347	0.0000362
21803-01F	10-GEL-19	Gelai	58d	17/11/2012	matrix	15	1.199729	0.0170205	0.0170958	0.0000631	8.43E-08	0.9998536	3.95E-15	2.00E-13	0.1348958	0.0006259	0.0962011	0.477432	0.0128699	0.9357667	0.025225	0.0173998	7.32E-07	0.0437433	0.0004395	50.78209	0.2012835	10.54248	0.1496156	20.75349	0.2753896	44.89358	1.001362	0.4719505	0.0007206	0.0092936	0.0000339	0.0004065	3.81E-06	0.0044371	0.0001185	0.0012537	3.59E-06	0.1000687	0.000024	0.0020804	0.000044
21803-01G	10-GEL-19	Gelai	58d	17/11/2012	matrix	17	1.206833	0.0139982	0.0140907	0.0000631	8.43E-08	0.9998062	2.89E-15	1.16E-13	0.0991795	0.0005132	0.2065395	0.7534377	0.019762	1.476738	0.0387335	0.0147245	1.12E-06	0.0360413	0.0003764	40.15478	0.1457956	10.60493	0.1230491	26.39646	0.2826996	44.93276	1.001363	0.2734948	0.0001628	0.006811	0.0000244	0.0002455	2.41E-06	0.0051317	0.0001334	0.0006755	2.53E-06	0.0579034	0.000022	0.0015394	0.0000453
21803-01H	10-GEL-19	Gelai	58d	17/11/2012	matrix	25	1.18316	0.0079372	0.008093	0.0000631	8.43E-08	0.9997588	4.55E-15	1.15E-13	0.0505576	0.0002314	0.8406738	1.562922	0.017477	3.063326	0.034255	0.0097943	9.94E-07	0.0250945	0.0002649	25.35608	0.0402042	10.39684	0.0697698	40.95893	0.2614006	44.97199	1.001363	0.2714639	0.000114	0.0107061	0.0000162	0.0002687	2.81E-06	0.0167327	0.0001854	0.0005413	2.34E-06	0.0574829	0.000022	0.002376	0.0000453
21803-01I	10-GEL-19	Gelai	58d	17/11/2012	matrix	35	1.193749	0.0100412	0.0101669	0.0000631	8.43E-08	0.9996637	2.51E-15	4.88E-14	0.0304857	0.0002792	1.521219	1.705308	0.0294765	3.342404	0.0577739	0.0070912	1.68E-06	0.020353	0.000348	19.44274	0.0782571	10.48992	0.0882646	53.88942	0.4008802	45.05076	1.001364	0.1148159	0.0001018	0.0059053	0.0000232	0.0001202	2.00E-06	0.0100704	0.0001696	0.00018	1.49E-06	0.0242599	0.0000228	0.0014027	0.0000418
21802-02A	10-GEL-20	Gelai	58d	24/10/2012	matrix	3	0.5798605	0.1137216	0.1474234	0.0000618	0.00001	0.9977379	4.93E-16	9.33E-14	0.6167664	0.0143602	0.0921955	2.090887	0.0972359	4.098138	0.1905823	0.0149847	5.53E-06	0.1341593	0.0123898	189.1975	4.312047	5.201753	1.020326	2.7453	0.5088191	28.20589	1.001196	0.2197112	0.0003282	0.0011613	0.0000266	0.0001558	0.000014	0.0024281	0.0000987	0.0007162	3.58E-06	0.0525506	0.0000544	0.0002538	0.0000376
21802-02B	10-GEL-20	Gelai	58d	24/10/2012	matrix	5	1.080491	0.0392252	0.1791323	0.0000618	0.00001	0.9975941	1.31E-15	8.63E-14	0.1888392	0.0014808	0.2168705	1.505981	0.0360055	2.951722	0.0705709	0.0296438	2.05E-06	0.0581458	0.0008014	65.9514	0.4078475	9.694103	0.3520321	14.68328	0.5074282	28.23117	1.001196	0.2030965	0.0004554	0.0030795	0.0000179	0.0001791	2.25E-06	0.0046376	0.0001079	0.0005815	3.09E-06	0.0469174	0.0000496	0.0005051	0.0000449
21802-02C	10-GEL-20	Gelai	58d	24/10/2012	matrix	7	1.173648	0.0266537	0.1917113	0.0000618	0.00001	0.9965985	1.61E-15	6.37E-14	0.0973899	0.0008585	0.3112176	1.114649	0.0310753	2.184712	0.0609076	0.023608	1.77E-06	0.0387508	0.0005707	39.51361	0.2107787	10.53017	0.2392199	26.62885	0.5798822	28.40676	1.001198	0.1500651	0.0003138	0.0037978	0.0000188	0.0001472	2.06E-06	0.0042332	0.0001166	0.0003699	2.71E-06	0.0345073	0.0000592	0.0006243	0.0000361
21802-02D	10-GEL-20	Gelai	58d	24/10/2012	matrix	9	1.160162	0.0260003	0.1894612	0.0000618	0.00001	0.9964541	1.33E-15	4.06E-14	0.0676922	0.0007125	0.4057256	1.010055	0.0330913	1.979707	0.0648589	0.0242977	1.88E-06	0.0333652	0.0006376	30.53392	0.1711845	10.40914	0.2333532	34.06671	0.7517402	28.43232	1.001199	0.0955041	0.0003612	0.0031278	0.0000132	0.0001044	1.96E-06	0.0031593	0.000103	0.0002117	2.05E-06	0.0224996	0.000034	0.0006858	0.0000347
21802-02E	10-GEL-20	Gelai	58d	25/10/2012	matrix	12	1.151657	0.0307369	0.1888119	0.0000618	0.00001	0.9960137	1.10E-15	3.07E-14	0.0593115	0.0007656	0.4954968	1.080797	0.0415222	2.118362	0.0813834	0.0123586	2.36E-06	0.0276572	0.0035775	27.94881	0.2029319	10.3328	0.2758635	36.94297	0.9880169	28.5104	1.0012	0.0722136	0.0004251	0.0025838	0.0000114	0.0000715	9.31E-06	0.0027925	0.000107	0.0001532	1.86E-06	0.0172058	0.0000262	0.0006849	0.0000361
21802-02F	10-GEL-20	Gelai	58d	25/10/2012	matrix	15	1.15339	0.0293705	0.1888711	0.0000618	0.00001	0.9958702	1.07E-15	3.13E-14	0.0636702	0.00083	1.20104	2.811745	0.0496087	5.511019	0.0972331	0.0062146	2.82E-06	0.0262942	0.00063	29.11257	0.1773463	10.34835	0.2635996	35.47579	0.8860912	28.5359	1.0012	0.0736834	0.0002798	0.002531	0.0000123	0.0000666	1.57E-06	0.0071165	0.0001213	0.0001611	1.95E-06	0.017594	0.0000294	0.0006853	0.0000361
21802-02G	10-GEL-20	Gelai	58d	25/10/2012	matrix	17	1.015195	0.0322936	0.1673703	0.0000618	0.00001	0.9957262	9.35E-16	2.94E-14	0.076343	0.0009308	1.834981	5.150625	0.0673368	10.09522	0.1319802	0.0055926	3.84E-06	0.0283863	0.0006819	31.45392	0.2019489	9.108102	0.2898128	28.85158	0.8987166	28.56151	1.0012	0.0692824	0.0002725	0.0022027	0.0000114	0.0000625	1.48E-06	0.0113451	0.0001371	0.0001682	1.86E-06	0.0168247	0.000027	0.0004816	0.0000347
21802-02H	10-GEL-20	Gelai	58d	25/10/2012	matrix	25	1.048059	0.0266641	0.1716241	0.0000618	0.00001	0.9952803	1.70E-15	6.57E-14	0.1005209	0.000794	2.393131	8.844437	0.059637	17.3351	0.1168885	0.0076659	3.44E-06	0.0335329	0.0005246	38.64282	0.1623402	9.403042	0.2392964	24.18064	0.5772929	28.64093	1.001201	0.1546037	0.0002981	0.0040008	0.000015	0.0001342	2.06E-06	0.0353852	0.0002001	0.0004022	2.80E-06	0.0370228	0.0000283	0.0009761	0.0000383
21802-02I	10-GEL-20	Gelai	58d	25/10/2012	matrix	35	1.052359	0.0383298	0.1744973	0.0000618	0.00001	0.9951352	9.38E-16	3.71E-14	0.1037	0.0011312	2.530438	9.647627	0.0946501	18.90935	0.1855141	0.0068305	5.42E-06	0.0338146	0.0007674	39.55986	0.2325361	9.441633	0.3439906	23.70341	0.8331277	28.66683	1.001202	0.087359	0.000286	0.0022083	0.0000109	0.0000747	1.67E-06	0.0213046	0.0001821	0.000229	2.23E-06	0.0212421	0.0000227	0.0004946	0.0000403
MERU
22036-01A	MR2	Meru	60E	12/03/2013	matrix	3	0.1365586	0.0600249	0.0600254	0.0000622	1.10E-07	1.002487	6.68E-16	7.73E-15	0.0348421	0.0013822	0.4634252	0.5939602	0.0463238	1.164162	0.0907946	0.0122924	2.63E-06	0.0230172	0.0008604	11.57218	0.3440341	1.216021	0.534527	10.50434	4.624269	35.03707	1.001274	0.0181919	0.0005309	0.001572	6.05E-06	0.0000362	1.34E-06	0.0009337	0.0000726	0.0000548	2.16E-06	0.0039974	0.00002	0.0181919	0.0005309
22036-01B	MR2	Meru	60E	12/03/2013	matrix	5	0.1116146	0.0226501	0.022651	0.0000622	1.10E-07	1.002487	1.80E-15	1.19E-14	0.0189242	0.0005259	0.6052063	0.4213994	0.0185548	0.8259429	0.0363673	0.0059156	1.05E-06	0.0178089	0.0004213	6.611047	0.1271103	0.993894	0.2016986	15.03093	3.059093	35.05988	1.001274	0.0280553	0.0005313	0.0042437	8.08E-06	0.0000756	1.77E-06	0.0017883	0.0000785	0.0000803	2.23E-06	0.0061472	0.0000206	0.0280553	0.0005313
22036-01C	MR2	Meru	60E	12/03/2013	matrix	7	0.0585241	0.0144053	0.0144056	0.0000622	1.10E-07	1.002487	2.88E-15	1.06E-14	0.010625	0.0003372	0.7263871	0.2840764	0.0121042	0.5567898	0.0237242	0.0015379	6.88E-07	0.0147322	0.0002928	3.671406	0.08018	0.5211314	0.1282746	14.19417	3.503051	35.10567	1.001274	0.0248584	0.0005337	0.0067708	0.0000172	0.0000997	1.96E-06	0.0019234	0.0000816	0.0000719	2.28E-06	0.0054598	0.00002	0.0248584	0.0005337
22036-01D	MR2	Meru	60E	12/03/2013	matrix	9	0.0495778	0.0166829	0.0166831	0.0000622	1.10E-07	1.002487	2.42E-15	6.75E-15	0.0079517	0.0003832	0.9555983	0.2796929	0.0138935	0.5481982	0.0272312	0.0016225	7.90E-07	0.014255	0.0002853	2.793843	0.0952336	0.4414674	0.1485552	15.80226	5.341291	35.12857	1.001274	0.0158896	0.0005341	0.0056874	0.0000172	0.0000811	1.60E-06	0.0015907	0.0000787	0.0000452	2.18E-06	0.0035707	0.0000206	0.0158896	0.0005341
22036-01E	MR2	Meru	60E	12/03/2013	matrix	12	0.0423366	0.0238998	0.0238999	0.0000622	1.10E-07	1.002487	1.68E-15	7.18E-15	0.0132382	0.0005454	1.412877	0.6879778	0.0239089	1.348437	0.0468615	0.001609	1.36E-06	0.0152355	0.0003848	4.274715	0.1371555	0.3769875	0.2128189	8.81614	4.981758	35.15143	1.001275	0.0168983	0.0005357	0.0039531	8.08E-06	0.0000602	1.51E-06	0.0027196	0.0000941	0.0000523	2.15E-06	0.0038015	0.0000194	0.0168983	0.0005357
22036-01F	MR2	Meru	60E	12/03/2013	matrix	15	0.0665741	0.021118	0.0211183	0.0000622	1.10E-07	1.002487	1.95E-15	1.14E-14	0.018333	0.0004912	3.620015	2.440255	0.0374579	4.782899	0.0734174	0.0021465	2.13E-06	0.0163152	0.0003732	5.868742	0.1196893	0.5928147	0.1880503	10.0849	3.200609	35.1964	1.001275	0.0269183	0.000536	0.0045867	0.0000153	0.0000748	1.68E-06	0.0111928	0.0001672	0.0000841	2.24E-06	0.0060105	0.0000214	0.0269183	0.000536
22036-01G	MR2	Meru	60E	12/03/2013	matrix	17	0.0379307	0.033038	0.0330381	0.0000622	1.10E-07	1.002487	1.22E-15	5.26E-15	0.0142281	0.0007562	6.811089	3.563162	0.0658979	6.983798	0.1291598	0.0029552	3.75E-06	0.0157705	0.000498	4.296877	0.1876366	0.3377544	0.2941906	7.841824	6.83646	35.22037	1.001275	0.0123902	0.0005348	0.0028835	6.97E-06	0.0000455	1.42E-06	0.0102745	0.0001879	0.000041	2.18E-06	0.00269	0.0000208	0.0123902	0.0005348
22036-01H	MR2	Meru	60E	12/03/2013	matrix	19	0.078336	0.0398183	0.0398186	0.0000622	1.10E-07	1.002487	1.01E-15	5.00E-15	0.0154518	0.0009082	8.113079	4.609226	0.086294	9.034084	0.1691363	0.0044211	4.91E-06	0.0164654	0.000606	4.935693	0.2285177	0.697552	0.3545743	14.08849	7.187809	35.24329	1.001276	0.0117659	0.0005364	0.0023838	0.0000113	0.0000393	1.42E-06	0.0109877	0.0001983	0.0000368	2.16E-06	0.0024183	0.000022	0.0117659	0.0005364
22036-01I	MR2	Meru	60E	12/03/2013	matrix	21	0.0627652	0.0504784	0.0504786	0.0000622	1.10E-07	1.002487	7.98E-16	4.01E-15	0.0166192	0.0011466	9.875657	6.034367	0.0860346	11.82736	0.1686279	0.0038553	4.90E-06	0.0164337	0.0006486	5.029767	0.2886123	0.558897	0.4494967	11.06565	8.919993	35.31458	1.001276	0.0094467	0.000536	0.0018782	5.53E-06	0.0000309	1.21E-06	0.0113335	0.0001576	0.0000312	2.15E-06	0.0020693	0.0000206	0.0094467	0.000536
22036-01J	MR2	Meru	60E	12/03/2013	matrix	25	0.0594049	0.0277156	0.0277158	0.0000622	1.10E-07	1.002487	1.50E-15	8.63E-15	0.0196237	0.0006414	10.88819	7.855735	0.0780255	15.39724	0.15293	0.0019571	4.45E-06	0.0162745	0.0004842	5.748532	0.1559807	0.5289744	0.2467997	9.151618	4.272902	35.33853	1.001277	0.0203275	0.0005399	0.0035361	0.0000143	0.0000575	1.69E-06	0.0277788	0.000251	0.0000694	2.25E-06	0.0044446	0.0000248	0.0203275	0.0005399
22036-01K	MR2	Meru	60E	12/03/2013	matrix	30	0.3191184	0.082621	0.0826229	0.0000622	1.10E-07	1.002487	5.12E-16	8.09E-15	0.0459734	0.0019246	5.43003	9.17815	0.1539139	17.98917	0.3016713	0.0049748	8.76E-06	0.0222546	0.0010617	15.80663	0.4646207	2.841815	0.7358219	17.8621	4.649231	35.36173	1.001277	0.0190496	0.0005447	0.0012052	6.52E-06	0.0000268	1.26E-06	0.0110612	0.000175	0.0000554	2.30E-06	0.003829	0.0000349	0.0190496	0.0005447
22036-01L	MR2	Meru	60E	12/03/2013	matrix	35	1.322386	0.2394319	0.2394434	0.0000622	1.10E-07	1.002487	2.18E-16	2.77E-14	0.3888394	0.0068823	0.5689412	8.133666	0.1952597	15.94199	0.382709	0.0342555	0.0000111	0.0973669	0.0032694	127.1627	1.684944	11.77939	2.133565	9.209729	1.65918	35.3848	1.001277	0.065176	0.000602	0.0005125	4.78E-06	0.0000499	1.60E-06	0.0041688	0.0000919	0.0001993	2.99E-06	0.0145136	0.0001013	0.065176	0.000602
22031-01A	MR89	Meru	60E	10/03/2013	matrix	3	0.9278452	0.0191436	0.0192748	0.000062	1.50E-07	1.003201	4.36E-15	1.19E-13	0.0635538	0.0005551	0.0969049	0.2267539	0.0083451	0.4444376	0.0163565	0.0167166	4.74E-07	0.0299986	0.0003454	27.25508	0.1540548	8.296298	0.1712155	30.43533	0.6013158	33.53253	1.001258	0.279532	0.0008393	0.0102561	0.0000482	0.0003077	3.20E-06	0.0023256	0.0000846	0.0006518	4.78E-06	0.061249	0.0002405	0.279532	0.0008393
22031-01B	MR89	Meru	60E	10/03/2013	matrix	5	0.4910631	0.0186249	0.0186628	0.000062	1.50E-07	1.003146	7.17E-15	1.26E-13	0.0440833	0.0003849	0.1476656	0.2396552	0.0064654	0.4697243	0.0126722	0.0227808	3.68E-07	0.0283995	0.0002628	17.53453	0.1381024	4.390293	0.1665366	25.03472	0.9499049	33.55445	1.001258	0.2960793	0.0020785	0.0168855	0.0000562	0.0004795	4.10E-06	0.0040467	0.000108	0.0007444	6.00E-06	0.072493	0.0004103	0.2960793	0.0020785
22031-01C	MR89	Meru	60E	10/03/2013	matrix	7	0.491583	0.0093683	0.0094435	0.000062	1.50E-07	1.003036	8.74E-15	1.36E-13	0.0374868	0.0002066	0.1583753	0.2186034	0.0046392	0.4284626	0.0090929	0.0189426	2.64E-07	0.0258268	0.0002311	15.57116	0.0636555	4.394942	0.0837673	28.22177	0.5220474	33.59808	1.001259	0.3204445	0.0011235	0.0205794	0.0000402	0.0005315	4.60E-06	0.0044987	0.0000948	0.0007715	3.97E-06	0.0737188	0.0002108	0.3204445	0.0011235
22031-01D	MR89	Meru	60E	10/03/2013	matrix	9	0.4881451	0.0098178	0.0098887	0.000062	1.50E-07	1.002981	6.22E-15	1.05E-13	0.0417958	0.0002476	0.1575261	0.2423882	0.0053705	0.4750808	0.0105261	0.0121805	3.06E-07	0.0243106	0.0002449	16.82513	0.0544092	4.364202	0.0877871	25.9352	0.4990203	33.62011	1.001259	0.246455	0.0006419	0.014648	0.0000262	0.0003561	3.50E-06	0.0035505	0.0000782	0.0006122	3.45E-06	0.0552298	0.0001213	0.246455	0.0006419
22031-01E	MR89	Meru	60E	10/03/2013	matrix	12	0.5128728	0.0129382	0.0129976	0.000062	1.50E-07	1.002926	5.59E-15	1.14E-13	0.0528459	0.0002873	0.2014775	0.3917755	0.0080139	0.7678801	0.0157072	0.012377	4.56E-07	0.0264663	0.0002787	20.33327	0.0806828	4.585309	0.1156892	22.54527	0.5482033	33.64214	1.001259	0.2677724	0.000957	0.0131692	0.0000203	0.0003485	3.60E-06	0.0051594	0.0001049	0.0006959	3.62E-06	0.0588848	0.0001312	0.2677724	0.000957
22031-01F	MR89	Meru	60E	10/03/2013	matrix	15	0.5107964	0.014461	0.0145137	0.000062	1.50E-07	1.002752	3.73E-15	7.54E-14	0.0528307	0.0003647	0.8451978	1.641963	0.021248	3.218247	0.041646	0.0154428	1.21E-06	0.0274698	0.0003068	20.20454	0.0880789	4.566742	0.1293057	22.57695	0.6153395	33.71164	1.00126	0.1774608	0.0006124	0.0087832	0.0000223	0.0002413	2.61E-06	0.0144217	0.0001824	0.000464	2.97E-06	0.0390596	0.0000397	0.1774608	0.0006124
22031-01G	MR89	Meru	60E	10/03/2013	matrix	17	0.5209903	0.0194315	0.0194724	0.000062	1.50E-07	1.002697	2.37E-15	4.90E-14	0.0543222	0.0004531	1.185056	2.367054	0.0336287	4.639427	0.0659122	0.0151915	1.92E-06	0.0276364	0.000436	20.67968	0.110986	4.657893	0.1737517	22.48686	0.8248708	33.73364	1.00126	0.1154525	0.0005787	0.0055829	9.31E-06	0.0001543	2.41E-06	0.013215	0.0001859	0.0003033	2.48E-06	0.0254854	0.0000397	0.1154525	0.0005787
22031-01H	MR89	Meru	60E	10/03/2013	matrix	19	0.5011504	0.0222623	0.0222953	0.000062	1.50E-07	1.002643	2.12E-15	4.43E-14	0.0559356	0.0005396	1.429501	2.940039	0.0378577	5.762476	0.0742012	0.0171828	2.16E-06	0.0286055	0.000454	20.93599	0.1368642	4.48049	0.1990617	21.35688	0.934625	33.75567	1.00126	0.104384	0.0005911	0.0049859	0.0000154	0.0001426	2.21E-06	0.0146586	0.0001826	0.0002789	2.55E-06	0.0229181	0.0000402	0.104384	0.0005911
22031-01I	MR89	Meru	60E	10/03/2013	matrix	21	0.5073943	0.045344	0.0453606	0.000062	1.50E-07	1.002588	9.45E-16	1.97E-14	0.0558618	0.0010241	2.370608	4.868952	0.0791836	9.543147	0.1551999	0.0191658	4.51E-06	0.0291969	0.0006433	20.80677	0.2730798	4.536321	0.4054517	21.72739	1.950153	33.77766	1.00126	0.0463201	0.0005844	0.0022262	6.77E-06	0.000065	1.41E-06	0.0108393	0.0001726	0.0001244	2.25E-06	0.01	0.0000408	0.0463201	0.0005844
22031-01J	MR89	Meru	60E	10/03/2013	matrix	25	0.7046343	0.0582923	0.0583172	0.000062	1.50E-07	1.002478	7.38E-16	1.76E-14	0.0603754	0.0013499	2.46307	5.467564	0.0922872	10.71643	0.180883	0.0118133	5.26E-06	0.0274926	0.0007766	23.86091	0.3692962	6.300076	0.5212879	26.30146	2.19277	33.82171	1.001261	0.0414591	0.0005841	0.0017375	0.0000105	0.0000478	1.31E-06	0.0095001	0.0001493	0.0001049	2.26E-06	0.0094357	0.0000391	0.0414591	0.0005841
22031-01K	MR89	Meru	60E	10/03/2013	matrix	30	0.7134286	0.0772268	0.0772461	0.000062	1.50E-07	1.002423	5.88E-16	2.57E-14	0.1267513	0.0018374	1.415661	6.597273	0.09516	12.93066	0.1865136	0.0164513	5.43E-06	0.0416243	0.000897	43.66289	0.4694256	6.37872	0.6906168	14.54073	1.563322	33.84379	1.001261	0.0604648	0.0005916	0.0013848	5.76E-06	0.0000576	1.21E-06	0.009136	0.0001257	0.0001755	2.44E-06	0.0133265	0.0000391	0.0604648	0.0005916
22031-01L	MR89	Meru	60E	10/03/2013	matrix	35	1.067436	0.2007834	0.2008001	0.000062	1.50E-07	1.002369	2.67E-16	4.79E-14	0.571787	0.0063462	0.4557731	9.581401	0.1874554	18.77955	0.3674125	0.0184794	0.0000107	0.1265366	0.0028854	179.4436	1.636636	9.544813	1.795899	5.282901	0.9619446	33.86577	1.001261	0.1127523	0.0006049	0.0006283	4.56E-06	0.0000795	1.71E-06	0.0060204	0.000109	0.0003593	3.00E-06	0.0248513	0.0000371	0.1127523	0.0006049
22032-01A	MR92	Meru	60E	10/03/2013	matrix	3	2.761406	0.1917798	0.1918889	0.0000621	1.46E-07	1.002202	2.73E-16	4.08E-14	0.4179541	0.0058105	0.0592514	0.9107871	0.0715287	1.785143	0.1401962	0.0422828	4.07E-06	0.1059455	0.0025291	149.3672	1.593677	24.6511	1.713331	16.49309	1.115623	33.93285	1.001262	0.0959997	0.0006005	0.0006427	5.47E-06	0.0000681	1.51E-06	0.0005854	0.0000456	0.0002686	2.94E-06	0.0202881	0.0000844	0.0959997	0.0006005
22032-01B	MR92	Meru	60E	10/03/2013	matrix	5	1.436278	0.0970885	0.0971468	0.0000621	1.46E-07	1.002149	6.06E-16	4.86E-14	0.2260879	0.0024401	0.0600746	0.4996754	0.036777	0.9793638	0.0720828	0.0641503	2.09E-06	0.0771441	0.0015406	80.28466	0.7032299	12.81696	0.8667364	15.95886	1.051475	33.95423	1.001262	0.1145556	0.000782	0.0014269	7.61E-06	0.0001101	2.11E-06	0.000713	0.0000522	0.0003226	3.02E-06	0.0245089	0.0000997	0.1145556	0.000782
22032-01C	MR92	Meru	60E	10/03/2013	matrix	7	0.4887366	0.0321134	0.0321338	0.0000621	1.46E-07	1.002094	1.67E-15	4.95E-14	0.0844708	0.0008107	0.1001095	0.3112265	0.0141845	0.610004	0.0278017	0.0372418	8.07E-07	0.0410366	0.0006615	29.55851	0.209903	4.360209	0.2865345	14.7482	0.9350017	33.97634	1.001263	0.1165498	0.000658	0.003943	0.0000164	0.0001618	2.51E-06	0.0012272	0.0000556	0.0003331	2.88E-06	0.0266532	0.0000797	0.1165498	0.000658
22032-01D	MR92	Meru	60E	10/03/2013	matrix	9	0.4420746	0.0141363	0.0141743	0.0000621	1.46E-07	1.002487	3.86E-15	7.64E-14	0.053136	0.0003419	0.1028204	0.2011947	0.0068832	0.3943417	0.013491	0.0184709	3.91E-07	0.0286304	0.0003126	19.79464	0.0750777	3.943868	0.1261295	19.92178	0.6210067	34.04547	1.001263	0.1799266	0.0006308	0.0090897	0.0000115	0.0002602	2.81E-06	0.0018288	0.0000624	0.000483	3.04E-06	0.0401363	0.0000391	0.1799266	0.0006308
22032-01E	MR92	Meru	60E	11/03/2013	matrix	12	0.4453731	0.0127231	0.0127659	0.0000621	1.46E-07	1.002487	4.97E-15	1.37E-13	0.0792152	0.0003448	0.1208338	0.352239	0.0108743	0.6903884	0.0213136	0.0191263	6.18E-07	0.0337922	0.0002861	27.59888	0.0841214	3.973299	0.1135205	14.39336	0.3767013	34.06768	1.001263	0.3229391	0.0006367	0.0117012	0.0000263	0.0003954	3.20E-06	0.0041216	0.0001266	0.0009269	3.44E-06	0.0717654	0.0000492	0.3229391	0.0006367
22032-01F	MR92	Meru	60E	11/03/2013	matrix	15	0.4894382	0.0277066	0.0277304	0.0000621	1.46E-07	1.002487	2.79E-15	1.56E-13	0.172736	0.0007242	0.3124813	1.984772	0.0246863	3.890153	0.0483852	0.0254244	1.41E-06	0.0536199	0.0005277	55.78052	0.1438906	4.366469	0.247215	7.816999	0.4073035	34.08988	1.001264	0.3670875	0.0007091	0.0065809	0.0000106	0.0003529	3.40E-06	0.0130616	0.0001606	0.0011368	4.39E-06	0.0829039	0.0000873	0.3670875	0.0007091
22032-01G	MR92	Meru	60E	11/03/2013	matrix	17	0.4510908	0.0478435	0.0478552	0.0000621	1.46E-07	1.002487	1.11E-15	6.75E-14	0.1902431	0.0012287	0.4503924	3.150479	0.0479127	6.174939	0.0939089	0.0217116	2.73E-06	0.0556098	0.0008967	60.56862	0.2966267	4.024315	0.4268796	6.629419	0.6813581	34.11192	1.001264	0.1589378	0.0006347	0.0026241	7.14E-06	0.0001459	2.31E-06	0.0082672	0.0001233	0.0004992	2.92E-06	0.0357843	0.0000355	0.1589378	0.0006347
22032-01H	MR92	Meru	60E	11/03/2013	matrix	19	0.535352	0.0657452	0.0657572	0.0000621	1.46E-07	1.002487	8.37E-16	6.94E-14	0.2634875	0.0021424	0.6562381	6.357336	0.0926121	12.46038	0.1815196	0.0134165	5.27E-06	0.066499	0.0012013	82.91894	0.5306446	4.776145	0.5866331	5.734031	0.6814523	34.15657	1.001264	0.1633275	0.0005693	0.0019697	0.0000104	0.000131	2.25E-06	0.0125222	0.0001694	0.000519	3.19E-06	0.0367585	0.000027	0.1633275	0.0005693
22032-01I	MR92	Meru	60E	11/03/2013	matrix	21	0.6384714	0.0859277	0.0859408	0.0000621	1.46E-07	1.002487	6.04E-16	6.06E-14	0.3195016	0.0024382	0.7374209	8.662358	0.126516	16.97822	0.2479713	0.02402	7.20E-06	0.0806764	0.0012445	100.3647	0.5662658	5.696288	0.7667622	5.640672	0.7384678	34.17893	1.001265	0.1427303	0.0005649	0.0014221	5.58E-06	0.0001147	1.70E-06	0.0123189	0.0001727	0.0004544	2.96E-06	0.032114	0.0000258	0.1427303	0.0005649
22032-01J	MR92	Meru	60E	11/03/2013	matrix	25	0.620561	0.1140877	0.114097	0.0000621	1.46E-07	1.002487	5.63E-16	1.02E-13	0.5918024	0.0036741	0.7773568	16.91362	0.1752381	33.1507	0.3434666	0.0284959	1.00E-05	0.1334856	0.0021333	180.815	0.8863034	5.536468	1.018033	3.025143	0.5261886	34.20109	1.001265	0.2398886	0.0006265	0.0013267	5.41E-06	0.0001771	2.72E-06	0.0224394	0.0002129	0.0007851	3.65E-06	0.0541472	0.0000561	0.2398886	0.0006265
22032-01K	MR92	Meru	60E	11/03/2013	matrix	30	0.800965	0.1991218	0.1991306	0.0000621	1.46E-07	1.002487	2.46E-16	4.22E-14	0.5581777	0.0062499	1.080535	22.17424	0.3358474	43.46152	0.6582609	0.0333649	0.0000191	0.128579	0.0030952	171.9108	1.591544	7.146338	1.776991	4.091483	1.001342	34.27105	1.001266	0.099418	0.0005595	0.0005783	4.19E-06	0.0000744	1.70E-06	0.0128236	0.0001698	0.0003228	2.74E-06	0.0227947	0.0000261	0.099418	0.0005595
22032-01L	MR92	Meru	60E	11/03/2013	matrix	35	1.722465	0.2934809	0.2935087	0.0000621	1.46E-07	1.002487	1.66E-16	3.55E-14	0.6715206	0.0095374	1.154395	28.50033	0.5290374	55.86064	1.036913	0.0400509	0.0000301	0.1521061	0.0045929	213.2692	2.515331	15.37204	2.620403	7.061776	1.189914	34.29257	1.001266	0.0835555	0.0005582	0.0003918	3.76E-06	0.0000596	1.70E-06	0.011166	0.0001765	0.0002631	2.74E-06	0.0189135	0.0000272	0.0835555	0.0005582
22043-03A	MR154	Meru	60F	15/03/2013	wr	3	1.045235	0.0943352	0.0943818	0.0000622	1.77E-07	1.002906	5.71E-16	5.84E-14	0.3110894	0.0025451	0.0151846	0.174	0.0511876	0.34104	0.1003277	0.021437	2.91E-06	0.0785364	0.0016681	102.201	0.5598263	9.321137	0.8415004	9.119336	0.7648087	37.34059	1.001296	0.1374758	0.0005261	0.0013452	5.05E-06	0.0001056	2.19E-06	0.0002341	0.0000686	0.0004185	3.03E-06	0.0306901	0.0000703	0.1374758	0.0005261
22043-03B	MR154	Meru	60F	15/03/2013	wr	5	0.4267187	0.0193928	0.0194306	0.0000622	1.77E-07	1.002974	2.55E-15	5.92E-14	0.0650328	0.0004654	0.0463803	0.1112231	0.0115092	0.2179973	0.0225579	0.0239018	6.54E-07	0.0327612	0.0004371	23.21554	0.101396	3.804715	0.1729305	16.38786	0.6965296	37.4702	1.001298	0.1393946	0.0005311	0.0060044	0.0000113	0.0001967	2.58E-06	0.0006678	0.0000689	0.0003905	2.69E-06	0.030977	0.0000677	0.1393946	0.0005311
22043-03C	MR154	Meru	60F	15/03/2013	wr	7	0.2978452	0.0075567	0.0076039	0.0000622	1.77E-07	1.002987	6.50E-15	6.56E-14	0.0248913	0.0001879	0.0718888	0.0661189	0.0046943	0.1295931	0.0092009	0.0209614	2.67E-07	0.0241423	0.0002709	10.08357	0.0379889	2.655556	0.0673802	26.33607	0.625331	37.49476	1.001298	0.1543934	0.0004744	0.0153114	0.0000302	0.0003697	4.05E-06	0.0010124	0.0000716	0.0003811	2.77E-06	0.0358927	0.0000774	0.1543934	0.0004744
22043-03D	MR154	Meru	60F	15/03/2013	wr	9	0.3036974	0.0046474	0.0047267	0.0000622	1.77E-07	1.003000	1.15E-14	8.82E-14	0.0166255	0.0001028	0.082488	0.0507512	0.0034323	0.0994724	0.0067273	0.0177614	1.95E-07	0.0214731	0.0001692	7.668782	0.0266752	2.707738	0.0414394	35.31054	0.5014076	37.51906	1.001298	0.2077215	0.0006183	0.0270866	0.0000421	0.0005816	4.44E-06	0.0013747	0.0000927	0.0004503	2.69E-06	0.0468407	0.000061	0.2077215	0.0006183
22043-03E	MR154	Meru	60F	15/03/2013	wr	12	0.2944966	0.005208	0.0052747	0.0000622	1.77E-07	1.003026	1.16E-14	1.15E-13	0.0246318	0.0001267	0.0925715	0.084163	0.003417	0.1649594	0.0066974	0.0139935	1.94E-07	0.0216897	0.0001754	9.974732	0.0242911	2.625699	0.0464376	26.32378	0.4023763	37.56803	1.001299	0.2718845	0.0004623	0.0272573	0.0000421	0.0005912	4.64E-06	0.0022941	0.0000928	0.0006714	3.29E-06	0.0616724	0.0000496	0.2718845	0.0004623
22043-03F	MR154	Meru	60F	16/03/2013	wr	15	0.3116775	0.0081493	0.0081972	0.0000622	1.77E-07	1.003039	7.06E-15	1.07E-13	0.0414839	0.0001913	0.3102407	0.4734933	0.0080611	0.9280468	0.0157998	0.0106492	4.60E-07	0.0237141	0.0002111	15.12773	0.0322343	2.778895	0.0726649	18.36421	0.411309	37.59271	1.001299	0.2514098	0.0004416	0.0166191	0.0000152	0.0003941	3.46E-06	0.007869	0.0001333	0.0006894	3.11E-06	0.0566826	0.0000355	0.2514098	0.0004416
22043-03G	MR154	Meru	60F	16/03/2013	wr	17	0.3605805	0.0133411	0.0133803	0.0000622	1.77E-07	1.003052	3.59E-15	7.03E-14	0.0551391	0.0004628	0.6862131	1.391404	0.0245617	2.727152	0.0481409	0.0099676	1.40E-06	0.0260294	0.0003457	19.56457	0.129492	3.214954	0.1189617	16.41686	0.5456296	37.61725	1.001299	0.1655052	0.0004034	0.0084594	0.0000511	0.0002202	2.58E-06	0.0117705	0.0001943	0.0004664	2.69E-06	0.037359	0.000028	0.1655052	0.0004034
22043-03H	MR154	Meru	60F	16/03/2013	wr	21	0.3318699	0.0175264	0.0175517	0.0000622	1.77E-07	1.003093	2.80E-15	7.10E-14	0.0759861	0.0004709	1.127278	3.1495	0.0341756	6.173021	0.0669841	0.0077505	1.96E-06	0.029144	0.000388	25.38743	0.0985813	2.958945	0.1562792	11.62938	0.560242	37.69337	1.0013	0.1671824	0.0004311	0.0065852	0.0000182	0.0001919	2.48E-06	0.0207402	0.0002167	0.0005004	2.77E-06	0.0379521	0.0000262	0.1671824	0.0004311
22043-03I	MR154	Meru	60F	16/03/2013	wr	25	0.328983	0.0286533	0.0286685	0.0000622	1.77E-07	1.003105	1.30E-15	3.18E-14	0.0733441	0.0007741	1.328878	3.583617	0.0636611	7.023889	0.1247757	0.0057895	3.63E-06	0.0279495	0.0006403	24.53667	0.1695248	2.933204	0.2554954	11.92425	1.009197	37.7179	1.0013	0.0748557	0.0003911	0.0030508	0.0000133	0.0000853	1.90E-06	0.0109328	0.0001876	0.0002238	2.15E-06	0.0169045	0.0000283	0.0748557	0.0003911
22043-03J	MR154	Meru	60F	16/03/2013	wr	30	0.4311641	0.0466944	0.0467104	0.0000622	1.77E-07	1.003118	7.13E-16	1.73E-14	0.0695469	0.0011507	1.253149	3.204469	0.0828784	6.28076	0.1624417	0.0110401	4.72E-06	0.0290559	0.0008702	24.34344	0.2517604	3.844356	0.4163872	15.75664	1.695959	37.74238	1.0013	0.0408466	0.0003924	0.0016779	5.73E-06	0.0000488	1.44E-06	0.0053769	0.0001374	0.0001167	1.89E-06	0.0092276	0.0000248	0.0408466	0.0003924
22043-03K	MR154	Meru	60F	16/03/2013	wr	35	0.2828465	0.0521695	0.0521756	0.0000622	1.77E-07	1.003131	6.37E-16	1.57E-14	0.0750858	0.0013505	1.250579	3.452563	0.0746797	6.767023	0.1463723	0.0032062	4.25E-06	0.0273941	0.0008667	24.6573	0.3099085	2.521819	0.465172	10.20266	1.867863	37.76689	1.0013	0.0369646	0.0003918	0.0014991	9.67E-06	0.0000411	1.26E-06	0.0051759	0.0001064	0.0001126	1.89E-06	0.0083568	0.0000236	0.0369646	0.0003918
22044-01A	MR168	Meru	60F	16/03/2013	matrix	3	0.0530731	0.0129702	0.0129713	0.0000624	1.94E-07	1.003157	4.51E-15	8.56E-14	0.0619896	0.000358	0.054837	0.1253071	0.0079339	0.245602	0.0155504	0.0126816	4.51E-07	0.0283149	0.0003364	18.97288	0.068821	0.4716598	0.1152678	2.48584	0.552069	37.81616	1.001301	0.201609	0.0004705	0.0106262	0.0000282	0.0003009	3.46E-06	0.0013315	0.000084	0.0006587	3.37E-06	0.046058	0.0000487	0.201609	0.0004705
22044-01B	MR168	Meru	60F	16/03/2013	matrix	5	0.0129396	0.0031919	0.0031921	0.0000624	1.94E-07	1.00317	1.23E-14	3.46E-14	0.0090362	0.00008	0.2952592	0.0984213	0.0041632	0.1929058	0.0081598	0.0150327	2.37E-07	0.0190921	0.0001673	2.806026	0.0148862	0.1149926	0.028366	4.098797	0.9805213	37.84101	1.001301	0.0813656	0.0004064	0.0289967	0.0000421	0.0005536	4.74E-06	0.0028539	0.0001203	0.000262	2.29E-06	0.0181892	0.0000194	0.0813656	0.0004064
22044-01C	MR168	Meru	60F	16/03/2013	matrix	7	0.0086596	0.0042238	0.0042239	0.0000624	1.94E-07	1.003183	8.44E-15	2.08E-14	0.0080289	0.0001046	0.3464107	0.1025861	0.0047205	0.2010687	0.0092522	0.0180705	2.68E-07	0.0199485	0.0001915	2.466866	0.0202953	0.0769569	0.0375368	3.120279	1.502099	37.86573	1.001301	0.0490429	0.0003938	0.0198806	0.0000212	0.0003966	3.75E-06	0.0020395	0.0000935	0.0001596	2.07E-06	0.0111391	0.0000233	0.0490429	0.0003938
22044-01D	MR168	Meru	60F	16/03/2013	matrix	9	0.010708	0.0056363	0.0056364	0.0000624	1.94E-07	1.003224	6.01E-15	1.63E-14	0.0087706	0.0001381	0.4211847	0.136143	0.0066454	0.2668402	0.0130249	0.0114254	3.78E-07	0.0177963	0.0002207	2.70382	0.028684	0.0951611	0.0500893	3.520075	1.838038	37.94358	1.001302	0.0382835	0.0003935	0.014159	0.0000272	0.000252	3.06E-06	0.0019277	0.0000937	0.0001242	1.94E-06	0.0088456	0.0000212	0.0382835	0.0003935
22044-01E	MR168	Meru	60F	16/03/2013	matrix	12	0.008023	0.0075239	0.007524	0.0000624	1.94E-07	1.003237	4.74E-15	2.01E-14	0.014051	0.0001883	0.4991025	0.2581582	0.0090449	0.50599	0.0177279	0.004909	5.14E-07	0.0165449	0.0002443	4.246804	0.0373726	0.071299	0.0668644	1.678855	1.556567	37.96834	1.001302	0.0473533	0.0003963	0.0111503	0.0000252	0.0001845	2.67E-06	0.0028785	0.0001003	0.0001567	2.07E-06	0.0107471	0.0000205	0.0473533	0.0003963
22044-01F	MR168	Meru	60F	16/03/2013	matrix	15	0.011049	0.012674	0.012674	0.0000624	1.94E-07	1.00325	2.73E-15	1.79E-14	0.0218142	0.0003178	1.031682	0.8277341	0.0200805	1.622359	0.0393578	0.0042169	1.14E-06	0.0177543	0.0003171	6.545577	0.0643527	0.0981908	0.1126323	1.499388	1.703867	37.9932	1.001303	0.0420631	0.0003898	0.0064262	0.0000182	0.0001141	2.00E-06	0.0053192	0.0001277	0.0001402	2.00E-06	0.0097619	0.0000198	0.0420631	0.0003898
22044-01G	MR168	Meru	60F	16/03/2013	matrix	17	0.0512014	0.0201901	0.0201907	0.0000624	1.94E-07	1.003263	1.60E-15	1.24E-14	0.0247237	0.0004874	1.221749	1.110852	0.031426	2.177269	0.0615949	0.0037025	1.79E-06	0.0181167	0.000461	7.747907	0.1057914	0.4550264	0.1794317	5.868788	2.304637	38.01798	1.001303	0.0291144	0.0003872	0.0037577	7.94E-06	0.0000681	1.71E-06	0.0041743	0.0001174	0.0000929	1.82E-06	0.0069227	0.0000205	0.0291144	0.0003872
22044-01H	MR168	Meru	60F	16/03/2013	matrix	21	0.0430875	0.0156769	0.0156775	0.0000624	1.94E-07	1.003289	2.17E-15	1.83E-14	0.0275412	0.0003888	1.63633	1.657191	0.0305041	3.248094	0.0597881	0.0017706	1.74E-06	0.0179623	0.0003612	8.472682	0.0825356	0.3829167	0.1393218	4.514475	1.627979	38.06769	1.001303	0.0431951	0.0003941	0.0050982	0.0000152	0.0000916	1.81E-06	0.0084486	0.0001529	0.0001404	1.94E-06	0.0095219	0.0000292	0.0431951	0.0003941
22044-01I	MR168	Meru	60F	16/03/2013	matrix	25	0.1660687	0.0193498	0.0193567	0.0000624	1.94E-07	1.003302	1.74E-15	1.68E-14	0.0280279	0.0004787	2.184375	2.251197	0.0397251	4.412346	0.0778612	0.0008848	2.26E-06	0.017725	0.0003567	9.660838	0.0996401	1.475897	0.1719748	15.25376	1.771746	38.09236	1.001304	0.0395936	0.0003874	0.0040984	0.0000113	0.0000726	1.44E-06	0.0092262	0.0001602	0.0001149	1.94E-06	0.0088714	0.0000298	0.0395936	0.0003874
22044-01J	MR168	Meru	60F	16/03/2013	matrix	30	0.1727943	0.0284268	0.0284318	0.0000624	1.94E-07	1.003315	1.11E-15	9.65E-15	0.0245813	0.0006836	2.152536	1.945632	0.0487325	3.813438	0.0955158	0.0044866	2.77E-06	0.0183262	0.0005269	8.716473	0.1553813	1.535672	0.2526488	17.59508	2.902655	38.11706	1.001304	0.0227168	0.0003872	0.0026062	0.0000113	0.0000478	1.35E-06	0.0050707	0.0001246	0.0000641	1.76E-06	0.0049172	0.0000255	0.0227168	0.0003872
22044-01K	MR168	Meru	60F	16/03/2013	matrix	35	0.0655665	0.050731	0.0507314	0.0000624	1.94E-07	1.003354	6.02E-16	5.14E-15	0.0271457	0.0012001	1.726532	1.723413	0.0764617	3.37789	0.1498649	0.0011203	4.35E-06	0.0176604	0.0007762	8.548687	0.2752804	0.5826905	0.4508553	6.808347	5.268231	38.19348	1.001304	0.0121123	0.0003824	0.0014169	5.01E-06	0.000025	1.09E-06	0.0024418	0.0001076	0.0000385	1.69E-06	0.0030933	0.0000189	0.0121123	0.0003824
22048-02A	MR260	Meru	60F	20/03/2013	matrix	3	0.057572	0.0129659	0.0129671	0.0000618	1.84E-07	1.003838	3.35E-15	3.33E-14	0.0316082	0.0003481	0.0669985	0.0781887	0.0079597	0.1532499	0.015601	0.0106361	4.52E-07	0.0218542	0.0002722	9.948886	0.0537727	0.5160108	0.1162139	5.186697	1.149619	40.79812	1.001328	0.0784647	0.0003922	0.0078868	0.0000138	0.0001724	2.11E-06	0.0006167	0.0000625	0.0002493	2.71E-06	0.0172181	0.0000205	0.0784647	0.0003922
22048-02B	MR260	Meru	60F	20/03/2013	matrix	5	0.0178392	0.0052522	0.0052524	0.0000618	1.84E-07	1.003856	7.95E-15	2.10E-14	0.0083117	0.0001363	0.1700689	0.0523011	0.0040762	0.1025101	0.0079893	0.012608	2.32E-07	0.0181205	0.0001653	2.638314	0.0239469	0.1598883	0.0470742	6.06163	1.7738	40.82696	1.001328	0.0493607	0.0004319	0.0187092	0.0000328	0.000339	3.00E-06	0.0009785	0.0000759	0.0001555	2.54E-06	0.010924	0.0000227	0.0493607	0.0004319
22048-02C	MR260	Meru	60F	20/03/2013	matrix	7	0.0202849	0.0086724	0.0086726	0.0000618	1.84E-07	1.003873	4.45E-15	1.26E-14	0.0088619	0.0002281	0.1897705	0.0621605	0.0066115	0.1218345	0.0129585	0.0230122	3.76E-07	0.0218121	0.0002527	2.82374	0.0374363	0.1818089	0.0777295	6.439897	2.747322	40.8544	1.001329	0.0295893	0.0003837	0.0104787	0.0000147	0.0002286	2.61E-06	0.0006514	0.000069	0.0000929	2.39E-06	0.0065666	0.0000212	0.0295893	0.0003837
22048-02D	MR260	Meru	60F	20/03/2013	matrix	9	0.0484634	0.0110175	0.0110185	0.0000618	1.84E-07	1.003926	3.58E-15	1.69E-14	0.014361	0.0002933	0.19793	0.1048346	0.008207	0.2054758	0.0160857	0.0257885	4.67E-07	0.0238097	0.0003175	4.714884	0.0476141	0.4343705	0.0987498	9.213435	2.088214	40.9388	1.001329	0.0397492	0.000382	0.0084306	0.0000211	0.0002007	2.61E-06	0.0008838	0.0000689	0.0001211	2.45E-06	0.0088032	0.000022	0.0397492	0.000382
22048-02E	MR260	Meru	60F	20/03/2013	matrix	12	0.0519467	0.0091552	0.0091565	0.0000618	1.84E-07	1.003945	4.37E-15	2.09E-14	0.0145175	0.0002452	0.4909461	0.2623647	0.0099407	0.5142349	0.0194838	0.0221429	5.65E-07	0.0225759	0.0002611	4.779979	0.0391321	0.4655907	0.0820579	9.740044	1.708655	40.96785	1.00133	0.049158	0.0003786	0.0102841	0.000024	0.0002322	2.61E-06	0.0026982	0.0001016	0.0001493	2.50E-06	0.0109929	0.000022	0.049158	0.0003786
22048-02F	MR260	Meru	60F	20/03/2013	matrix	15	0.0424544	0.0065087	0.00651	0.0000618	1.84E-07	1.003962	6.54E-15	3.44E-14	0.0165113	0.0001736	1.221861	0.7420401	0.0125653	1.454399	0.024628	0.0205708	7.15E-07	0.0223921	0.0002179	5.251195	0.026317	0.3805115	0.0583375	7.243332	1.096222	40.99565	1.00133	0.080901	0.0003868	0.0154062	0.0000174	0.000345	3.30E-06	0.011432	0.0001924	0.0002544	2.66E-06	0.0179481	0.000027	0.080901	0.0003868
22048-02G	MR260	Meru	60F	20/03/2013	matrix	17	0.0506512	0.0104861	0.0104872	0.0000618	1.84E-07	1.003979	3.75E-15	1.81E-14	0.0149311	0.000278	1.706612	0.9371539	0.0170462	1.836822	0.0334106	0.0200455	9.70E-07	0.0219036	0.0003025	4.836855	0.0459458	0.4539792	0.093987	9.380939	1.935988	41.02327	1.00133	0.0426837	0.0003854	0.0088247	0.0000211	0.0001933	2.61E-06	0.0082701	0.0001485	0.0001318	2.43E-06	0.0095817	0.0000233	0.0426837	0.0003854
22048-02H	MR260	Meru	60F	20/03/2013	matrix	21	0.0437213	0.0098062	0.0098071	0.0000618	1.84E-07	1.004013	4.29E-15	2.74E-14	0.020442	0.0002653	1.895895	1.425178	0.0190121	2.79335	0.0372637	0.0193136	1.08E-06	0.0226758	0.0002454	6.380616	0.041105	0.3918671	0.0878928	6.135975	1.365764	41.07736	1.001331	0.0644626	0.0003829	0.0101029	0.000022	0.0002291	2.41E-06	0.0143984	0.0001886	0.0002065	2.64E-06	0.0142043	0.0000262	0.0644626	0.0003829
22048-02I	MR260	Meru	60F	20/03/2013	matrix	25	0.131192	0.015809	0.0158138	0.0000618	1.84E-07	1.004031	2.65E-15	2.75E-14	0.0312282	0.0004326	1.370345	1.57362	0.0281846	3.084295	0.0552418	0.0180913	1.60E-06	0.0242922	0.0003798	10.37254	0.0690547	1.175881	0.1417022	11.32457	1.356186	41.10634	1.001331	0.0646969	0.0003785	0.0062373	0.0000183	0.0001515	2.31E-06	0.0098152	0.0001727	0.0001948	2.64E-06	0.0141599	0.000022	0.0646969	0.0003785
22048-02J	MR260	Meru	60F	20/03/2013	matrix	30	0.4059975	0.0347749	0.0347958	0.0000618	1.84E-07	1.004049	1.37E-15	3.59E-14	0.0760217	0.0009428	0.4805938	1.34355	0.0357069	2.633359	0.0699855	0.0234651	2.03E-06	0.0346429	0.0006117	26.22821	0.1818732	3.639255	0.311748	13.86246	1.178719	41.1342	1.001331	0.0844262	0.0004824	0.0032189	0.000012	0.0001115	1.91E-06	0.0043248	0.0001133	0.0002447	2.89E-06	0.0183268	0.0000643	0.0844262	0.0004824
22048-02K	MR260	Meru	60F	20/03/2013	matrix	35	0.2155322	0.0386495	0.0386548	0.0000618	1.84E-07	1.004086	9.60E-16	1.15E-14	0.0342954	0.0010315	1.495659	1.886147	0.0528505	3.696848	0.103587	0.0163666	3.01E-06	0.024266	0.0005957	12.01775	0.1725555	1.931872	0.3464467	16.05454	2.882333	41.19309	1.001332	0.0271552	0.0003629	0.0022596	0.0000103	0.0000548	1.31E-06	0.0042619	0.0001173	0.0000775	2.30E-06	0.0060692	0.000024	0.0271552	0.0003629
KERIMASI
21765-01A	10-KER-04	Kerimasi	58b	21/12/2012	matrix	3	617.1916	1291.883	1291.883	0.0000621	1.29E-07	1.000000	-1.34E-17	4.62E-12	-1180.111	3722.87	0.009634	-417.9824	1318.99	-819.2455	2585.22	7.326443	0.0749714	-221.0752	697.4215	-343832.7	1.08E+06	6572.9	16245.48	-2.479774	1.030077	89.3687	1.001609	10.87924	0.1107373	-0.0000316	0.0000991	0.0069951	0.0000161	0.0132254	0.0010122	0.03734	0.0000234	10.8273	0.1102143	-0.0002061	0.0001433
21765-01B	10-KER-04	Kerimasi	58b	21/12/2012	matrix	5	-9.663948	2.395902	2.395988	0.0000621	1.29E-07	1.002416	2.49E-16	5.92E-13	8.251413	1.368006	0.0956385	29.0133	5.117262	56.86608	10.02983	0.084881	0.0002909	1.603932	0.2660865	2377.29	394.2686	-86.08451	21.28511	-3.546423	0.5240179	89.44055	1.001609	1.394175	0.0065799	0.0005865	0.0000965	0.0009406	5.83E-06	0.017015	0.0010222	0.0048391	0.0000101	1.47246	0.0148268	0.0005241	0.0001436
21765-01C	10-KER-04	Kerimasi	58b	21/12/2012	matrix	7	-1.776727	0.6724067	0.672417	0.0000621	1.29E-07	1.002411	3.29E-16	3.95E-13	4.083913	0.4851912	0.2640537	39.64637	4.896713	77.70688	9.597557	0.0207796	0.0002784	0.7916558	0.0942706	1200.864	142.6709	-15.86134	5.999809	-1.283597	0.287416	89.51551	1.00161	0.9300387	0.0018148	0.0007745	0.0000913	0.0006131	5.07E-06	0.0307051	0.0010361	0.0031629	6.51E-06	0.9236632	0.0091928	0.0009424	0.0001133
21765-01D	10-KER-04	Kerimasi	58b	22/12/2012	matrix	9	-2.331651	1.352758	1.352767	0.0000621	1.29E-07	1.000000	1.56E-15	1.75E-12	3.828096	0.1084228	0.185	26.037	0.8041092	51.03252	1.576054	0.0014133	0.0000458	0.7370531	0.0210107	1120.567	33.61406	-20.8121	12.0668	-1.822903	0.9932335	89.59083	1.00161	4.117497	0.0403246	0.0036745	0.0001033	0.0027083	8.75E-06	0.0956724	0.0011778	0.0140663	0.0000127	4.105707	0.0402039	0.0041249	0.0001842
21765-01E	10-KER-04	Kerimasi	58b	22/12/2012	matrix	12	1.08126	0.0502516	0.0503022	0.0000621	1.29E-07	1.000000	1.08E-12	2.34E-11	0.0435265	0.0007164	8.007465	12.81419	3.672299	25.11581	7.197706	0.0213146	0.0002087	0.0272777	0.0001006	21.52973	0.2227249	9.660361	0.4491001	44.46251	2.012396	89.73793	1.001611	55.00015	0.5378648	2.554614	0.0075126	0.0696839	0.00014	32.73531	9.358373	0.1111935	0.0018	46.55455	0.5879721	2.116018	0.0796393
21765-01F	10-KER-04	Kerimasi	58b	22/12/2012	matrix	12	1.049788	0.0418924	0.0419495	0.0000621	1.29E-07	1.000000	1.85E-13	5.46E-12	0.0673422	0.0007492	0.116657	0.2891533	0.0031114	0.5667404	0.0060983	0.0178555	1.79E-07	0.0311067	0.0001836	29.46347	0.3291144	9.379099	0.374387	31.82719	1.279864	90.76938	1.001615	12.85087	0.1303248	0.4361628	0.0019051	0.0135676	0.000052	0.1261179	0.0012346	0.0293722	0.0003	12.21317	0.1655564	0.3982158	0.0096847
21765-01G	10-KER-04	Kerimasi	58b	22/12/2012	matrix	13	1.097821	0.0499276	0.04998	0.0000621	1.29E-07	1.000000	2.82E-13	7.75E-12	0.0592279	0.0008408	0.0735038	0.160386	0.002105	0.3143566	0.0041258	0.0102199	1.20E-07	0.0269413	0.0003409	27.48098	0.405867	9.808365	0.4462085	35.68831	1.663817	90.84182	1.001615	18.25011	0.2453733	0.6640998	0.0038071	0.0178917	0.0002	0.1065123	0.0012518	0.0393332	0.00051	17.33698	0.2676716	0.6255008	0.0154526
21765-01H	10-KER-04	Kerimasi	58b	22/12/2012	matrix	14	1.078779	0.0548785	0.0549246	0.0000621	1.29E-07	1.000000	2.47E-13	6.91E-12	0.0613823	0.0009404	0.0731376	0.1653819	0.0022512	0.3241485	0.0044123	0.0109556	1.29E-07	0.027603	0.0004018	27.95373	0.4445461	9.638188	0.4904507	34.47589	1.795612	90.91482	1.001615	16.27533	0.2355361	0.5822239	0.0036069	0.0160711	0.00021	0.0962893	0.0011616	0.0357383	0.0005	15.69782	0.2525464	0.5601078	0.0139778
21765-01I	10-KER-04	Kerimasi	58b	22/12/2012	matrix	14	1.140527	0.0542561	0.0543082	0.0000621	1.29E-07	1.000000	1.09E-13	3.29E-12	0.066946	0.0009228	0.1021988	0.2518687	0.0044985	0.4936627	0.008817	0.0118528	2.57E-07	0.0289632	0.0003506	30.15924	0.4315049	10.19005	0.4849041	33.78221	1.642559	91.06312	1.001616	7.746077	0.1023698	0.2568393	0.001305	0.0074389	0.000081	0.0646898	0.0011041	0.0171944	0.00022	7.400206	0.1083628	0.2343231	0.0062218
21765-01J	10-KER-04	Kerimasi	58b	22/12/2012	matrix	14	1.136224	0.0519647	0.0520187	0.0000621	1.29E-07	1.000000	6.86E-14	2.10E-12	0.068819	0.0009456	0.1110877	0.2813959	0.0069414	0.551536	0.0136051	0.0129841	3.95E-07	0.0297071	0.0003684	30.67745	0.4108815	10.15158	0.4644245	33.08548	1.537075	91.13573	1.001616	4.952694	0.0598888	0.1614441	0.0008758	0.004796	0.000053	0.0454297	0.0010902	0.0111104	0.0001401	4.757066	0.0740052	0.1519393	0.0038906
21765-01K	10-KER-04	Kerimasi	58b	22/12/2012	matrix	15	0.878881	0.0458287	0.0458653	0.0000621	1.29E-07	1.002297	4.63E-14	1.35E-12	0.0716899	0.001108	0.1208056	0.3187341	0.0100685	0.6247188	0.0197342	0.0126657	5.73E-07	0.0301397	0.0004374	29.23217	0.3832483	7.851796	0.4095265	26.85468	1.383463	91.20871	1.001616	3.185682	0.0310163	0.1089787	0.0009356	0.0032846	0.000038	0.0347352	0.0010529	0.0078127	0.0001001	3.397883	0.0519965	0.0977311	0.0028929
21751-02B	10-LOO-01	Loolmurwak	58a	21/03/2013	mica	5	3.566413	0.5591094	0.5591611	0.0000614	1.31E-07	1.004376	9.83E-17	8.71E-14	2.859505	0.1022811	0.0042054	0.4424436	2.846914	0.8671895	5.579952	0.0594749	0.0001618	0.5745662	0.0221348	886.0519	31.40418	32.22043	5.056218	3.635265	0.5398697	521.6425	1.002242	0.2051034	0.0003953	0.0002315	8.08E-06	0.000133	2.01E-06	0.0001024	0.0006561	0.0006619	3.45E-06	0.0454701	0.0000233	0.2051034	0.0003953
21751-02C	10-LOO-01	Loolmurwak	58a	21/03/2013	mica	7	1.864923	0.2031437	0.2031827	0.0000614	1.31E-07	1.004429	2.58E-16	7.60E-14	0.930428	0.0146546	-0.0152933	-0.5228042	1.105631	-1.024696	2.167037	0.0081973	0.0000628	0.1913638	0.004348	294.7251	4.346123	16.84053	1.835366	5.716119	0.6040548	522.7133	1.002242	0.1789896	0.0003856	0.0006073	8.74E-06	0.0001162	2.01E-06	-0.0003175	0.0006685	0.0005651	3.37E-06	0.0399627	0.0000264	0.1789896	0.0003856
21751-02D	10-LOO-01	Loolmurwak	58a	21/03/2013	mica	9	1.514202	0.1132072	0.1132533	0.0000614	1.31E-07	1.004446	4.31E-16	6.62E-14	0.4684038	0.0054753	0.032669	0.5629155	0.6320557	1.103314	1.238829	0.0249239	0.0000359	0.109534	0.0021704	153.4917	1.529728	13.67214	1.022608	8.903889	0.6488239	523.0548	1.002243	0.1559067	0.0003733	0.0010157	9.68E-06	0.0001113	1.91E-06	0.0005718	0.0006391	0.0004758	3.13E-06	0.034732	0.0000241	0.1559067	0.0003733
21751-02E	10-LOO-01	Loolmurwak	58a	21/03/2013	mica	12	0.8021442	0.0561447	0.0561707	0.0000614	1.31E-07	1.004464	8.60E-16	7.73E-14	0.2765573	0.0023183	0.0089161	0.0909867	0.3357491	0.178334	0.6580682	0.0040577	0.0000191	0.0660031	0.0011305	89.817	0.6048879	7.241348	0.5069579	8.061879	0.5482451	523.4254	1.002243	0.1819388	0.0003901	0.0020257	0.0000127	0.0001337	2.11E-06	0.0001843	0.0006771	0.0005602	3.06E-06	0.0405734	0.000028	0.1819388	0.0003901
21751-02F	10-LOO-01	Loolmurwak	58a	21/03/2013	mica	15	0.9119701	0.040694	0.0407405	0.0000614	1.31E-07	1.004481	1.37E-15	9.58E-14	0.2057807	0.0014557	0.0245024	0.1857038	0.1920317	0.3639795	0.3763821	0.0061853	0.0000109	0.0533207	0.0007883	69.66578	0.3398931	8.233051	0.367469	11.81649	0.5108504	523.7773	1.002243	0.2254693	0.0003901	0.0032364	0.0000145	0.0001726	2.41E-06	0.000601	0.0006187	0.000666	3.61E-06	0.0506977	0.0000233	0.2254693	0.0003901
21751-02G	10-LOO-01	Loolmurwak	58a	21/03/2013	mica	17	0.8002115	0.0280736	0.0281254	0.0000614	1.31E-07	1.004516	1.73E-15	8.64E-14	0.1432907	0.0008253	-0.0072508	-0.0378653	0.182327	-0.074216	0.3573609	0.002213	0.0000104	0.0401182	0.0005556	50.01593	0.1554591	7.223897	0.2534898	14.44379	0.4920762	524.4765	1.002244	0.203511	0.000395	0.0040689	9.54E-06	0.0001632	2.21E-06	-0.0001541	0.0007385	0.000583	3.06E-06	0.0450364	0.0000255	0.203511	0.000395
21751-02H	10-LOO-01	Loolmurwak	58a	21/03/2013	mica	21	0.7495249	0.0190854	0.0191522	0.0000614	1.31E-07	1.004533	2.69E-15	9.86E-14	0.100216	0.0006013	-0.0140261	-0.0513461	0.1024818	-0.1006383	0.2008643	0.0045839	5.83E-06	0.0327737	0.0004133	36.69688	0.1357692	6.766229	0.1723263	18.43919	0.4522934	524.8321	1.002244	0.2322612	0.0004105	0.0063292	0.0000201	0.0002074	2.51E-06	-0.000325	0.0006457	0.0006343	3.21E-06	0.0515551	0.000024	0.2322612	0.0004105
21751-02I	10-LOO-01	Loolmurwak	58a	21/03/2013	mica	25	0.7540238	0.0181629	0.018234	0.0000614	1.31E-07	1.004551	2.58E-15	7.82E-14	0.0787538	0.0005419	0.0338454	0.0983266	0.1088074	0.1927201	0.2132626	0.0042955	6.18E-06	0.0286011	0.0004104	30.31578	0.1187707	6.806851	0.1639971	22.45212	0.5263994	525.1986	1.002244	0.1840427	0.0004054	0.0060709	0.0000191	0.0001736	2.41E-06	0.0005969	0.0006576	0.0004781	2.91E-06	0.0407629	0.0000227	0.1840427	0.0004054
21751-02J	10-LOO-01	Loolmurwak	58a	21/03/2013	mica	30	0.7548709	0.0264095	0.0264586	0.0000614	1.31E-07	1.004605	1.66E-15	5.56E-14	0.0894892	0.0007466	-0.014803	-0.0483704	0.1633886	-0.0948059	0.3202417	0.003455	9.29E-06	0.0303515	0.0005504	33.54177	0.1295166	6.8145	0.2384583	20.31759	0.7014951	526.3013	1.002245	0.1308643	0.0003751	0.0039015	9.63E-06	0.0001184	2.11E-06	-0.0001887	0.0006345	0.0003491	2.78E-06	0.0292438	0.0000294	0.1308643	0.0003751
21751-02K	10-LOO-01	Loolmurwak	58a	21/03/2013	mica	35	0.7538082	0.0403601	0.0403921	0.0000614	1.31E-07	1.004623	1.07E-15	3.82E-14	0.0964819	0.0011518	-0.0500844	-0.1773236	0.2755463	-0.3475542	0.5400708	0.0007994	0.0000157	0.0307662	0.0005355	35.63134	0.1915372	6.804905	0.3644213	19.10088	1.016283	526.6557	1.002245	0.0898453	0.0003625	0.0025215	8.57E-06	0.0000776	1.31E-06	-0.0004471	0.0006916	0.0002433	2.78E-06	0.0204085	0.000027	0.0898453	0.0003625
21752-01A	10-LOO-06	Loolmurwak	58a	04/01/2013	WR	3	-1.682752	0.4434511	0.4434664	0.0000612	1.34E-07	1.001478	5.38E-16	4.88E-13	3.088904	0.0204332	0.003431	0.3899688	0.3386081	0.7643389	0.6636718	0.0061883	0.0000192	0.5996648	0.0057477	907.1103	6.660283	-15.24063	4.014448	-1.679665	0.3693251	115.8942	1.001702	1.148459	0.0039054	0.0012661	8.15E-06	0.0007592	5.33E-06	0.0004937	0.0004281	0.0039107	5.35E-06	0.2570503	0.0000614	0.0000865	0.000029
21752-01B	10-LOO-06	Loolmurwak	58a	04/01/2013	WR	4	0.1422651	0.1223647	0.1223651	0.0000612	1.34E-07	1.001451	3.91E-16	9.21E-14	0.7854444	0.0065793	0.0344465	0.9950311	0.4738726	1.950261	0.9287902	0.0012716	0.0000269	0.1614397	0.0027631	235.7497	1.78142	1.289141	1.108857	0.5464411	0.4055784	115.9976	1.001703	0.2168531	0.0002724	0.0009198	6.80E-06	0.0001485	2.28E-06	0.0009153	0.0004352	0.0007225	2.80E-06	0.0482107	0.000017	0.0001045	0.000035
21752-01C	10-LOO-06	Loolmurwak	58a	04/01/2013	WR	5	0.0590717	0.0709866	0.0709867	0.0000612	1.34E-07	1.001424	4.54E-16	4.23E-14	0.3108851	0.0027979	0.0550015	0.6289769	0.4079348	1.232795	0.7995522	-0.0035234	0.0000232	0.0698722	0.0016706	93.31807	0.6497034	0.5352689	0.6432441	0.5733441	0.6474484	116.0988	1.001703	0.0997033	0.0002143	0.0010684	7.01E-06	0.0000747	1.71E-06	0.000672	0.0004352	0.0003322	2.03E-06	0.0221823	0.000017	0.0000937	0.0000304
21752-01D	10-LOO-06	Loolmurwak	58a	04/01/2013	WR	6	0.0346086	0.0474562	0.0474563	0.0000612	1.34E-07	1.001372	5.36E-16	2.94E-14	0.1829511	0.0016707	0.1046672	0.7043387	0.340101	1.380504	0.6665979	0.0048117	0.0000193	0.0484998	0.0012473	54.88798	0.3740071	0.3135982	0.4300179	0.5710634	0.7479093	116.2993	1.001704	0.0692279	0.0002114	0.0012613	7.61E-06	0.0000612	1.52E-06	0.0008884	0.0004283	0.0002307	1.58E-06	0.0154882	0.0000169	0.0003171	0.0000297
21752-01E	10-LOO-06	Loolmurwak	58a	04/01/2013	WR	7	0.0302497	0.0377719	0.0377719	0.0000612	1.34E-07	1.001345	6.09E-16	2.24E-14	0.1222393	0.0011533	0.1883086	0.8466081	0.2989857	1.659352	0.586012	0.00501	0.000017	0.0370575	0.0008962	36.70779	0.2417069	0.2741006	0.3422637	0.7462746	0.9030578	116.401	1.001704	0.0526653	0.0002219	0.0014347	7.16E-06	0.0000532	1.25E-06	0.0012146	0.0004283	0.0001754	1.40E-06	0.0117594	0.0000184	0.0002855	0.0000311
21752-01F	10-LOO-06	Loolmurwak	58a	04/01/2013	WR	9	0.0978393	0.0236196	0.0236206	0.0000612	1.34E-07	1.001318	1.02E-15	2.33E-14	0.073638	0.0007535	0.2253047	0.6102949	0.1784006	1.196178	0.3496652	0.0032914	0.0000101	0.0272646	0.0006935	22.82639	0.1628468	0.886564	0.2140331	3.882378	0.9102759	116.5026	1.001704	0.0548107	0.0002229	0.0024012	0.0000139	0.0000655	1.62E-06	0.0014654	0.0004277	0.0001768	1.49E-06	0.012199	0.0000178	0.0004659	0.0000297
21752-01G	10-LOO-06	Loolmurwak	58a	04/01/2013	WR	11	0.0775064	0.0155597	0.0155606	0.0000612	1.34E-07	1.001236	1.22E-15	9.79E-15	0.0246878	0.0004044	0.5190431	0.4714366	0.1492934	0.9240157	0.2926151	-0.0016926	8.49E-06	0.0162755	0.0005033	8.036549	0.077612	0.702315	0.140995	8.736845	1.742982	116.8175	1.001705	0.0230418	0.0002092	0.0028671	8.89E-06	0.0000467	1.43E-06	0.0013517	0.0004275	0.0000708	1.14E-06	0.0053708	0.0000198	0.0009146	0.0000389
21752-01H	10-LOO-06	Loolmurwak	58a	04/01/2013	WR	14	0.0565085	0.0157448	0.0157453	0.0000612	1.34E-07	1.001209	1.14E-15	7.98E-15	0.0218808	0.0004004	0.601987	0.484595	0.1600367	0.9498062	0.3136719	0.0022208	9.10E-06	0.0170925	0.000505	7.007058	0.0819132	0.5120422	0.1426708	7.305734	2.026152	116.9199	1.001705	0.0187841	0.0002091	0.0026807	8.97E-06	0.0000458	1.34E-06	0.0012991	0.0004285	0.0000587	1.05E-06	0.0043684	0.0000198	0.0007375	0.0000354
21752-01I	10-LOO-06	Loolmurwak	58a	04/01/2013	WR	17	0.1291383	0.0251482	0.0251498	0.0000612	1.34E-07	1.001183	7.23E-16	7.59E-15	0.0315705	0.0006478	1.097108	1.273724	0.2585002	2.4965	0.5066604	0.0035529	0.0000147	0.019356	0.0007427	10.49367	0.1320616	1.170188	0.2278891	11.14202	2.163598	117.0223	1.001706	0.0178629	0.0002091	0.0017023	7.53E-06	0.0000329	1.25E-06	0.0021682	0.0004394	0.0000537	1.08E-06	0.0041696	0.0000192	0.0003991	0.0000341
21752-01J	10-LOO-06	Loolmurwak	58a	04/01/2013	WR	25	-0.043646	0.0205146	0.0205149	0.0000612	1.34E-07	1.001129	1.10E-15	1.64E-14	0.0526187	0.0006453	2.902717	5.615669	0.1972159	11.00671	0.3865432	0.005691	0.0000112	0.0239056	0.0005819	14.86318	0.1509418	-0.3954798	0.1858825	-2.650303	1.225645	117.2259	1.001706	0.0385749	0.0002579	0.0025953	0.0000197	0.000062	1.43E-06	0.0145746	0.0004991	0.0001366	1.31E-06	0.0094636	0.0000197	0.0007484	0.0000332
21752-01K	10-LOO-06	Loolmurwak	58a	04/01/2013	WR	35	0.0256998	0.027166	0.0271661	0.0000612	1.34E-07	1.000991	7.15E-16	9.17E-15	0.0441009	0.0007658	4.37077	7.086913	0.2904178	13.89035	0.5692189	0.0041455	0.0000165	0.0216988	0.0007606	12.82579	0.1541981	0.2328722	0.2461598	1.806606	1.8984	117.7606	1.001708	0.0215989	0.0002071	0.001684	0.0000121	0.0000365	1.25E-06	0.0119345	0.000481	0.0000743	1.17E-06	0.0050311	0.0000186	0.0003206	0.0000348
